# Supplementary material for: Process for the synthesis of symmetric and unsymmetric oxygen bridged dimers of boron subphthalocyanines (μ-oxo-(BsubPc)2s)
Source: Royal Society of Chemistry journal article supplement (doi:10.1039/c4dt02624a), 2015-01-01
Supplement: c4dt02624a1.pdf [file c4dt02624a1.pdf]

## Electronic Supplementary Information.

# Process for the synthesis of symmetric and unsymmetric oxygen bridged dimers of boron subphthalocyanines ( $\mu$ -oxo-(BsubPc)<sub>2</sub>S).

*Jeremy D. Dang<sup>a,†</sup>, Mabel V. Fulford<sup>a,†</sup>, Brett A. Kamino<sup>a</sup>, Andrew S. Paton<sup>a</sup>,*

*and Timothy P. Bender<sup>a,b,c \*</sup>.*

<sup>a</sup> Department of Chemical Engineering and Applied Chemistry, University of Toronto, 200 College St., Toronto, Ontario, Canada M5S 3E5

<sup>b</sup> Department of Chemistry, University of Toronto, 80 St. George St., Toronto, Ontario, Canada, M5S 3H6

<sup>c</sup> Department of Materials Science and Engineering, University of Toronto, 184 College St., Toronto, Ontario, Canada M5S 3E4

\* to whom correspondences should be addressed. Email: [tim.bender@utoronto.ca](mailto:tim.bender@utoronto.ca)

† these two authors contributed equally to the execution of the work described herein and to the preparation of the manuscript.

## Table of Contents

|                                                              |        |
|--------------------------------------------------------------|--------|
| General experimental methods                                 | p. S3  |
| Synthetic procedures                                         | p. S4  |
| NMR spectra                                                  | p. S10 |
| Wavelength of maximum absorption for some monomeric BsubPcs  | p. S20 |
| UV-vis absorption and photoluminescence plots                | p. S21 |
| Determination of fluorescence quantum yields                 | p. S23 |
| Crystal structure details of F <sub>12</sub> BsubPc-O-BsubPc | p. S24 |
| Crystal structure details of Cl <sub>6</sub> BsubPc-O-BsubPc | p. S51 |
| References                                                   | p. S76 |

## General Experimental Methods

**Materials.** All ACS grade solvents, basic alumina, potassium carbonate, and sodium hydroxide were purchased from Caledon Labs (Caledon, Ontario, Canada) and used without further purification unless otherwise stated. Phthalonitrile, 4,5-dichlorophthalonitrile, and tetrafluorophthalonitrile were purchased from TCI America (Portland, Oregon, USA) and used as received. Boron tribromide, boron trichloride (1.0 M solution in heptane), dicyclohexano-18-crown-6, aluminum chloride, aluminum chloride hexahydrate, iron(III) chloride hexahydrate, tin(IV) chloride, tin(IV) chloride pentahydrate, tripotassium phosphate, decamethylferrocene, and tetrabutylammonium perchlorate were purchased from Sigma-Aldrich Chemical Company (Mississauga, Ontario, Canada) and used as received. Tetrachlorophthalonitrile was purchased from Hangzhou Dayangchem Company Limited (Hangzhou, China) and used as received. Extraction thimbles (cellulose, single thickness) and aluminum plates coated with silica (pore size of 60Å) and fluorescent indicator were purchased from Whatman International Ltd. (Kent, England). Silica Gel P60 (mesh size 40-63 µm) was purchased from SiliCycle Inc. (Quebec City, Quebec, Canada).

**Methods.** All reactions were performed under an atmosphere of argon gas using oven-dried glasswares. Thin layer chromatography (TLC) was performed on aluminum plates coated with silica (pore size of 60Å) and fluorescent indicator and visualized under UV (254 nm) light. Column chromatography was performed using Silica Gel P60 (mesh size 40-63 µm) or alumina (basic, mesh size 70-290 µm). Nuclear magnetic resonance (NMR) spectra were recorded on a Bruker Avance III spectrometer at 23 °C in CDCl<sub>3</sub>, operating at 400 MHz for <sup>1</sup>H NMR and 100 MHz for <sup>13</sup>C NMR. Chemical shifts (δ) are reported in parts per million (ppm) referenced to tetramethylsilane (0 ppm) for <sup>1</sup>H NMR and CDCl<sub>3</sub> (77.16 ppm) for <sup>13</sup>C NMR. Coupling constants (*J*) are reported in hertz (Hz). Spin multiplicities are designated by the following abbreviations: s (singlet), d (doublet), t (triplet), q (quartet), m (multiplet) and br (broad). Accurate mass determinations (HRMS) were carried out on an Agilent 6538 Q-TOF mass spectrometer equipped with an Agilent 1200 HPLC and an ESI ion source. Single crystal X-ray diffraction data were collected on a Bruker Kappa APEX-DUO diffractometer using a Copper ImuS (microsource) tube with multi-layer optics and were measured using a combination of φ scans and ω scans. The data were processed using APEX2 and SAINT (Bruker, 2007). Absorption corrections were carried out using SADABS (Bruker, 2007). The structures were solved and refined using SHELXTL and SHELXL-2103 (Sheldrick, 2008) for full-matrix least-squares refinement that was based on *F*<sup>2</sup>. Ultraviolet-visible (UV-vis) absorption spectra were acquired on a PerkinElmer Lambda 1050 UV/VIS/NIR spectrometer using a PerkinElmer quartz cuvette with a 10 mm path length. Photoluminescence (PL) spectra were recorded on a PerkinElmer LS55 fluorescence spectrometer using a PerkinElmer quartz cuvette with a 10mm path length. High pressure liquid chromatography (HPLC) analysis was carried out on a Waters 2695 separation module with a Waters 2998 photodiode array and a Waters Styragel® HR 2 THF 4.6 x 300 mm column. The mobile phase used was HPLC grade acetonitrile (80 % by volume) and *N,N*-dimethylformamide (20 % by volume). Cyclic voltammetry was carried out using a Bioanalytical Systems C3 electrochemical workstation. The working electrode was a 1 mm platinum disk, the counter electrode was a platinum wire, and the reference electrode was Ag/AgCl<sub>2</sub> saturated salt solution. Spec-grade solvents were purged with nitrogen gas at room temperature prior to their use. Four cycles at a scan rate of 100 mV/s were measured for each

sample. Tetrabutylammonium perchlorate (0.1 M) was used as the supporting electrolyte. Decamethylferrocene was used as an internal reference. All half-wave potentials were corrected to the half-wave reduction potential ( $E_{1/2,red}$ ) of decamethylferrocene, which was previously reported to be -0.012 V vs. Ag/AgCl.<sup>1</sup> Soxhlet extractions were performed using single thickness cellulose extraction thimbles (33 × 118 mm, 25 × 80mm).

## Synthetic Procedures

### Synthetic Procedures for Starting BsubPc Materials:

**Br-BsubPc.** Br-BsubPc was prepared according to literature procedure.<sup>2</sup>

**HO-BsubPc.** HO-BsubPc was prepared according to literature procedure.<sup>3</sup>

**Br-F<sub>12</sub>BsubPc.** Br-F<sub>12</sub>BsubPc was prepared according to literature procedure.<sup>4</sup>

**Cl-Cl<sub>6</sub>BsubPc.** Cl-Cl<sub>6</sub>BsubPc was prepared according to literature procedure.<sup>5</sup>

**Cl-Cl<sub>12</sub>BsubPc.** Cl-Cl<sub>12</sub>BsubPc was prepared according to literature procedure.<sup>6</sup>

### Attempted Synthetic Procedures for $\mu$ -Oxo-(BsubPc)<sub>2</sub>:

**Methods 1.1 to 1.4 (Table S1):** For **1.1**, conditions were maintained as reported by Geyer *et al.*<sup>7</sup> For **1.2-1.4**: Br-BsubPc was used in the place of Cl-BsubPc. In **1.3**, the volume of solvent was reduced by a factor of four. In **1.4**, the amount of NaOH was reduced to a molar amount equivalent to the moles of Br-BsubPc while keeping its molar equivalence relative to dicyclohexano-18-crown-6 the same.

**Table S1.**  $\mu$ -Oxo-(BsubPc)<sub>2</sub> syntheses adapted from Geyer *et al.*<sup>7</sup>

| Method                  | Halo-BsubPc |          |              | <i>p</i> -Xylene | NaOH     |              | Dicyclohexano-18-Crown-6 |              |
|-------------------------|-------------|----------|--------------|------------------|----------|--------------|--------------------------|--------------|
|                         | Halo        | Mass (g) | Moles (mmol) | Volume (mL)      | Mass (g) | Moles (mmol) | Mass (g)                 | Moles (mmol) |
| <b>1.1</b> <sup>7</sup> | Cl          | 0.14     | 0.325        | 200              | 0.08     | 2            | 0.28                     | 0.75         |
| <b>1.2</b>              | Br          | 0.154    | 0.325        | 200              | 0.08     | 2            | 0.28                     | 0.75         |
| <b>1.3</b>              | Br          | 0.154    | 0.325        | 50               | 0.08     | 2            | 0.28                     | 0.75         |
| <b>1.4</b>              | Br          | 0.154    | 0.325        | 50               | 0.013    | 0.325        | 0.045                    | 0.122        |

**Method 2.1 - Self-Condensation of HO-BsubPc Method (Table S2):**  $\mu$ -Oxo-(BsubPc)<sub>2</sub> was synthesized by the self-condensation of HO-BsubPc as adapted from the method of Yamasaki & Mori.<sup>8</sup> 1,2-Dichlorobenzene (1.4 mL) was added to make up a 10 wt% solution of HO-BsubPc (0.200 g, 0.485 mmol) in a 4 Dram (15 mL) vial fitted with a condenser. The reaction mixture was heated to a reflux (180 °C) under an atmosphere of argon and the reaction progress was monitored by HPLC. After 120 h (5 days), full conversion was not achieved and the reaction was cooled to room temperature. The solvent was removed by rotary evaporation and the solid was

dried in a vacuum oven overnight at 40°C. The crude product was purified by Kauffman column chromatography (alumina, DCM). The first band was collected and it contained  $\mu$ -oxo-(BsubPc)<sub>2</sub> and two unknown impurities (HPLC R<sub>T</sub>: 2.0 min and 3.7 min) and the second band was a mixture of the same in addition to traces of other BsubPc impurities. The collected fractions were concentrated via rotary evaporation and dried in a vacuum oven overnight at 40°C to afford  $\mu$ -oxo-(BsubPc)<sub>2</sub> (45 mg, 23 %).

**Method 2.2 - '1 Pot' Reaction Method (Table S2):**  $\mu$ -Oxo-(BsubPc)<sub>2</sub> was synthesized as reported in (9) by the *in situ* hydrolysis of Br-BsubPc (0.200 g, 0.421 mmol) in the presence of water.

**Table S2.**  $\mu$ -Oxo-(BsubPc)<sub>2</sub> syntheses via the self-condensation of HO-BsubPc method.

| Method                  | BsubPc Starting Material | Mass (g) | Moles (mmol) | Volume of 1,2-Dichlorobenzene (mL) | Weight Percent (%) | Temperature (°C) | Reaction Time (h) |
|-------------------------|--------------------------|----------|--------------|------------------------------------|--------------------|------------------|-------------------|
| <b>2.1</b> <sup>8</sup> | HO-BsubPc                | 0.20     | 0.485        | 1.4                                | 10                 | 180              | 120               |
| <b>2.2</b> <sup>9</sup> | Br-BsubPc                | 0.20     | 0.421        | 1.4                                | 10                 | 180              | 24                |

**Methods 3.1 to 3.6 - Equimolar Method (Table S3):**  $\mu$ -Oxo-(BsubPc)<sub>2</sub> was synthesized by reacting equimolar quantities of HO-BsubPc and Br-BsubPc, a reaction pathway which is included in the patent application of Mori *et al.*<sup>10</sup> For **3.1** to **3.5**, solvent was added to HO-BsubPc (0.100 g, 0.243 mmol) and Br-BsubPc (0.115 g, 0.243 mmol) in a scintillation (20 mL) or 4 Dram (15 mL) vial fitted with a condenser, to make up a ~2 wt% or ~10 wt% solution, respectively. Each reaction was heated to a temperature (as indicated in Table S3) under an atmosphere of argon and the reaction progress was monitored by HPLC. After a certain reaction time (as indicated in Table S3), the concentration of  $\mu$ -oxo-(BsubPc)<sub>2</sub> had reach steady state as determined by HPLC. The reaction was cooled to room temperature. For **3.1** to **3.3**, no further workup was done. The subsequent steps for **3.5** and **3.6** (5x scale of **3.5**) are described in (3). For **3.4**, solvent was added to the reaction mixture in an attempt to precipitate out  $\mu$ -oxo-(BsubPc)<sub>2</sub>. A significant quantity of cyclohexane (200 mL) was added, however no precipitate was observed until after the solution was left covered in an ice bath overnight. The recovered solids were dried in a vacuum oven overnight at 40°C (123 mg; HPLC (545nm channel): 82 %  $\mu$ -oxo-(BsubPc)<sub>2</sub> by area). In a replicate of **3.4**, methanol was added to the reaction mixture and no precipitate was observed.

**Table S3.**  $\mu$ -Oxo-(BsubPc)<sub>2</sub> syntheses via the equimolar method.

| Method     | Solvent             | Volume (mL) | Weight Percent (wt %) | Temperature (°C) | Reaction Time (h) |
|------------|---------------------|-------------|-----------------------|------------------|-------------------|
| <b>3.1</b> | <i>p</i> -xylene    | 10          | 2.4                   | 105              | 139.5             |
| <b>3.2</b> | nitrobenzene        | 10          | 1.8                   | 200              | 31                |
| <b>3.3</b> | diphenyl ether      | 10          | 2.0                   | 200              | 31                |
| <b>3.4</b> | diphenyl ether      | 1.8         | 10                    | 200              | 15.5              |
| <b>3.5</b> | 1,2-dichlorobenzene | 1.5         | 10                    | 181              | 20                |
| <b>3.6</b> | 1,2-dichlorobenzene | 7.5         | 10                    | 181              | 20                |

**Methods 4.1 - 4.3, 4.5 - Equimolar Tripotassium Phosphate Method (Table S4):**  $\mu$ -Oxo-(BsubPc)<sub>2</sub> was synthesized based on 3.5/3.6, but with the addition of tripotassium phosphate (K<sub>3</sub>PO<sub>4</sub>). 1,2-Dichlorobenzene was added to make up a 10 wt% solution of equimolar HO-BsubPc and Br-BsubPc in a 4 Dram (15 mL) vial fitted with a condenser. In 4.3, glassware were dried in an oven at 100 °C overnight and the solvent was filtered through alumina before use. A mass of K<sub>3</sub>PO<sub>4</sub> equivalent to 20 % or 80 % of the solvent's mass, ground in a mortar and pestle and activated in an oven at 200 °C was added. The reaction mixture was heated to a reflux under an atmosphere of argon and the reaction progress was monitored by HPLC. Samples were filtered through glass wool prior to analysis via HPLC to remove suspended solids. After a certain reaction time (as indicated in Table S4), the reaction was cooled to room temperature. Various workup steps followed.

For 4.1, the solvent was removed by rotary evaporation and the solid was dried in a vacuum oven overnight at 40 °C. The solids were transferred to a Soxhlet thimble and a Soxhlet extraction using toluene was carried out. The solids remaining in the thimble had a deep turquoise colour and were insoluble in a range of organic solvents. The solvent was removed from the filtrate by rotary evaporation and the solid was then dried in a vacuum oven overnight at 40 °C (60 mg, 31 %). Pure  $\mu$ -oxo-(BsubPc)<sub>2</sub> was not isolated.

For 4.2, the same sequence was followed as 4.1 with a Soxhlet extraction using toluene (130 mg, 66 %). The solids were train sublimed at 220 °C to remove small molecule impurities (70 mg, 36 %). The solids remaining in the crucible were subsequently train sublimed at 450 °C following the same procedure as 3.5, and  $\mu$ -oxo-(BsubPc)<sub>2</sub> was collected as a loosely, partially crystalline solid (16 mg, 8 %).

For 4.3, the reaction products were not isolated.

For 4.5, the reaction mixture was transferred directly into a Soxhlet thimble and a Soxhlet extraction using toluene was carried out. Alumina (40 g) was added to the toluene retentate (~100 mL) and stirred. The liquid was decanted into a filter, and more toluene was added to the flask containing alumina and stirred. This was repeated several times and the remaining alumina and liquid was poured into the filter and rinsed with toluene. The toluene rinse runoff remained deeply magenta coloured. The solvent was removed from the filtrate by rotary evaporation and the solid was dried in a vacuum oven overnight at 40 °C (42 mg, 21 %). HPLC R<sub>T</sub>: 2.8 min (>99.9%, 545 nm channel). A Kauffman column was run on the retained and dried alumina using DCM as the eluent. The solvent was removed from the filtrate by rotary evaporation and the solid was dried in a vacuum oven overnight at 40 °C (14 mg, 7%). HPLC R<sub>T</sub>: 2.8 min (>99.9%, 545 nm channel). (Total Yield: 56 mg, 29 %).  $\mu$ -Oxo-(BsubPc)<sub>2</sub> could not separated from the non-BsubPc impurities.

**Methods 4.4, 4.6 - 4.8 – '1 pot' Tripotassium Phosphate Method (Table S4):**  $\mu$ -Oxo-(BsubPc)<sub>2</sub> was synthesized based on 2.2, but with the addition of K<sub>3</sub>PO<sub>4</sub>. For 4.4 and 4.6, K<sub>3</sub>PO<sub>4</sub> was grinded in a mortar and pestle and activated in an oven at 200 °C. It was then left exposed to the atmosphere to absorb water overnight or until its mass had increased by approximately 15%, at which point the dry mass equivalent of wet K<sub>3</sub>PO<sub>4</sub> corresponding to 20 % of the solvent's mass was added to the reaction vial (wet mass calculated using the measured wt% of water). For 4.7 and 4.8, a mass of dry K<sub>3</sub>PO<sub>4</sub> equivalent to 20 % of the solvent's mass, ground in a mortar and pestle and activated in an oven at 200 °C, was added to the reaction vial. This was then left open to absorb water until its mass had increased by approximately 15 %. 1,2-Dichlorobenzene

was added to make up a 10 wt% solution of Br-BsubPc in the 4 Dram (15 mL) (4.4, 4.6) or scintillation (20 mL) (4.7 - 4.8) vial fitted with a condenser. The reaction was heated to a reflux under an atmosphere of argon and the reaction progress was monitored by HPLC. Samples were filtered through glass wool prior to analysis via HPLC to remove suspended solids. After a certain reaction time (as indicated in Table S4), the reaction was cooled to room temperature. Various workup steps followed.

For 4.4, 4.6-4.8 the reaction products were not isolated.

**Method 4.9 – Final Method (Table S4):**  $\mu$ -Oxo-(BsubPc)<sub>2</sub> was synthesized based on an adaptation of 4.5. 1,2-Dichlorobenzene (6.9 mL) was added to make up a 10 wt% solution of HO-BsubPc (0.464 g, 1.13 mmol) and Br-BsubPc (0.535 g, 1.13 mmol) in a scintillation (20 mL) vial fitted with a condenser. A mass of K<sub>3</sub>PO<sub>4</sub> equivalent to 20 % of the solvent's mass (1.801 g, 8.49 mmol), ground in a mortar and pestle and activated in an oven at 200 °C was added. The reaction was heated to a reflux under an atmosphere of argon and the reaction progress was monitored by HPLC. After 1 hour, the reaction was cooled and immediately transferred to a Soxhlet thimble. A Soxhlet extraction using toluene was carried out for 2 days. The solvents were removed by rotary evaporation and the solids were fully redissolved in DCM. A Kauffman column chromatography (alumina, DCM) was carried out. The column was left to dry overnight, after which a fresh flask of DCM was placed under the column and reflux was established. The Kauffman column was ran for another day. The solvent was removed by rotary evaporation and the solids were dried in a vacuum oven overnight at 40 °C (537 mg, 59 % overall mass yield, HPLC R<sub>T</sub>: 2.8 min (>99.9%, at 545 nm)). The solids were train sublimed at a temperature of 450 °C (held for 5hrs 45min, total heating time 10hrs 15min), and single crystals as well as a band of  $\mu$ -oxo-(BsubPc)<sub>2</sub> were collected (357 mg, overall 39 % mass yield; sublimation step yield 70%). Removed white crystals were found to be phthalimide (~10 mg) and bands containing small quantities of HO-BsubPc were also discarded (mass below collection limit). The  $\mu$ -oxo-(BsubPc)<sub>2</sub> was train sublimed a second time under the same conditions. Single crystals and  $\mu$ -oxo-(BsubPc)<sub>2</sub> band were collected (sublimation step yield 58 %). Overall yield: 0.204 g, 22.5 %. HPLC R<sub>T</sub>: 2.8 min (>99.9%, MAXPlot).

**Table S4.**  $\mu$ -Oxo-(BsubPc)<sub>2</sub> syntheses via the tripotassium phosphate method.

| Method | Volume of 1,2-Dichlorobenzene (mL) | HO-BsubPc |              | Br-BsubPc |              | Mass of K <sub>3</sub> PO <sub>4</sub> |              |              | Reaction Time (h) |
|--------|------------------------------------|-----------|--------------|-----------|--------------|----------------------------------------|--------------|--------------|-------------------|
|        |                                    | Mass (g)  | Moles (mmol) | Mass (g)  | Moles (mmol) | % of Solvent Mass                      | Dry Mass (g) | Wet Mass (g) |                   |
| 4.1    | 1.5                                | 0.100     | 0.243        | 0.115     | 0.243        | 80                                     | 1.553        | -            | 24                |
| 4.2    | 1.5                                | 0.100     | 0.243        | 0.115     | 0.243        | 20                                     | 0.388        | -            | 24                |
| 4.3    | 1.5                                | 0.100     | 0.243        | 0.115     | 0.243        | 20                                     | 0.388        | -            | 24                |
| 4.4    | 1.6                                | 0         | 0            | 0.231     | 0.485        | 20                                     | 0.388        | 0.437        | 24                |
| 4.5    | 1.5                                | 0.100     | 0.243        | 0.115     | 0.243        | 20                                     | 0.388        | -            | 1                 |
| 4.6    | 1.6                                | 0         | 0            | 0.231     | 0.485        | 20                                     | 0.388        | 0.464        | 1                 |
| 4.7    | 4.0                                | 0         | 0            | 0.576     | 1.213        | 20                                     | 1.039        | 1.193        | 1.25              |
| 4.8    | 4.0                                | 0         | 0            | 0.576     | 1.213        | 20                                     | 1.039        | 1.236        | 1                 |
| 4.9    | 6.9                                | 0.464     | 1.13         | 0.535     | 1.13         | 20                                     | 1.801        | -            | 1                 |

## Synthetic Procedures for Asymmetric $\mu$ -Oxo-(BsubPc)<sub>2</sub> Compounds:

**F<sub>12</sub>BsubPc-O-BsubPc.** To a single neck round bottom flask equipped with a condenser was added 1,2-dichlorobenzene (14 mL, ~10 w/w % relative to HO-BsubPc and Br-F<sub>12</sub>BsubPc), HO-BsubPc (0.75 g, 1.82 mmol, 1 equiv), and Br-F<sub>12</sub>BsubPc (1.26 g, 1.82 mmol, 1 equiv) under an argon atmosphere. To this reaction mixture was added tripotassium phosphate (3.66 g, ~20 % mass equivalent relative to 1,2-DCB), which was pre-ground and activated in an oven at 200 °C for one hour prior to use. The reaction mixture was heated to 180 °C and the reaction progress was monitored by HPLC. Once the reaction was complete (~19 h), the reaction was cooled to room temperature before it was concentrated to dryness via rotary evaporation. The crude product was purified by silica gel column chromatography (100% DCM to 95:5 DCM/ethyl acetate) to afford F<sub>12</sub>BsubPc-O-BsubPc (670 mg, 36 %) as a dark purple-gold solid. The compound was further purified using train sublimation. The apparatus was operated under a vacuum with a controlled flow of carbon dioxide gas generating an internal pressure of 100 mTorr. The temperature was increased from room temperature up to ~440 °C and was held constant at that temperature overnight (~12 h). A metallic gold band was confirmed to be the title compound (71 mg, 41 % yield relative to mass placed in the train sublimation apparatus). Vapour diffusion of heptane into DCM solution produced single crystals suitable for X-ray diffraction analysis. <sup>1</sup>H NMR (400 MHz, CDCl<sub>3</sub>, Me<sub>4</sub>Si)  $\delta$  8.70-8.64 (m, 6H), 7.87-7.81 (m, 6H); <sup>13</sup>C NMR (100 MHz, CDCl<sub>3</sub>)  $\delta$  150.6, 147.4, 130.7, 129.8, 122.0; <sup>11</sup>B NMR (400 MHz, CDCl<sub>3</sub>, BF<sub>3</sub>•OEt<sub>2</sub>)  $\delta$  -18.3 (s); <sup>19</sup>F NMR (400 MHz, CDCl<sub>3</sub>, BF<sub>3</sub>•OEt<sub>2</sub>)  $\delta$  15.67-14.93 (m, 6F), 4.28-3.60 (m, 6F); HRMS (ESI):  $m/z$  [M+H]<sup>+</sup> calcd for 1021.1397, found 1021.1368; UV-vis<sub>toluene</sub>  $\lambda_{\max}$  ( $\epsilon$ ): 547 nm (89800 M<sup>-1</sup>cm<sup>-1</sup>).

**Cl<sub>6</sub>BsubPc-O-BsubPc.** To a single neck round bottom flask equipped with a condenser was added 1,2-dichlorobenzene (13 mL, ~10 w/w % relative to HO-BsubPc and Cl-Cl<sub>6</sub>BsubPc), HO-BsubPc (0.75 g, 1.82 mmol, 1 equiv), and Cl-Cl<sub>6</sub>BsubPc (1.16 g, 1.82 mmol, 1 equiv) under an argon atmosphere. To this reaction mixture was added tripotassium phosphate (3.40 g, ~20 % mass equivalent relative to 1,2-DCB), which was pre-ground and activated in an oven at 200 °C for one hour prior to use. The reaction mixture was heated to 180 °C and the reaction progress was monitored by HPLC. Once the reaction was complete (~17 h), the reaction was cooled to room temperature before it was concentrated to dryness via rotary evaporation. The crude product was purified by silica gel column chromatography (100% DCM to 95:5 DCM/ethyl acetate) to afford Cl<sub>6</sub>BsubPc-O-BsubPc (737 mg, 40 %) as a gold solid. The compound was further purified using train sublimation. The apparatus was operated under a vacuum with a controlled flow of carbon dioxide gas generating an internal pressure of 90 mTorr. The temperature was increased from room temperature up to ~440 °C and was held constant at that temperature overnight (~12 h). A metallic gold band was confirmed to be the title compound (50 mg, 35 % yield relative to mass placed in the train sublimation apparatus). Slow evaporation from DCM solution produced single crystals suitable for X-ray diffraction analysis. <sup>1</sup>H NMR (400 MHz, CDCl<sub>3</sub>, Me<sub>4</sub>Si)  $\delta$  8.63-8.59 (m, 12H), 7.83-7.77 (m, 6H); <sup>13</sup>C NMR (100 MHz, CDCl<sub>3</sub>)  $\delta$  150.5, 149.3, 134.4, 130.6, 129.53, 129.5, 123.5, 121.9; <sup>11</sup>B NMR (400 MHz, CDCl<sub>3</sub>, BF<sub>3</sub>•OEt<sub>2</sub>)  $\delta$  -18.2 (s); HRMS (ESI):  $m/z$  [M+H]<sup>+</sup> calcd for 1009.0189, found 1009.0166; UV-vis<sub>toluene</sub>  $\lambda_{\max}$  ( $\epsilon$ ): 541 nm (89800 M<sup>-1</sup>cm<sup>-1</sup>).



**Cl<sub>12</sub>BsubPc-O-BsubPc.** To a single neck round bottom flask equipped with a condenser was added 1,2-dichlorobenzene (10 mL, ~10 w/w % relative to HO-BsubPc and Cl-Cl<sub>12</sub>BsubPc), HO-BsubPc (0.50 g, 1.21 mmol, 1 equiv), and Cl-Cl<sub>12</sub>BsubPc (1.02 g, 1.21 mmol, 1 equiv) under an argon atmosphere. To this reaction mixture was added tripotassium phosphate (2.60 g, ~20 % mass equivalent relative to 1,2-DCB), which was pre-ground and activated in an oven at 200 °C for one hour prior to use. The reaction mixture was heated to 180 °C and the reaction progress was monitored by HPLC. Once the reaction was complete (~18 h), the reaction was cooled to room temperature before it was concentrated to dryness via rotary evaporation. The crude product was purified by silica gel column chromatography (100% DCM) to afford Cl<sub>12</sub>BsubPc-O-BsubPc (630 mg, 43 %) as a dark purple solid. The compound was further purified using train sublimation. The apparatus was operated under a vacuum with a controlled flow of carbon dioxide gas generating an internal pressure of 90 mTorr. The temperature was increased from room temperature up to ~480 °C and was held constant at that temperature overnight (~12 h). A metallic gold band was confirmed to be the title compound (73 mg, 55 % yield relative to mass placed in the train sublimation apparatus). <sup>1</sup>H NMR (400 MHz, CDCl<sub>3</sub>, Me<sub>4</sub>Si) δ 8.69-8.64 (m, 6H), 7.86-7.80 (m, 6H); <sup>13</sup>C NMR (100 MHz, CDCl<sub>3</sub>) δ 150.7, 148.1, 135.0, 130.7, 129.7, 128.5, 127.3, 122.1; <sup>11</sup>B NMR (400 MHz, CDCl<sub>3</sub>, BF<sub>3</sub>•OEt<sub>2</sub>) δ -18.7 (s); MS (ESI): *m/z* [M+H]<sup>+</sup> calcd for 1219.8, found 1219.8; UV-vis<sub>toluene</sub> λ<sub>max</sub> (ε): 558 nm (89600 M<sup>-1</sup>cm<sup>-1</sup>).

# NMR Spectra

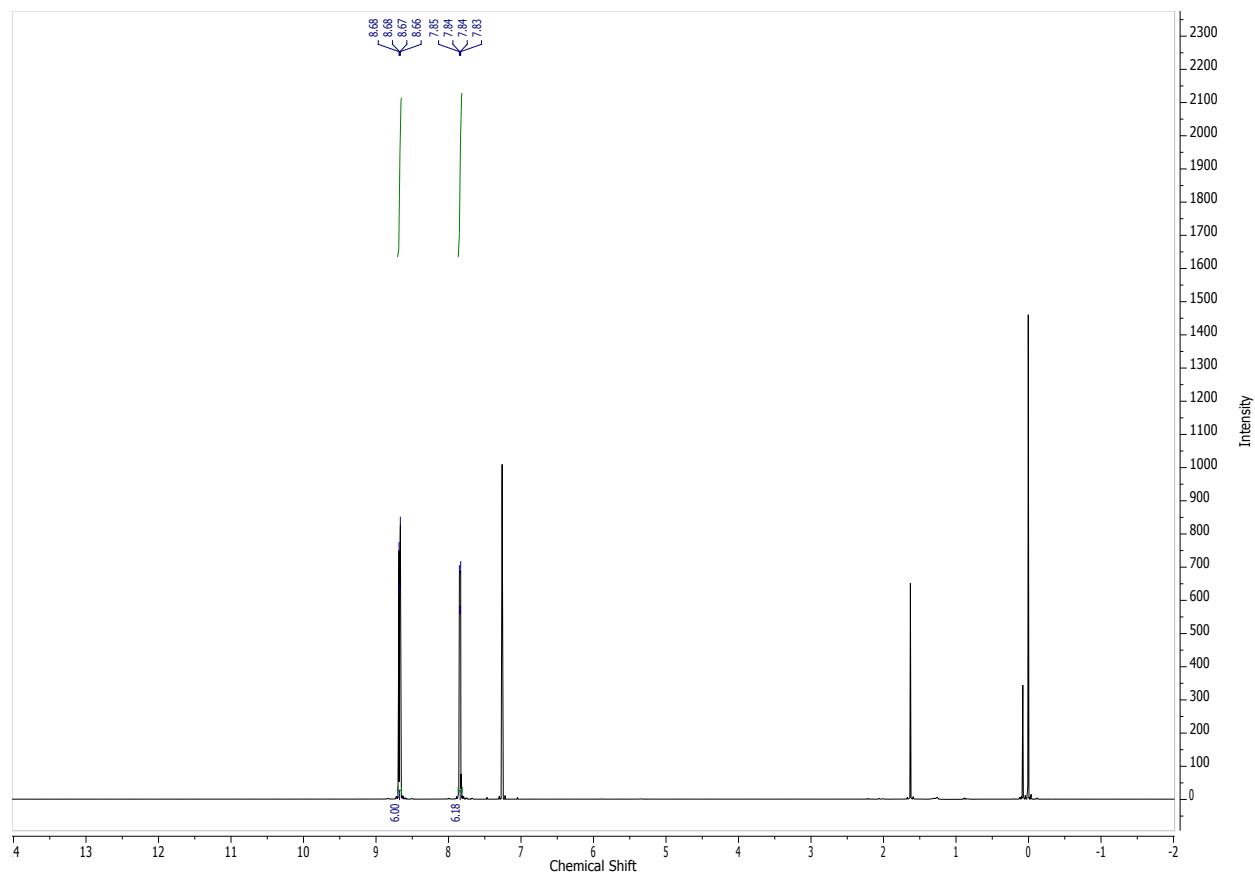

**Figure S1.** <sup>1</sup>H NMR (400 MHz, CDCl<sub>3</sub>) spectrum obtained at 296 K for F<sub>12</sub>BsubPc-O-BsubPc.

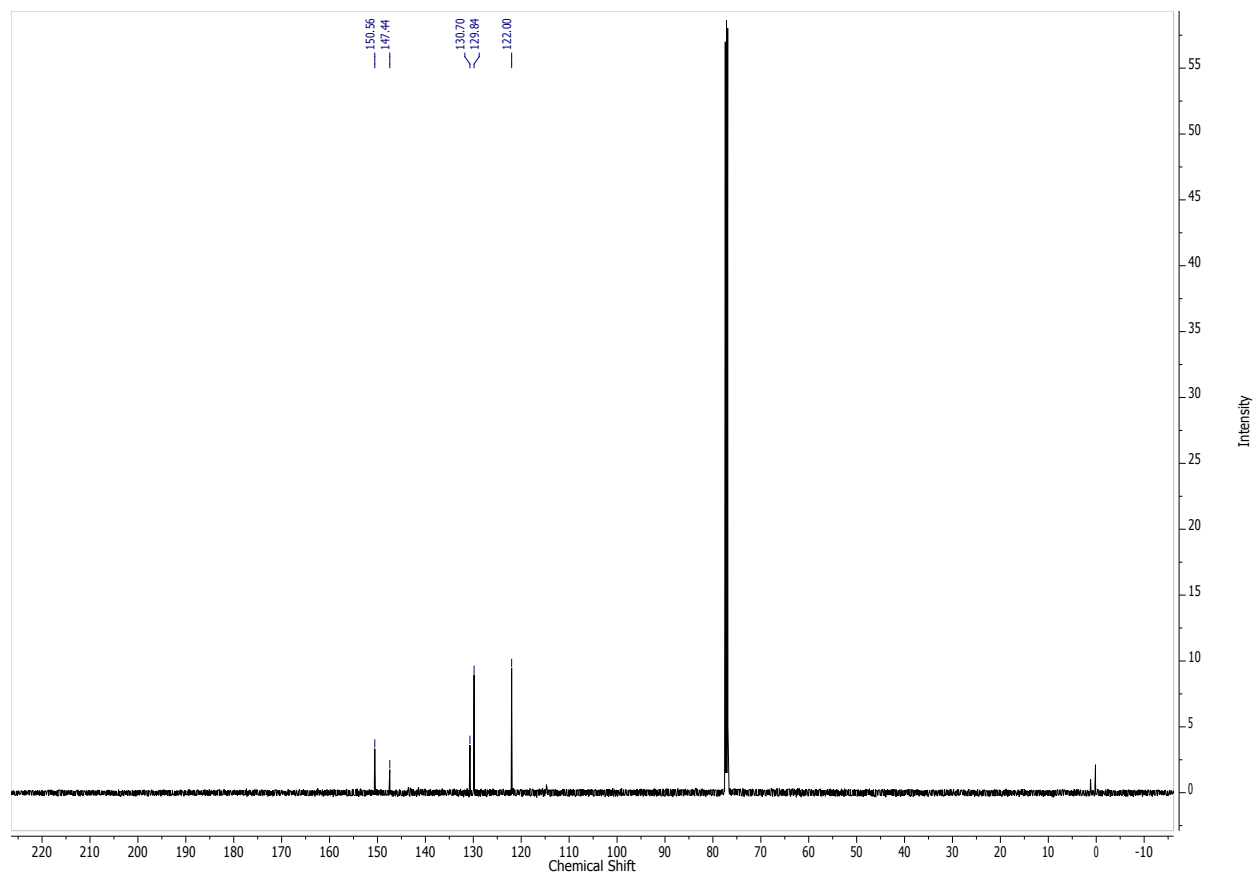

**Figure S2.**  $^{13}\text{C}$  NMR (100 MHz,  $\text{CDCl}_3$ ) spectrum obtained at 296 K for  $\text{F}_{12}\text{BsubPc-O-BsubPc}$ .

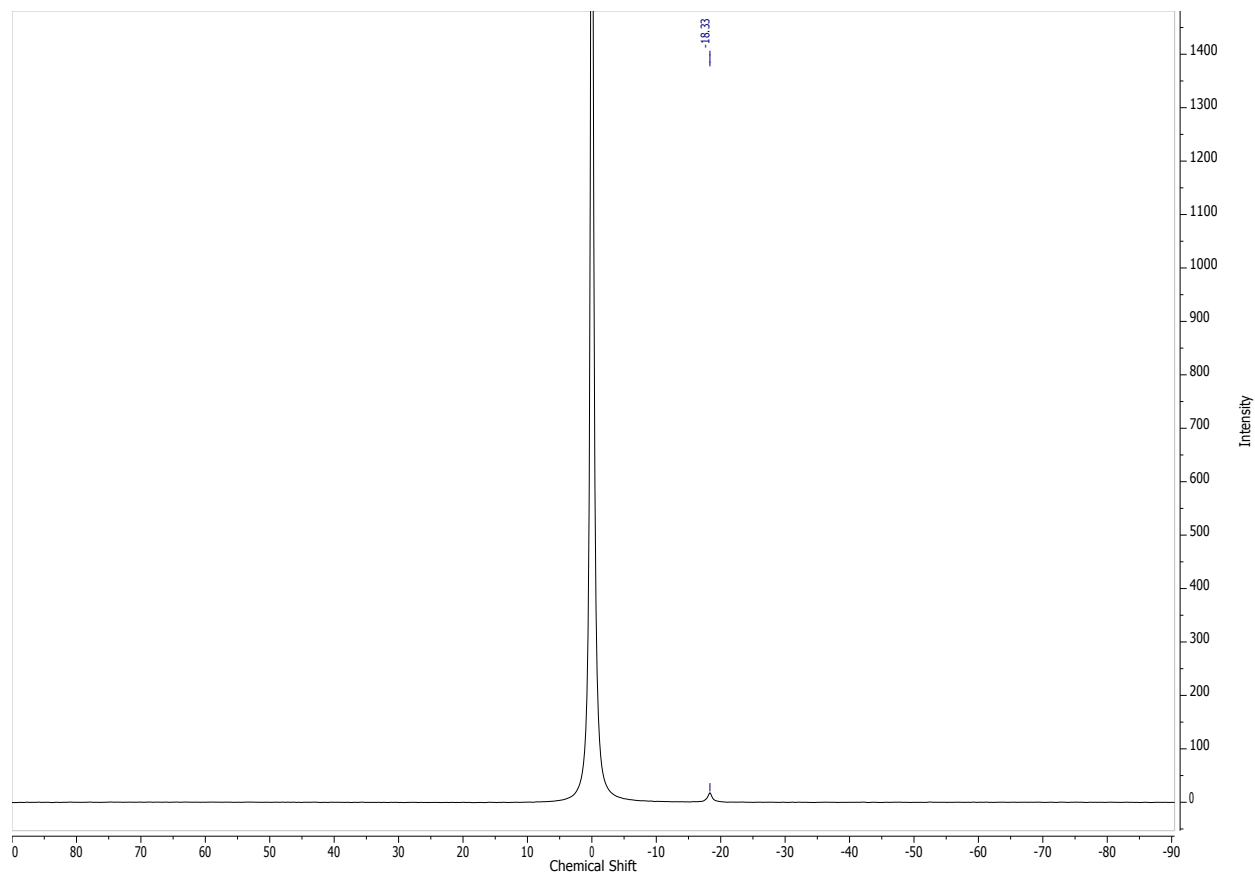

**Figure S3.**  $^{11}\text{B}$  NMR (400 MHz,  $\text{CDCl}_3$ , referenced to  $\text{BF}_3 \cdot \text{OEt}_2$ ) spectrum obtained at 296 K for  $\text{F}_{12}\text{BsubPc-O-BsubPc}$ .

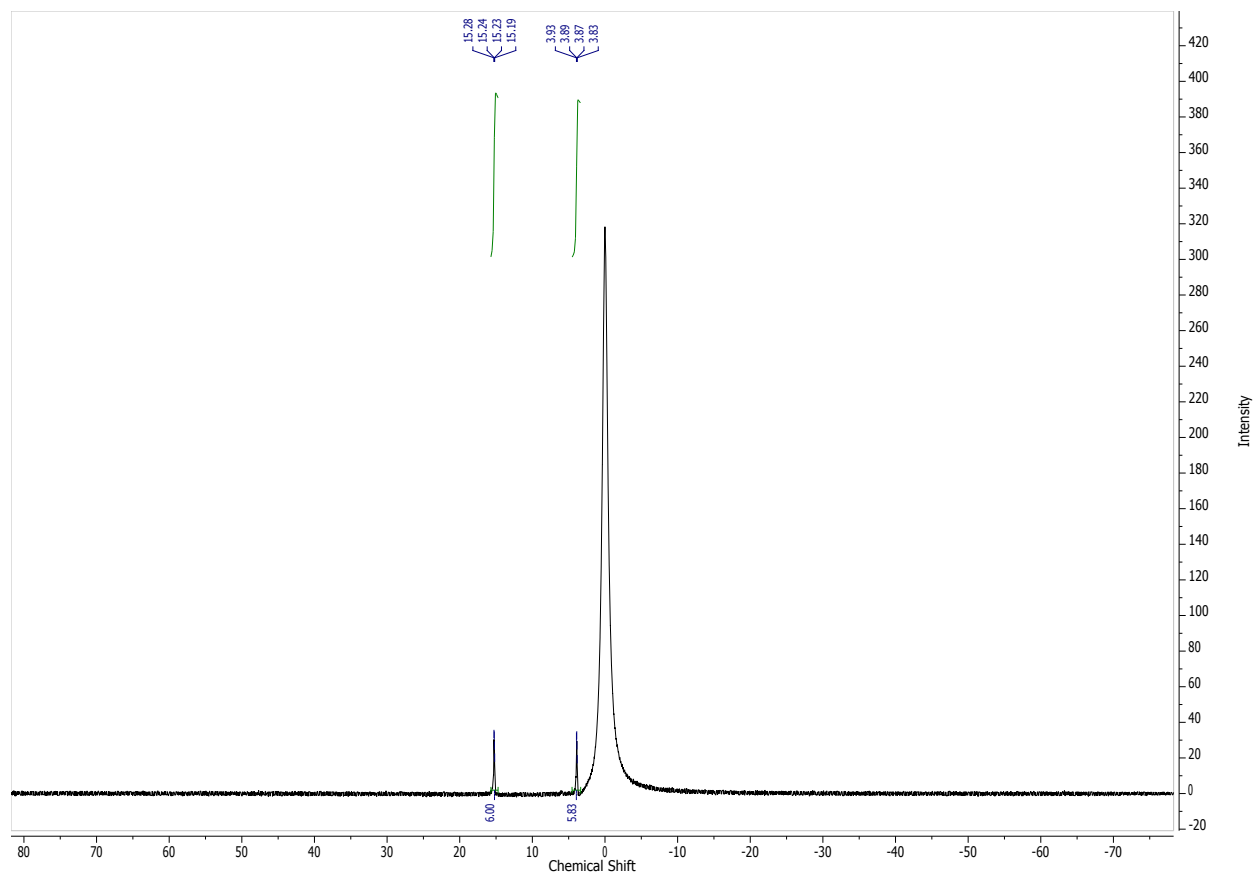

**Figure S4.**  $^{19}\text{F}$  NMR (400 MHz,  $\text{CDCl}_3$ , referenced to  $\text{BF}_3 \cdot \text{OEt}_2$ ) spectrum obtained at 296 K for  $\text{F}_{12}\text{BsubPc-O-BsubPc}$ .

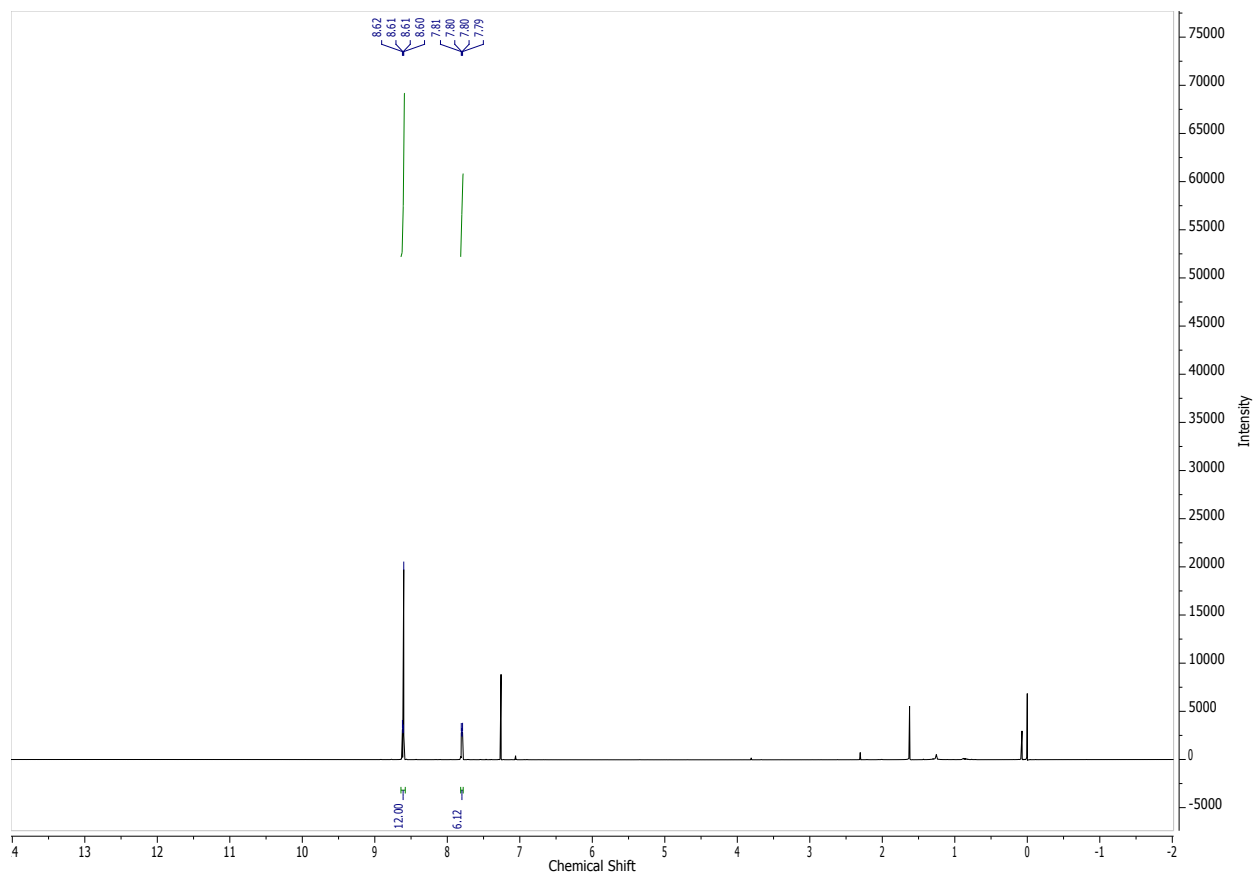

**Figure S5.** <sup>1</sup>H NMR (400 MHz, CDCl<sub>3</sub>) spectrum obtained at 296 K for Cl<sub>6</sub>BsubPc-O-BsubPc.

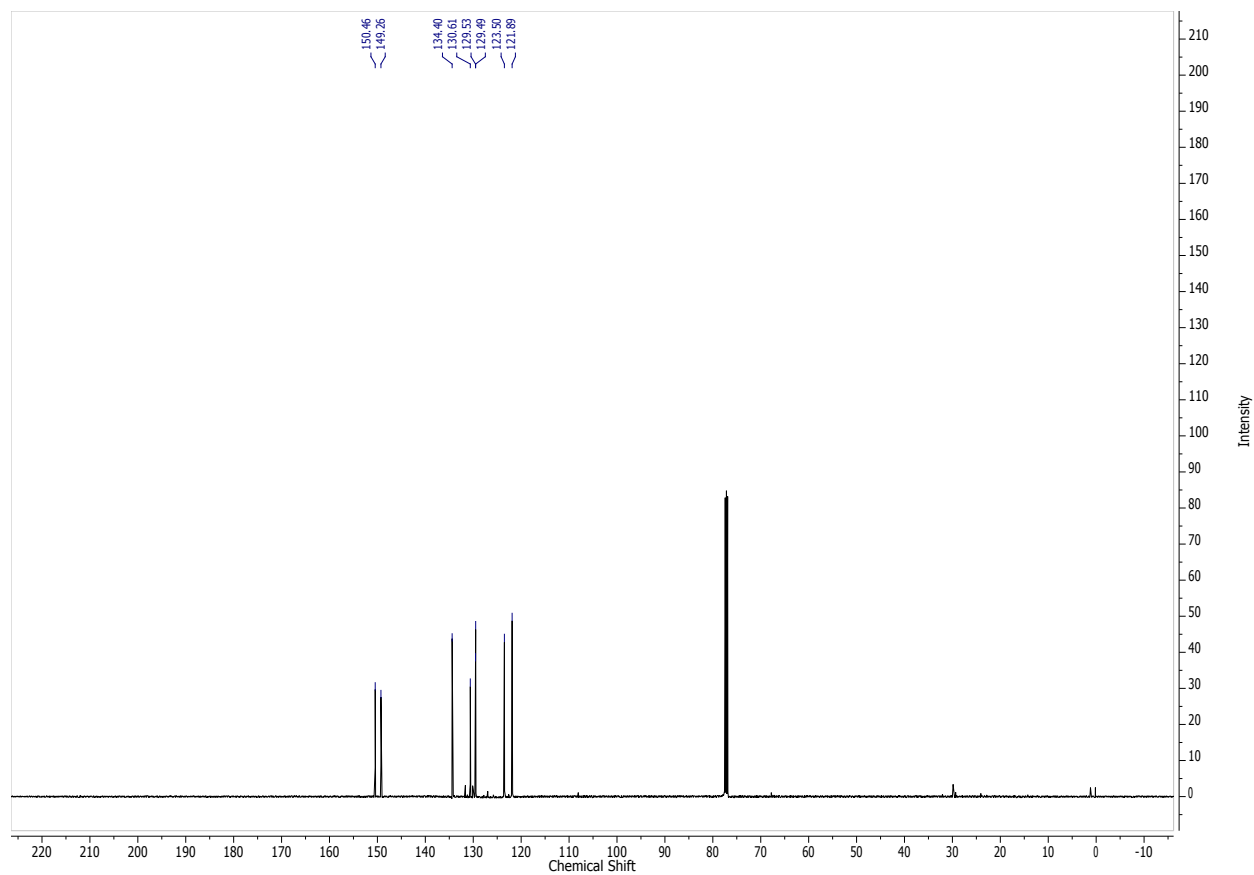

**Figure S6.** <sup>13</sup>C NMR (100 MHz, CDCl<sub>3</sub>) spectrum obtained at 296 K for Cl<sub>6</sub>BsubPc-O-BsubPc.

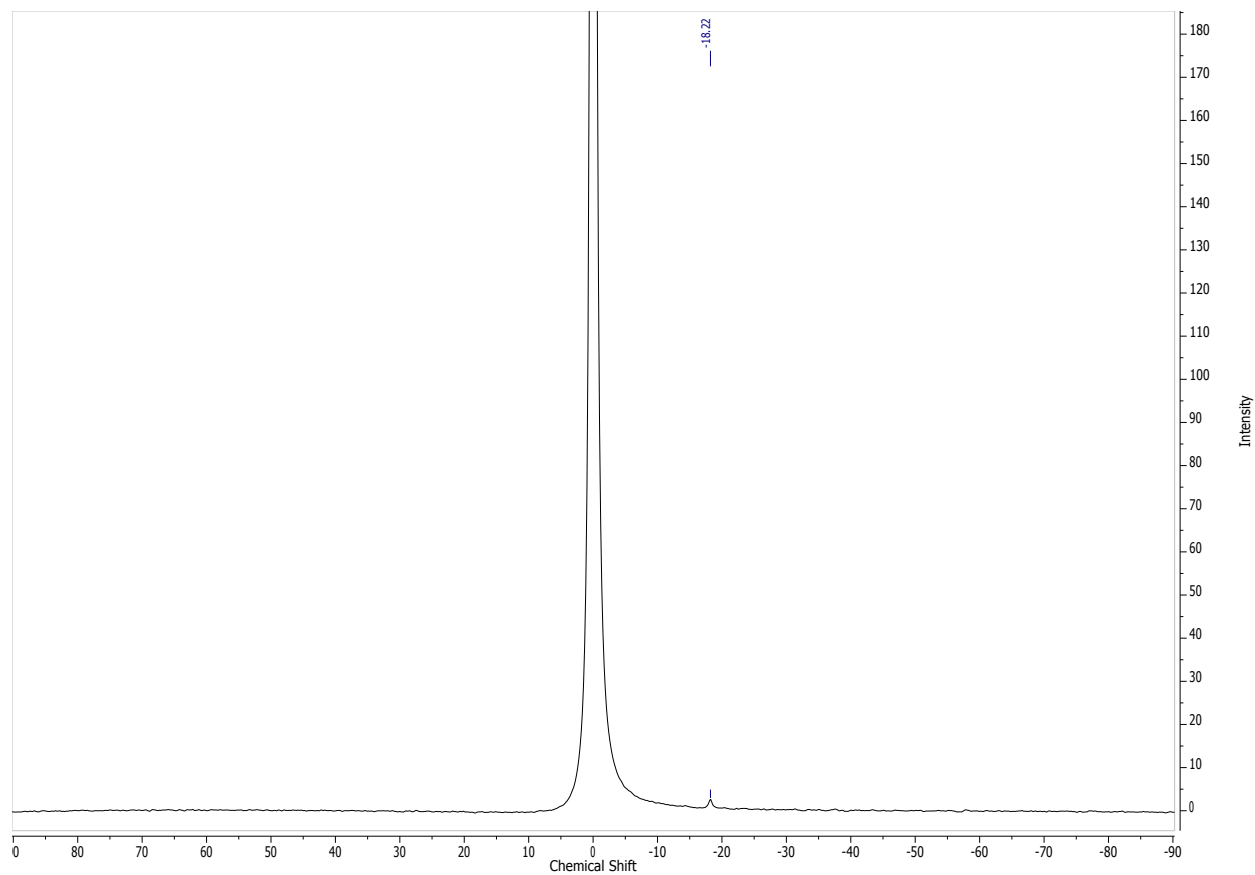

**Figure S7.**  $^{11}\text{B}$  NMR (400 MHz,  $\text{CDCl}_3$ , referenced to  $\text{BF}_3 \cdot \text{OEt}_2$ ) spectrum obtained at 296 K for  $\text{Cl}_6\text{BsubPc-O-BsubPc}$ .



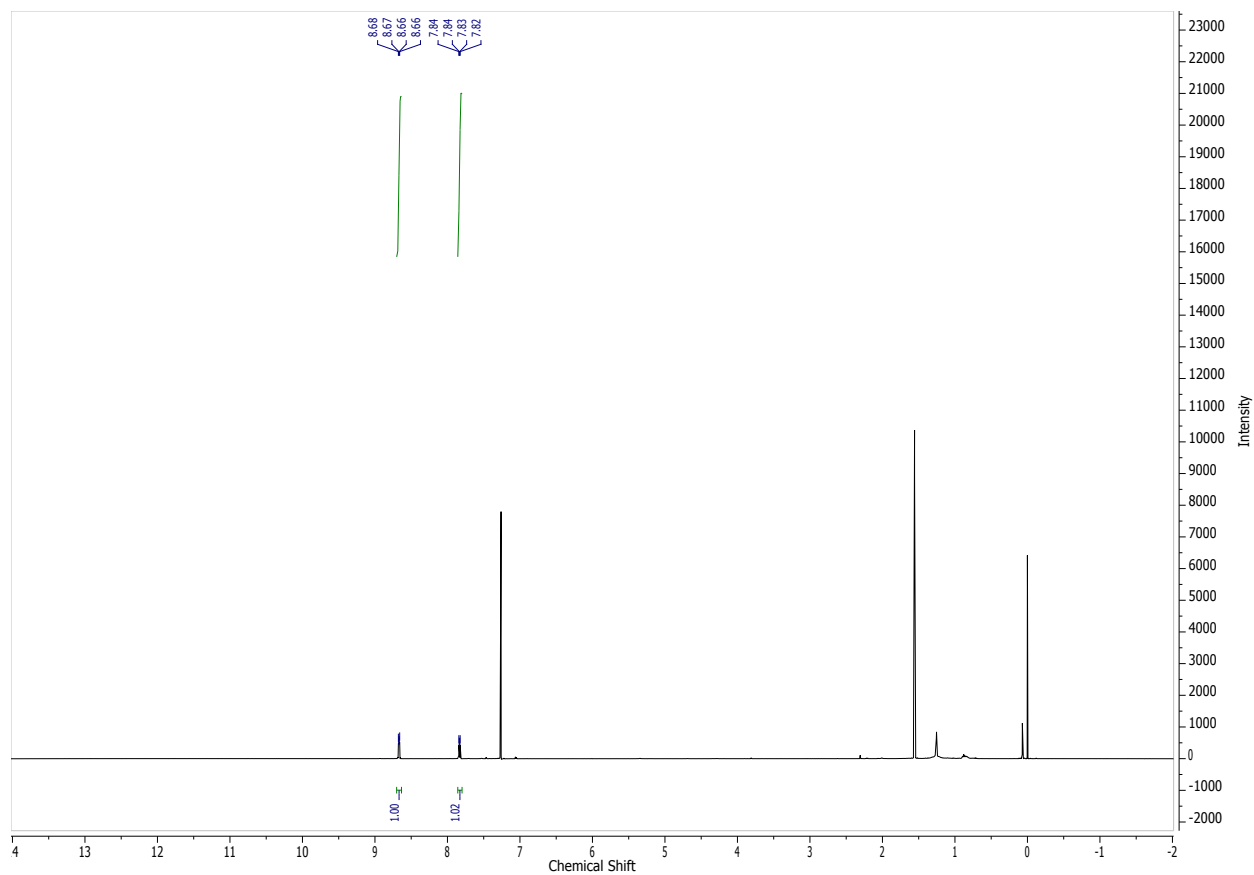

**Figure S8.** <sup>1</sup>H NMR (400 MHz, CDCl<sub>3</sub>) spectrum obtained at 296 K for Cl<sub>12</sub>BsubPc-O-BsubPc.

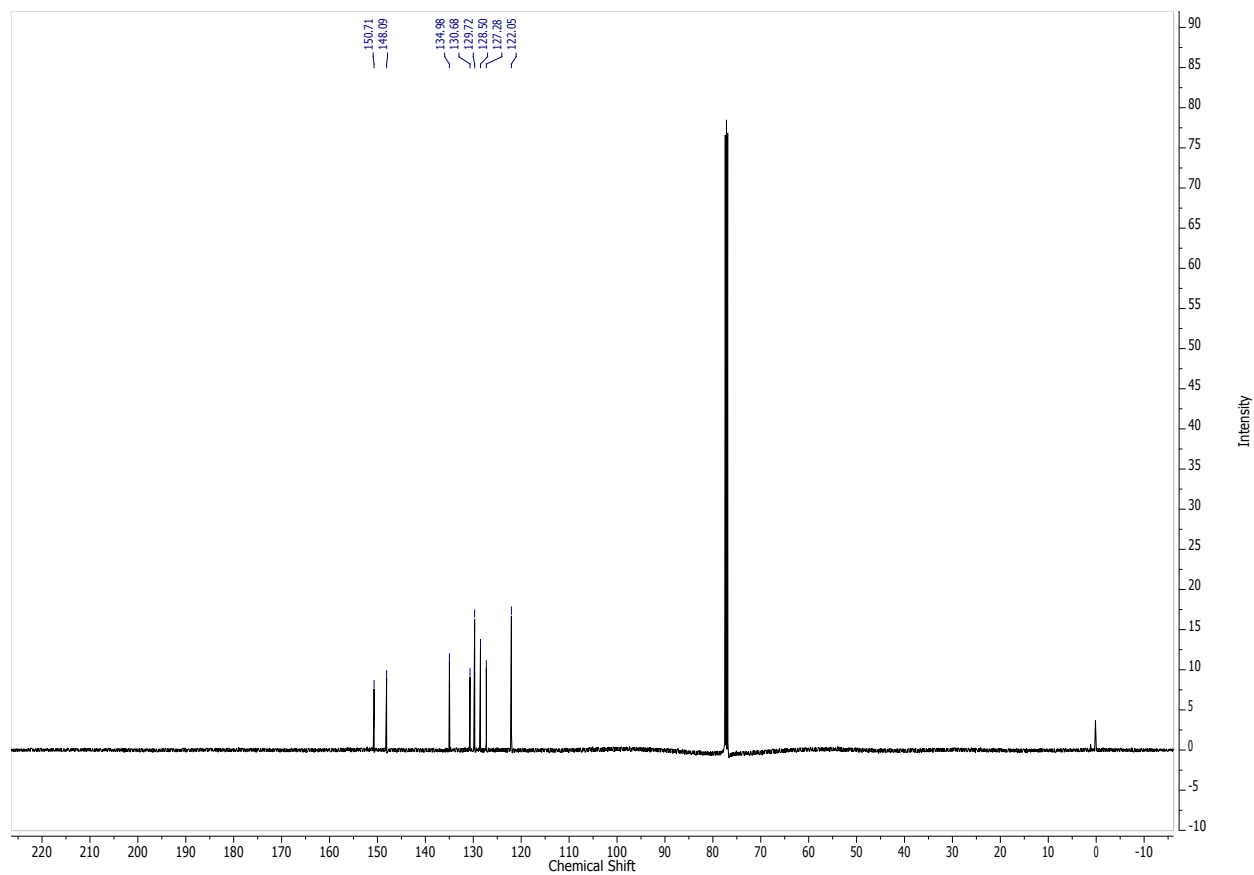

**Figure S9.** <sup>13</sup>C NMR (100 MHz, CDCl<sub>3</sub>) spectrum obtained at 296 K for Cl<sub>12</sub>BsubPc-O-BsubPc.

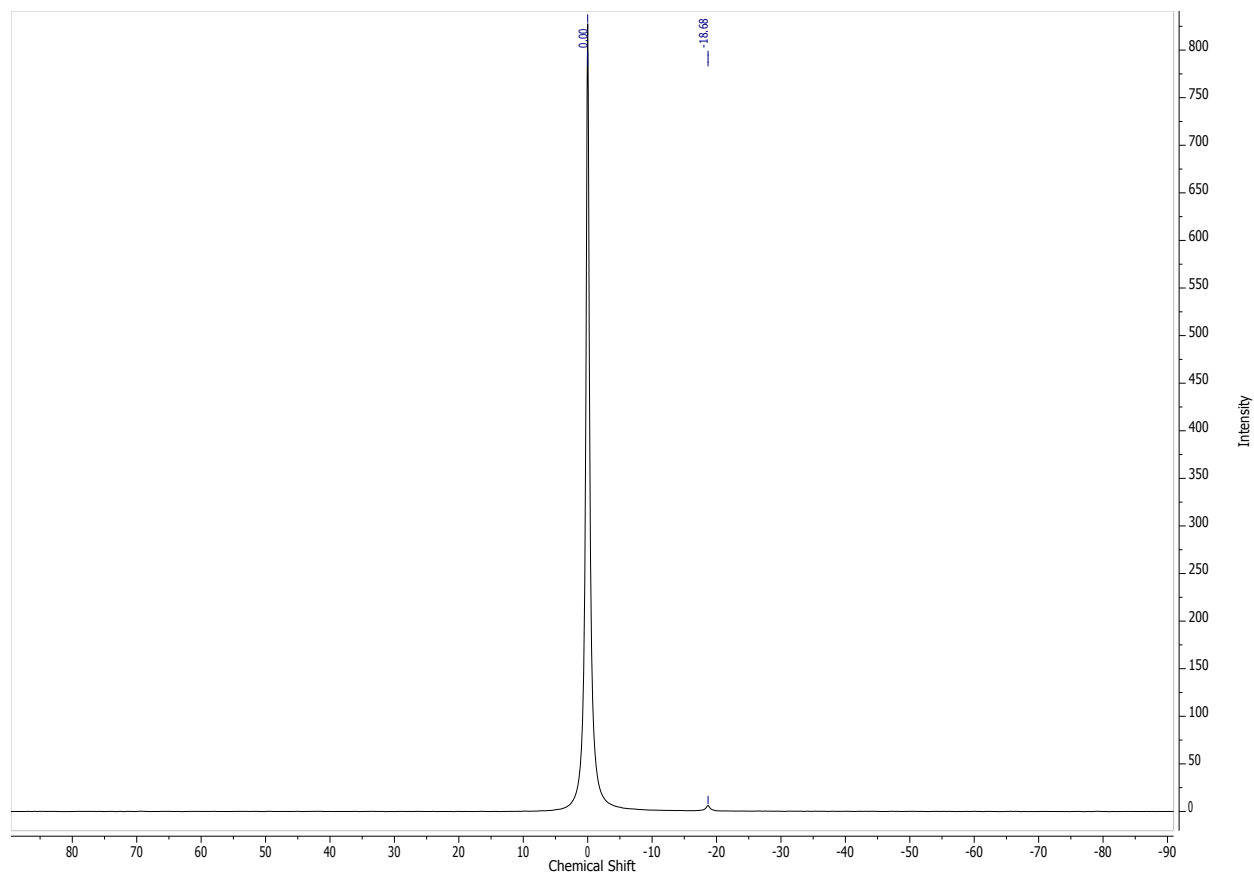

**Figure S10.**  $^{11}\text{B}$  NMR (400 MHz,  $\text{CDCl}_3$ , referenced to  $\text{BF}_3 \cdot \text{OEt}_2$ ) spectrum obtained at 296 K for  $\text{Cl}_{12}\text{BsubPc-O-BsubPc}$ .

## Wavelength of Maximum Absorption for Some Monomeric BsubPcs

Table S5.  $\lambda_{\max}$  Values for Some Monomeric BsubPc Compounds

| <b>BsubPc Compound</b>     | <b><math>\lambda_{\max}</math> (nm)</b> |
|----------------------------|-----------------------------------------|
| Br-BsubPc                  | 566                                     |
| Cl-BsubPc                  | 565                                     |
| F-BsubPc                   | 562                                     |
| PhO-BsubPc                 | 563                                     |
| HO-BsubPc                  | 561                                     |
| Br-F <sub>12</sub> BsubPc  | 578                                     |
| Cl-Cl <sub>6</sub> BsubPc  | 574                                     |
| Cl-Cl <sub>12</sub> BsubPc | 593                                     |

All measurements were done in toluene solutions at room temperature.

## UV-vis Absorption and Photoluminescence Plots

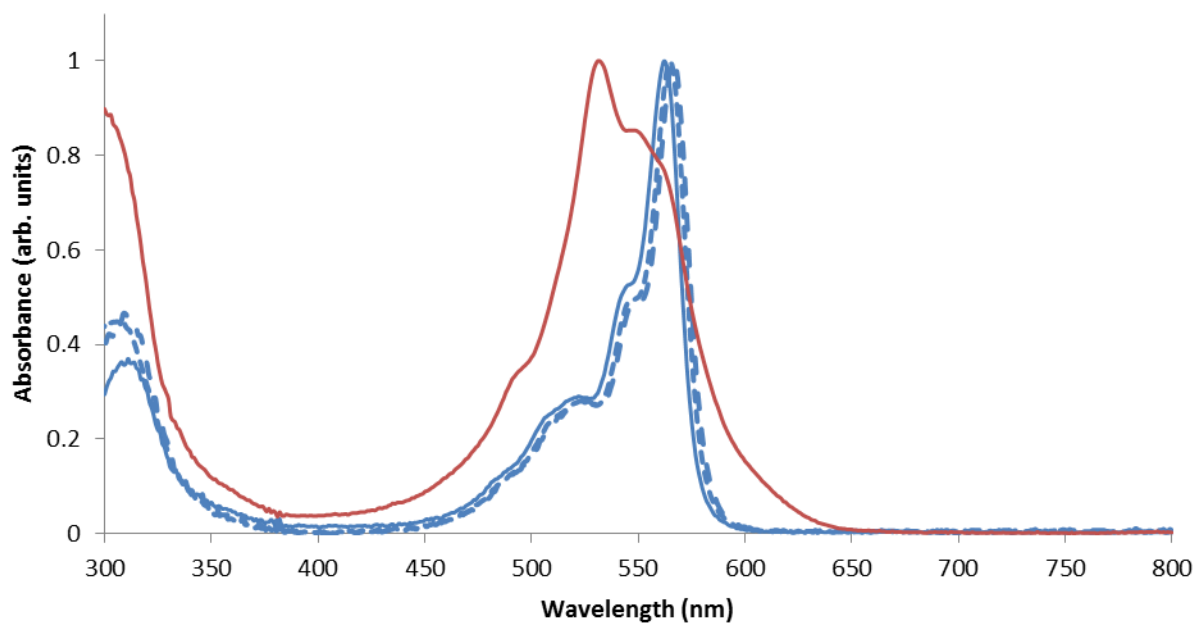

(a)

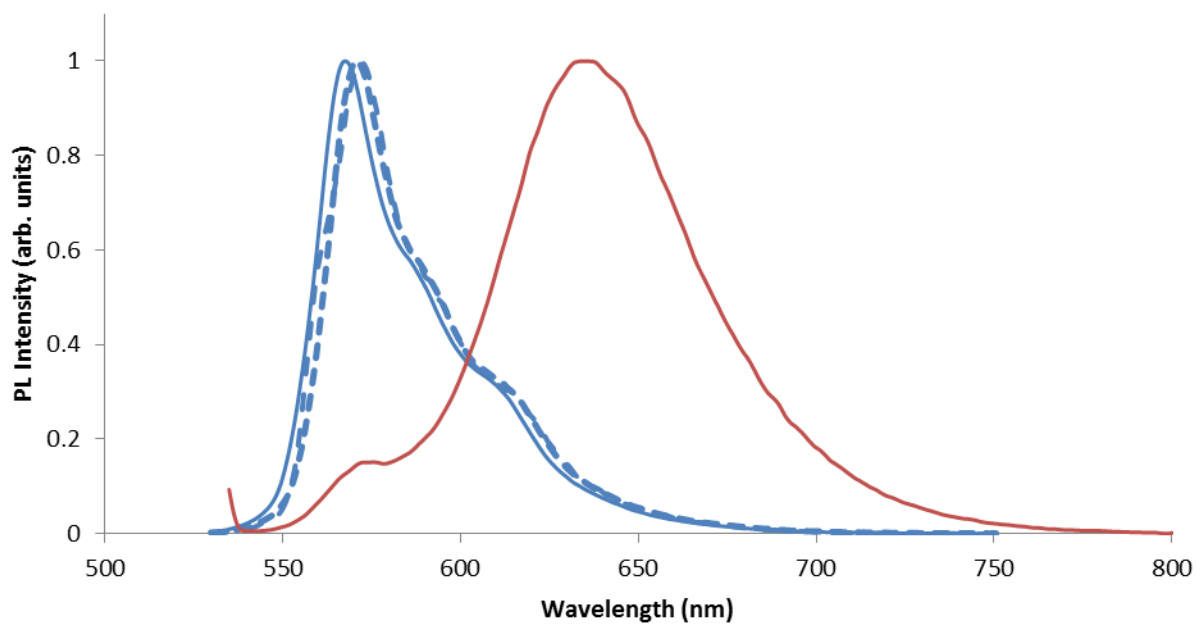

(b)

**Figure S11.** Overlay of  $\mu$ -oxo BsubPc's (red) and the halo-BsubPc's (blue; F- solid, Cl- dotted, Br- dashed) (a) normalized absorption spectra; and (b) photoluminescence (PL) spectra.<sup>9</sup>

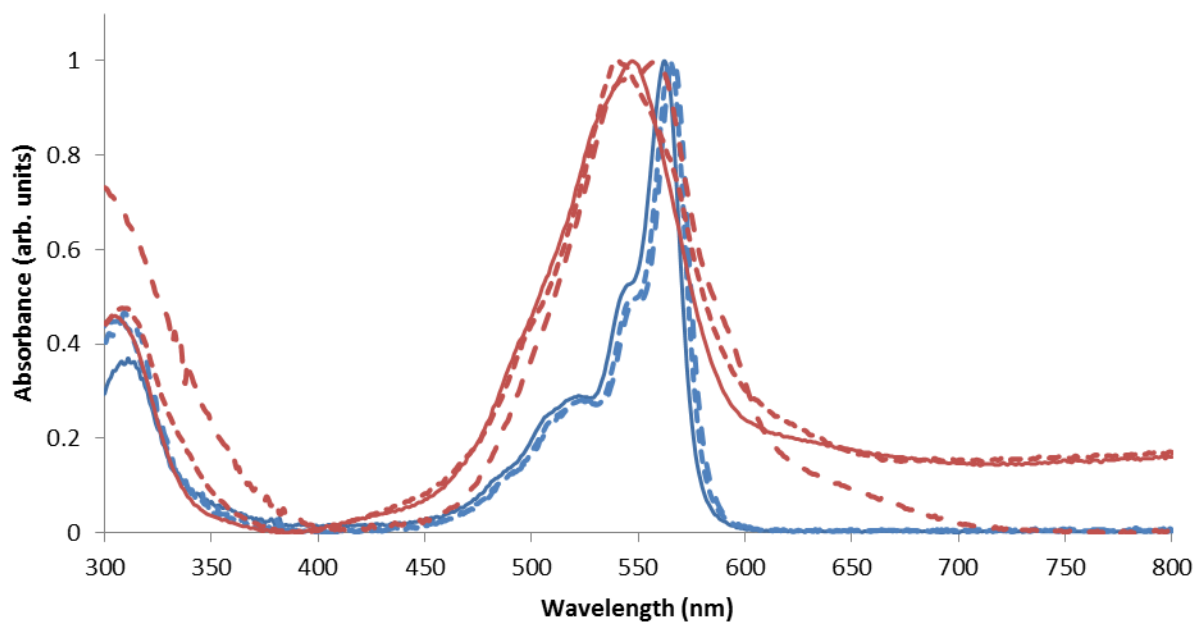

(a)

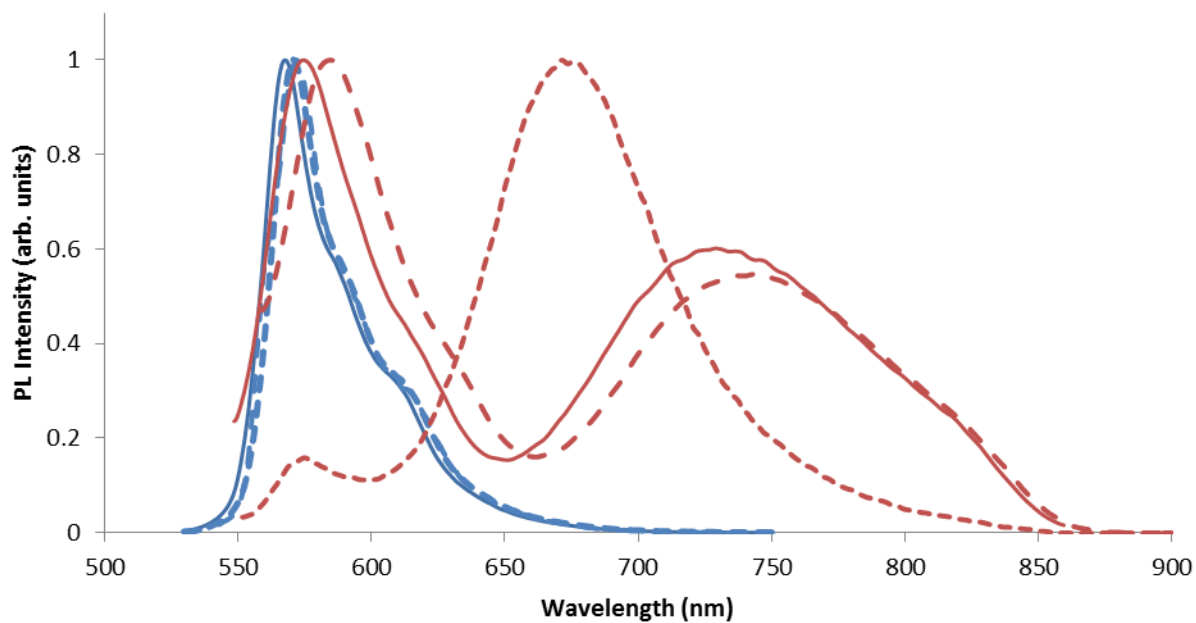

(b)

**Figure S12.** Overlay of  $F_{12}$ BsubPc-O-BsubPc's (solid red),  $Cl_6$ BsubPc-O-BsubPc's (dotted red), and  $Cl_{12}$ BsubPc-O-BsubPc's (dashed red) and the halo-BsubPc's (blue; F- solid, Cl- dotted, Br- dashed) (a) normalized absorption spectra; and (b) normalized photoluminescence (PL) spectra.

## Determination of Fluorescence Quantum Yields

The fluorescence quantum yields ( $\phi$ ) were calculated using the formula below:

$$\phi = \phi_R (I / I_R)(OD_R / OD)(n^2 / n_R^2) \quad (\text{Eq. S1})$$

where  $I$  is the integrated fluorescence intensity,  $OD$  is the optical density (*i.e.* absorbance), and  $n$  is the refractive index of the solvent. The subscript  $_R$  is PhO-F<sub>12</sub>BsubPc, a reference fluorophore, which has previously been reported to have a  $\phi = 0.40$ .<sup>11</sup> Integrated fluorescence intensity values were acquired from PerkinElmer FL WinLab (version 4.00.03) while the optical density values were acquired from PerkinElmer UV WinLab (version 6.02.0723).

## Crystal Structure Details of F<sub>12</sub>BsubPc-O-BsubPc

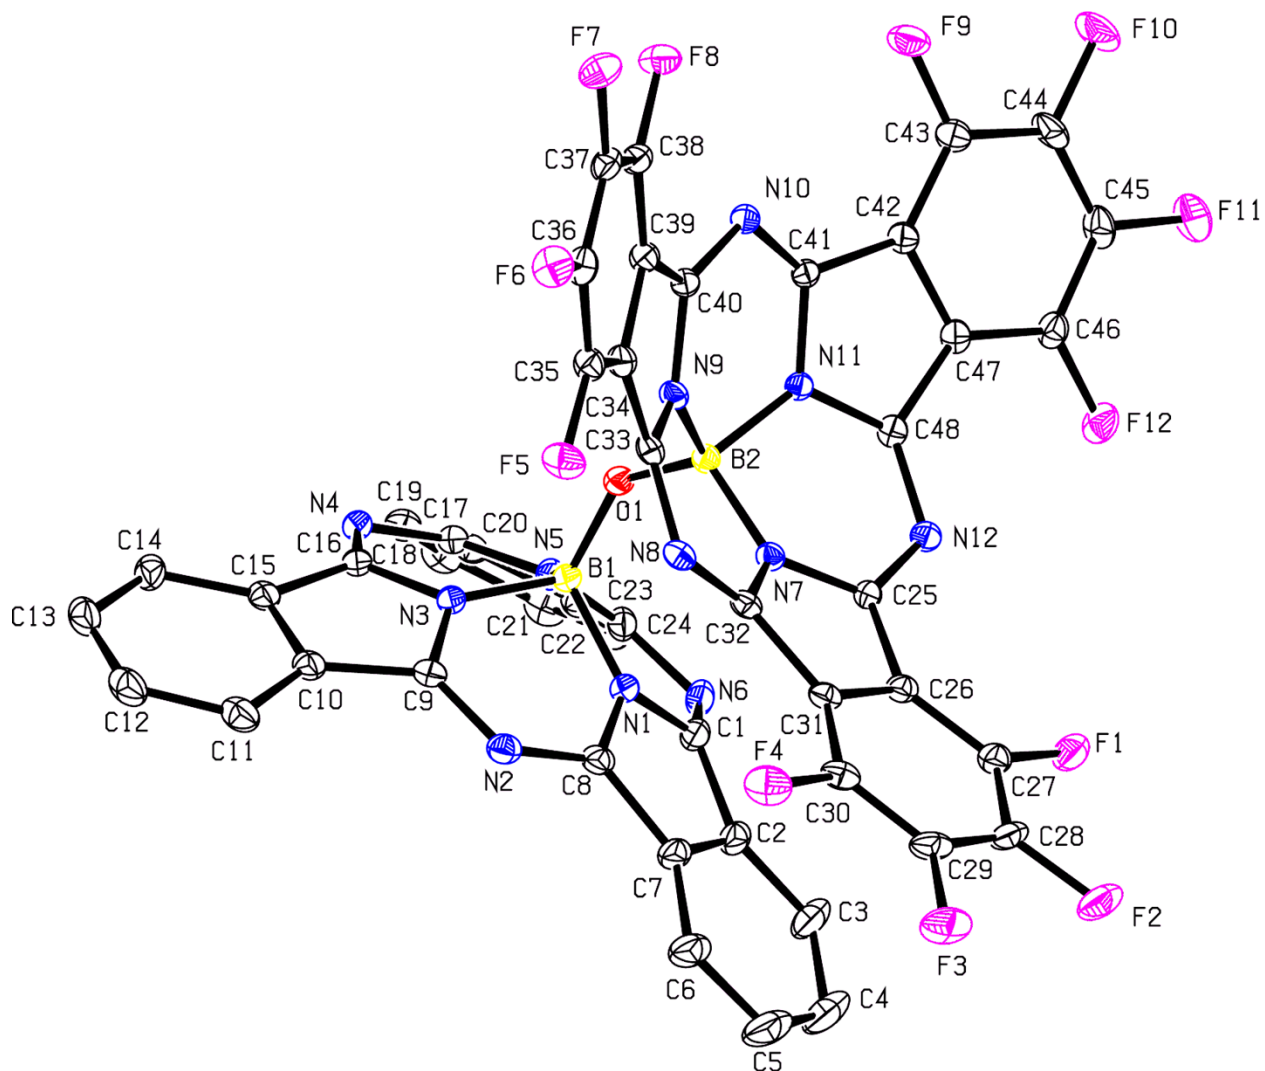

**Figure S13.** Thermal ellipsoid plot (50 % probability) showing the structure and atom numbering scheme of F<sub>12</sub>BsubPc-O-BsubPc·C<sub>7</sub>H<sub>16</sub> (CCDC deposition number: 1018494). Hydrogen atoms and solvent inclusions have been omitted for clarity. Colors: boron - yellow; nitrogen - blue; carbon - white; oxygen - red; fluorine - magenta.



**Table S6.** Crystal data and structure refinement for F<sub>12</sub>BsubPc-O-BsubPc.

|                                   |                                                                                  |                 |
|-----------------------------------|----------------------------------------------------------------------------------|-----------------|
| Empirical formula                 | C <sub>55</sub> H <sub>28</sub> B <sub>2</sub> F <sub>12</sub> N <sub>12</sub> O |                 |
| Formula weight                    | 1122.51                                                                          |                 |
| Temperature                       | 147(2) K                                                                         |                 |
| Wavelength                        | 1.54178 Å                                                                        |                 |
| Crystal system                    | Monoclinic                                                                       |                 |
| Space group                       | P 21/c                                                                           |                 |
| Unit cell dimensions              | a = 11.5201(4) Å                                                                 | a = 90°.        |
|                                   | b = 18.9039(7) Å                                                                 | b = 99.163(2)°. |
|                                   | c = 22.5091(9) Å                                                                 | g = 90°.        |
| Volume                            | 4839.4(3) Å <sup>3</sup>                                                         |                 |
| Z                                 | 4                                                                                |                 |
| Density (calculated)              | 1.541 Mg/m <sup>3</sup>                                                          |                 |
| Absorption coefficient            | 1.108 mm <sup>-1</sup>                                                           |                 |
| F(000)                            | 2272                                                                             |                 |
| Crystal size                      | 0.160 x 0.040 x 0.015 mm <sup>3</sup>                                            |                 |
| Theta range for data collection   | 3.069 to 66.755°.                                                                |                 |
| Index ranges                      | -13<=h<=13, -19<=k<=22, -26<=l<=26                                               |                 |
| Reflections collected             | 32959                                                                            |                 |
| Independent reflections           | 8365 [R(int) = 0.0562]                                                           |                 |
| Completeness to theta = 67.679°   | 95.4 %                                                                           |                 |
| Absorption correction             | Semi-empirical from equivalents                                                  |                 |
| Max. and min. transmission        | 0.7528 and 0.6549                                                                |                 |
| Refinement method                 | Full-matrix least-squares on F <sup>2</sup>                                      |                 |
| Data / restraints / parameters    | 8365 / 17 / 739                                                                  |                 |
| Goodness-of-fit on F <sup>2</sup> | 1.029                                                                            |                 |
| Final R indices [I>2sigma(I)]     | R1 = 0.0539, wR2 = 0.1395                                                        |                 |
| R indices (all data)              | R1 = 0.0760, wR2 = 0.1544                                                        |                 |
| Extinction coefficient            | n/a                                                                              |                 |
| Largest diff. peak and hole       | 0.998 and -0.665 e.Å <sup>-3</sup>                                               |                 |

**Table S7.** Atomic coordinates ( $\times 10^4$ ) and equivalent isotropic displacement parameters ( $\text{\AA}^2 \times 10^3$ ) for F<sub>12</sub>BsubPc-O-BsubPc. U(eq) is defined as one third of the trace of the orthogonalized U<sup>ij</sup> tensor.

|       | x        | y       | z       | U(eq) |
|-------|----------|---------|---------|-------|
| F(1)  | 6382(2)  | 5989(1) | 387(1)  | 38(1) |
| F(2)  | 4239(2)  | 6537(1) | -39(1)  | 46(1) |
| F(3)  | 2295(2)  | 6007(1) | 302(1)  | 47(1) |
| F(4)  | 2375(2)  | 4820(1) | 982(1)  | 42(1) |
| F(5)  | 2242(1)  | 2337(1) | 1375(1) | 35(1) |
| F(6)  | 1975(1)  | 988(1)  | 972(1)  | 36(1) |
| F(7)  | 3835(2)  | 198(1)  | 826(1)  | 35(1) |
| F(8)  | 6043(1)  | 719(1)  | 1078(1) | 34(1) |
| F(9)  | 9674(2)  | 1809(1) | 695(1)  | 39(1) |
| F(10) | 11273(2) | 2415(1) | 107(1)  | 48(1) |
| F(11) | 11440(2) | 3823(1) | 23(1)   | 48(1) |
| F(12) | 9954(2)  | 4684(1) | 524(1)  | 38(1) |
| O(1)  | 7099(2)  | 3644(1) | 2421(1) | 23(1) |
| N(1)  | 6463(2)  | 4870(1) | 2638(1) | 24(1) |
| N(2)  | 4568(2)  | 4646(1) | 2889(1) | 27(1) |
| N(3)  | 6214(2)  | 3954(1) | 3309(1) | 21(1) |
| N(4)  | 7801(2)  | 3672(1) | 4081(1) | 23(1) |
| N(5)  | 8105(2)  | 4371(1) | 3241(1) | 23(1) |
| N(6)  | 8293(2)  | 5465(1) | 2748(1) | 29(1) |
| N(7)  | 5980(2)  | 4134(1) | 1474(1) | 20(1) |
| N(8)  | 4141(2)  | 3567(1) | 1460(1) | 24(1) |
| N(9)  | 5924(2)  | 2908(1) | 1646(1) | 20(1) |
| N(10) | 7394(2)  | 2201(1) | 1309(1) | 22(1) |
| N(11) | 7647(2)  | 3440(1) | 1427(1) | 19(1) |
| N(12) | 7561(2)  | 4607(1) | 1036(1) | 23(1) |
| C(1)  | 7136(3)  | 5435(2) | 2538(1) | 27(1) |
| C(2)  | 6309(3)  | 5993(2) | 2315(1) | 32(1) |
| C(3)  | 6478(4)  | 6680(2) | 2121(2) | 44(1) |
| C(4)  | 5498(4)  | 7099(2) | 1966(2) | 56(1) |
| C(5)  | 4369(4)  | 6856(2) | 2006(2) | 54(1) |
| C(6)  | 4184(3)  | 6179(2) | 2211(2) | 41(1) |

|       |          |         |         |       |
|-------|----------|---------|---------|-------|
| C(7)  | 5168(3)  | 5743(2) | 2359(1) | 30(1) |
| C(8)  | 5301(3)  | 5034(2) | 2611(1) | 26(1) |
| C(9)  | 5060(2)  | 4140(2) | 3261(1) | 24(1) |
| C(10) | 4639(3)  | 3800(2) | 3772(1) | 26(1) |
| C(11) | 3530(3)  | 3762(2) | 3938(2) | 34(1) |
| C(12) | 3416(3)  | 3374(2) | 4444(2) | 39(1) |
| C(13) | 4380(3)  | 3059(2) | 4790(2) | 38(1) |
| C(14) | 5503(3)  | 3129(2) | 4656(1) | 31(1) |
| C(15) | 5630(3)  | 3493(2) | 4134(1) | 25(1) |
| C(16) | 6649(2)  | 3654(2) | 3848(1) | 22(1) |
| C(17) | 8497(2)  | 4075(2) | 3790(1) | 23(1) |
| C(18) | 9612(2)  | 4412(2) | 4010(1) | 25(1) |
| C(19) | 10411(2) | 4329(2) | 4536(1) | 28(1) |
| C(20) | 11350(3) | 4790(2) | 4640(2) | 35(1) |
| C(21) | 11497(3) | 5334(2) | 4237(2) | 36(1) |
| C(22) | 10704(3) | 5429(2) | 3717(1) | 32(1) |
| C(23) | 9769(3)  | 4964(2) | 3599(1) | 26(1) |
| C(24) | 8734(3)  | 4954(2) | 3129(1) | 26(1) |
| C(25) | 6461(2)  | 4648(1) | 1165(1) | 20(1) |
| C(26) | 5492(2)  | 5101(2) | 913(1)  | 23(1) |
| C(27) | 5426(3)  | 5694(2) | 546(1)  | 28(1) |
| C(28) | 4339(3)  | 5978(2) | 336(1)  | 32(1) |
| C(29) | 3323(3)  | 5691(2) | 495(1)  | 33(1) |
| C(30) | 3370(2)  | 5092(2) | 845(1)  | 28(1) |
| C(31) | 4449(2)  | 4791(2) | 1054(1) | 23(1) |
| C(32) | 4781(2)  | 4139(2) | 1378(1) | 22(1) |
| C(33) | 4719(2)  | 2956(2) | 1558(1) | 23(1) |
| C(34) | 4307(2)  | 2239(2) | 1421(1) | 24(1) |
| C(35) | 3185(2)  | 1957(2) | 1298(1) | 26(1) |
| C(36) | 3046(2)  | 1271(2) | 1102(1) | 27(1) |
| C(37) | 4013(3)  | 862(2)  | 1028(1) | 26(1) |
| C(38) | 5139(2)  | 1128(2) | 1158(1) | 25(1) |
| C(39) | 5297(2)  | 1819(2) | 1357(1) | 23(1) |
| C(40) | 6326(2)  | 2282(1) | 1468(1) | 20(1) |
| C(41) | 8011(2)  | 2794(2) | 1263(1) | 20(1) |
| C(42) | 8981(2)  | 2936(2) | 935(1)  | 23(1) |

|       |          |         |          |         |
|-------|----------|---------|----------|---------|
| C(43) | 9715(2)  | 2512(2) | 661(1)   | 28(1)   |
| C(44) | 10529(3) | 2820(2) | 357(1)   | 34(1)   |
| C(45) | 10620(3) | 3549(2) | 316(1)   | 34(1)   |
| C(46) | 9881(2)  | 3983(2) | 570(1)   | 28(1)   |
| C(47) | 9058(2)  | 3683(2) | 877(1)   | 24(1)   |
| C(48) | 8107(2)  | 3987(2) | 1147(1)  | 22(1)   |
| B(1)  | 6976(3)  | 4168(2) | 2857(1)  | 21(1)   |
| B(2)  | 6695(3)  | 3549(2) | 1809(1)  | 21(1)   |
| C(1S) | -805(11) | 1495(8) | 3616(7)  | 249(7)  |
| C(2S) | 40(20)   | 1634(6) | 3180(11) | 431(18) |
| C(3S) | -190(12) | 2429(6) | 3095(4)  | 213(5)  |
| C(4S) | 479(9)   | 2723(6) | 2626(6)  | 219(5)  |
| C(5S) | 568(9)   | 3521(6) | 2621(4)  | 187(4)  |
| C(6S) | 1445(8)  | 3791(7) | 2246(5)  | 209(5)  |
| C(7S) | 1296(9)  | 4584(7) | 2234(4)  | 187(4)  |

---

**Table S8.** Bond lengths [ $\text{\AA}$ ] and angles [ $^\circ$ ] for  $\text{F}_{12}\text{BsubPc-O-BsubPc}$ .

---

|             |          |
|-------------|----------|
| F(1)-C(27)  | 1.334(4) |
| F(2)-C(28)  | 1.346(4) |
| F(3)-C(29)  | 1.335(3) |
| F(4)-C(30)  | 1.338(4) |
| F(5)-C(35)  | 1.336(3) |
| F(6)-C(36)  | 1.334(3) |
| F(7)-C(37)  | 1.339(3) |
| F(8)-C(38)  | 1.332(3) |
| F(9)-C(43)  | 1.332(4) |
| F(10)-C(44) | 1.340(3) |
| F(11)-C(45) | 1.339(3) |
| F(12)-C(46) | 1.333(4) |
| O(1)-B(2)   | 1.393(4) |
| O(1)-B(1)   | 1.418(4) |
| N(1)-C(1)   | 1.360(4) |
| N(1)-C(8)   | 1.366(4) |
| N(1)-B(1)   | 1.503(4) |
| N(2)-C(9)   | 1.337(4) |
| N(2)-C(8)   | 1.345(4) |
| N(3)-C(16)  | 1.360(4) |
| N(3)-C(9)   | 1.362(4) |
| N(3)-B(1)   | 1.502(4) |
| N(4)-C(16)  | 1.348(4) |
| N(4)-C(17)  | 1.349(4) |
| N(5)-C(24)  | 1.364(4) |
| N(5)-C(17)  | 1.367(4) |
| N(5)-B(1)   | 1.492(4) |
| N(6)-C(24)  | 1.338(4) |
| N(6)-C(1)   | 1.343(4) |
| N(7)-C(32)  | 1.363(3) |
| N(7)-C(25)  | 1.364(4) |
| N(7)-B(2)   | 1.507(4) |
| N(8)-C(33)  | 1.332(4) |
| N(8)-C(32)  | 1.339(4) |

|              |          |
|--------------|----------|
| N(9)-C(40)   | 1.355(4) |
| N(9)-C(33)   | 1.373(3) |
| N(9)-B(2)    | 1.512(4) |
| N(10)-C(41)  | 1.339(4) |
| N(10)-C(40)  | 1.344(3) |
| N(11)-C(41)  | 1.361(4) |
| N(11)-C(48)  | 1.362(4) |
| N(11)-B(2)   | 1.512(4) |
| N(12)-C(48)  | 1.336(4) |
| N(12)-C(25)  | 1.347(3) |
| C(1)-C(2)    | 1.456(4) |
| C(2)-C(3)    | 1.393(5) |
| C(2)-C(7)    | 1.415(5) |
| C(3)-C(4)    | 1.378(6) |
| C(3)-H(3A)   | 0.9500   |
| C(4)-C(5)    | 1.396(6) |
| C(4)-H(4A)   | 0.9500   |
| C(5)-C(6)    | 1.388(5) |
| C(5)-H(5A)   | 0.9500   |
| C(6)-C(7)    | 1.398(5) |
| C(6)-H(6A)   | 0.9500   |
| C(7)-C(8)    | 1.455(4) |
| C(9)-C(10)   | 1.465(4) |
| C(10)-C(11)  | 1.390(4) |
| C(10)-C(15)  | 1.417(4) |
| C(11)-C(12)  | 1.379(5) |
| C(11)-H(11A) | 0.9500   |
| C(12)-C(13)  | 1.386(5) |
| C(12)-H(12A) | 0.9500   |
| C(13)-C(14)  | 1.381(5) |
| C(13)-H(13A) | 0.9500   |
| C(14)-C(15)  | 1.389(4) |
| C(14)-H(14A) | 0.9500   |
| C(15)-C(16)  | 1.458(4) |
| C(17)-C(18)  | 1.448(4) |
| C(18)-C(19)  | 1.388(4) |

|              |          |
|--------------|----------|
| C(18)-C(23)  | 1.424(4) |
| C(19)-C(20)  | 1.380(5) |
| C(19)-H(19A) | 0.9500   |
| C(20)-C(21)  | 1.400(5) |
| C(20)-H(20A) | 0.9500   |
| C(21)-C(22)  | 1.377(5) |
| C(21)-H(21A) | 0.9500   |
| C(22)-C(23)  | 1.384(4) |
| C(22)-H(22A) | 0.9500   |
| C(23)-C(24)  | 1.463(4) |
| C(25)-C(26)  | 1.448(4) |
| C(26)-C(27)  | 1.388(4) |
| C(26)-C(31)  | 1.418(4) |
| C(27)-C(28)  | 1.375(4) |
| C(28)-C(29)  | 1.388(5) |
| C(29)-C(30)  | 1.375(5) |
| C(30)-C(31)  | 1.380(4) |
| C(31)-C(32)  | 1.452(4) |
| C(33)-C(34)  | 1.453(4) |
| C(34)-C(35)  | 1.385(4) |
| C(34)-C(39)  | 1.416(4) |
| C(35)-C(36)  | 1.372(4) |
| C(36)-C(37)  | 1.388(4) |
| C(37)-C(38)  | 1.378(4) |
| C(38)-C(39)  | 1.382(4) |
| C(39)-C(40)  | 1.463(4) |
| C(41)-C(42)  | 1.459(4) |
| C(42)-C(43)  | 1.380(4) |
| C(42)-C(47)  | 1.423(4) |
| C(43)-C(44)  | 1.376(4) |
| C(44)-C(45)  | 1.386(5) |
| C(45)-C(46)  | 1.372(4) |
| C(46)-C(47)  | 1.381(4) |
| C(47)-C(48)  | 1.453(4) |
| C(1S)-C(2S)  | 1.511(5) |
| C(1S)-H(1SA) | 0.9800   |

|                  |          |
|------------------|----------|
| C(1S)-H(1SB)     | 0.9800   |
| C(1S)-H(1SC)     | 0.9800   |
| C(2S)-C(3S)      | 1.532(5) |
| C(2S)-H(2SA)     | 0.9900   |
| C(2S)-H(2SB)     | 0.9900   |
| C(3S)-C(4S)      | 1.509(5) |
| C(3S)-H(3SA)     | 0.9900   |
| C(3S)-H(3SB)     | 0.9900   |
| C(4S)-C(5S)      | 1.513(5) |
| C(4S)-H(4SA)     | 0.9900   |
| C(4S)-H(4SB)     | 0.9900   |
| C(5S)-C(6S)      | 1.504(5) |
| C(5S)-H(5SA)     | 0.9900   |
| C(5S)-H(5SB)     | 0.9900   |
| C(6S)-C(7S)      | 1.509(5) |
| C(6S)-H(6SA)     | 0.9900   |
| C(6S)-H(6SB)     | 0.9900   |
| C(7S)-H(7SA)     | 0.9800   |
| C(7S)-H(7SB)     | 0.9800   |
| C(7S)-H(7SC)     | 0.9800   |
|                  |          |
| B(2)-O(1)-B(1)   | 136.1(2) |
| C(1)-N(1)-C(8)   | 113.2(2) |
| C(1)-N(1)-B(1)   | 122.9(2) |
| C(8)-N(1)-B(1)   | 123.1(2) |
| C(9)-N(2)-C(8)   | 116.5(2) |
| C(16)-N(3)-C(9)  | 113.3(2) |
| C(16)-N(3)-B(1)  | 123.0(2) |
| C(9)-N(3)-B(1)   | 123.0(2) |
| C(16)-N(4)-C(17) | 116.7(2) |
| C(24)-N(5)-C(17) | 112.9(2) |
| C(24)-N(5)-B(1)  | 122.7(2) |
| C(17)-N(5)-B(1)  | 123.4(2) |
| C(24)-N(6)-C(1)  | 116.7(3) |
| C(32)-N(7)-C(25) | 113.4(2) |
| C(32)-N(7)-B(2)  | 122.9(2) |



|                   |          |
|-------------------|----------|
| C(25)-N(7)-B(2)   | 123.0(2) |
| C(33)-N(8)-C(32)  | 116.8(2) |
| C(40)-N(9)-C(33)  | 113.6(2) |
| C(40)-N(9)-B(2)   | 123.8(2) |
| C(33)-N(9)-B(2)   | 121.5(2) |
| C(41)-N(10)-C(40) | 116.4(2) |
| C(41)-N(11)-C(48) | 113.4(2) |
| C(41)-N(11)-B(2)  | 124.0(2) |
| C(48)-N(11)-B(2)  | 122.1(2) |
| C(48)-N(12)-C(25) | 116.2(2) |
| N(6)-C(1)-N(1)    | 122.3(3) |
| N(6)-C(1)-C(2)    | 130.4(3) |
| N(1)-C(1)-C(2)    | 105.6(3) |
| C(3)-C(2)-C(7)    | 120.7(3) |
| C(3)-C(2)-C(1)    | 131.9(3) |
| C(7)-C(2)-C(1)    | 107.3(3) |
| C(4)-C(3)-C(2)    | 117.8(4) |
| C(4)-C(3)-H(3A)   | 121.1    |
| C(2)-C(3)-H(3A)   | 121.1    |
| C(3)-C(4)-C(5)    | 121.9(3) |
| C(3)-C(4)-H(4A)   | 119.1    |
| C(5)-C(4)-H(4A)   | 119.1    |
| C(6)-C(5)-C(4)    | 121.3(4) |
| C(6)-C(5)-H(5A)   | 119.4    |
| C(4)-C(5)-H(5A)   | 119.4    |
| C(5)-C(6)-C(7)    | 117.4(4) |
| C(5)-C(6)-H(6A)   | 121.3    |
| C(7)-C(6)-H(6A)   | 121.3    |
| C(6)-C(7)-C(2)    | 120.9(3) |
| C(6)-C(7)-C(8)    | 131.8(3) |
| C(2)-C(7)-C(8)    | 107.2(3) |
| N(2)-C(8)-N(1)    | 122.6(3) |
| N(2)-C(8)-C(7)    | 130.5(3) |
| N(1)-C(8)-C(7)    | 105.5(3) |
| N(2)-C(9)-N(3)    | 123.1(3) |
| N(2)-C(9)-C(10)   | 130.2(3) |

|                    |          |
|--------------------|----------|
| N(3)-C(9)-C(10)    | 105.3(2) |
| C(11)-C(10)-C(15)  | 121.0(3) |
| C(11)-C(10)-C(9)   | 131.8(3) |
| C(15)-C(10)-C(9)   | 107.1(2) |
| C(12)-C(11)-C(10)  | 117.5(3) |
| C(12)-C(11)-H(11A) | 121.2    |
| C(10)-C(11)-H(11A) | 121.2    |
| C(11)-C(12)-C(13)  | 121.4(3) |
| C(11)-C(12)-H(12A) | 119.3    |
| C(13)-C(12)-H(12A) | 119.3    |
| C(14)-C(13)-C(12)  | 122.0(3) |
| C(14)-C(13)-H(13A) | 119.0    |
| C(12)-C(13)-H(13A) | 119.0    |
| C(13)-C(14)-C(15)  | 117.5(3) |
| C(13)-C(14)-H(14A) | 121.3    |
| C(15)-C(14)-H(14A) | 121.3    |
| C(14)-C(15)-C(10)  | 120.4(3) |
| C(14)-C(15)-C(16)  | 132.7(3) |
| C(10)-C(15)-C(16)  | 106.9(2) |
| N(4)-C(16)-N(3)    | 122.5(2) |
| N(4)-C(16)-C(15)   | 130.2(3) |
| N(3)-C(16)-C(15)   | 105.8(2) |
| N(4)-C(17)-N(5)    | 122.3(2) |
| N(4)-C(17)-C(18)   | 130.2(3) |
| N(5)-C(17)-C(18)   | 106.1(2) |
| C(19)-C(18)-C(23)  | 120.1(3) |
| C(19)-C(18)-C(17)  | 132.3(3) |
| C(23)-C(18)-C(17)  | 107.3(2) |
| C(20)-C(19)-C(18)  | 118.0(3) |
| C(20)-C(19)-H(19A) | 121.0    |
| C(18)-C(19)-H(19A) | 121.0    |
| C(19)-C(20)-C(21)  | 121.7(3) |
| C(19)-C(20)-H(20A) | 119.1    |
| C(21)-C(20)-H(20A) | 119.1    |
| C(22)-C(21)-C(20)  | 121.0(3) |
| C(22)-C(21)-H(21A) | 119.5    |

|                    |          |
|--------------------|----------|
| C(20)-C(21)-H(21A) | 119.5    |
| C(21)-C(22)-C(23)  | 118.1(3) |
| C(21)-C(22)-H(22A) | 121.0    |
| C(23)-C(22)-H(22A) | 121.0    |
| C(22)-C(23)-C(18)  | 121.1(3) |
| C(22)-C(23)-C(24)  | 131.8(3) |
| C(18)-C(23)-C(24)  | 106.7(2) |
| N(6)-C(24)-N(5)    | 122.9(3) |
| N(6)-C(24)-C(23)   | 129.5(3) |
| N(5)-C(24)-C(23)   | 105.8(2) |
| N(12)-C(25)-N(7)   | 122.8(2) |
| N(12)-C(25)-C(26)  | 130.0(2) |
| N(7)-C(25)-C(26)   | 105.7(2) |
| C(27)-C(26)-C(31)  | 119.9(3) |
| C(27)-C(26)-C(25)  | 132.6(3) |
| C(31)-C(26)-C(25)  | 107.2(2) |
| F(1)-C(27)-C(28)   | 119.3(3) |
| F(1)-C(27)-C(26)   | 121.9(3) |
| C(28)-C(27)-C(26)  | 118.8(3) |
| F(2)-C(28)-C(27)   | 120.3(3) |
| F(2)-C(28)-C(29)   | 118.5(3) |
| C(27)-C(28)-C(29)  | 121.2(3) |
| F(3)-C(29)-C(30)   | 120.4(3) |
| F(3)-C(29)-C(28)   | 118.9(3) |
| C(30)-C(29)-C(28)  | 120.7(3) |
| F(4)-C(30)-C(29)   | 119.5(3) |
| F(4)-C(30)-C(31)   | 121.4(3) |
| C(29)-C(30)-C(31)  | 119.1(3) |
| C(30)-C(31)-C(26)  | 120.1(3) |
| C(30)-C(31)-C(32)  | 132.3(3) |
| C(26)-C(31)-C(32)  | 107.3(2) |
| N(8)-C(32)-N(7)    | 122.6(2) |
| N(8)-C(32)-C(31)   | 130.5(2) |
| N(7)-C(32)-C(31)   | 105.4(2) |
| N(8)-C(33)-N(9)    | 123.2(3) |
| N(8)-C(33)-C(34)   | 129.4(2) |

|                   |          |
|-------------------|----------|
| N(9)-C(33)-C(34)  | 104.9(2) |
| C(35)-C(34)-C(39) | 120.3(3) |
| C(35)-C(34)-C(33) | 131.7(3) |
| C(39)-C(34)-C(33) | 107.7(2) |
| F(5)-C(35)-C(36)  | 119.6(3) |
| F(5)-C(35)-C(34)  | 121.3(3) |
| C(36)-C(35)-C(34) | 119.1(3) |
| F(6)-C(36)-C(35)  | 120.5(3) |
| F(6)-C(36)-C(37)  | 118.9(3) |
| C(35)-C(36)-C(37) | 120.7(3) |
| F(7)-C(37)-C(38)  | 120.2(3) |
| F(7)-C(37)-C(36)  | 118.6(3) |
| C(38)-C(37)-C(36) | 121.2(3) |
| F(8)-C(38)-C(37)  | 119.2(3) |
| F(8)-C(38)-C(39)  | 121.8(3) |
| C(37)-C(38)-C(39) | 119.0(3) |
| C(38)-C(39)-C(34) | 119.8(3) |
| C(38)-C(39)-C(40) | 133.0(3) |
| C(34)-C(39)-C(40) | 106.9(2) |
| N(10)-C(40)-N(9)  | 123.3(2) |
| N(10)-C(40)-C(39) | 129.6(2) |
| N(9)-C(40)-C(39)  | 105.5(2) |
| N(10)-C(41)-N(11) | 122.7(2) |
| N(10)-C(41)-C(42) | 130.6(3) |
| N(11)-C(41)-C(42) | 105.4(2) |
| C(43)-C(42)-C(47) | 118.9(3) |
| C(43)-C(42)-C(41) | 133.9(3) |
| C(47)-C(42)-C(41) | 107.1(2) |
| F(9)-C(43)-C(44)  | 119.0(3) |
| F(9)-C(43)-C(42)  | 121.5(3) |
| C(44)-C(43)-C(42) | 119.4(3) |
| F(10)-C(44)-C(43) | 119.9(3) |
| F(10)-C(44)-C(45) | 118.7(3) |
| C(43)-C(44)-C(45) | 121.3(3) |
| F(11)-C(45)-C(46) | 120.5(3) |
| F(11)-C(45)-C(44) | 119.0(3) |

|                     |          |
|---------------------|----------|
| C(46)-C(45)-C(44)   | 120.5(3) |
| F(12)-C(46)-C(45)   | 120.7(3) |
| F(12)-C(46)-C(47)   | 120.3(3) |
| C(45)-C(46)-C(47)   | 119.0(3) |
| C(46)-C(47)-C(42)   | 120.8(3) |
| C(46)-C(47)-C(48)   | 132.1(3) |
| C(42)-C(47)-C(48)   | 107.0(2) |
| N(12)-C(48)-N(11)   | 123.2(2) |
| N(12)-C(48)-C(47)   | 129.3(3) |
| N(11)-C(48)-C(47)   | 105.6(2) |
| O(1)-B(1)-N(5)      | 114.0(2) |
| O(1)-B(1)-N(3)      | 114.6(2) |
| N(5)-B(1)-N(3)      | 103.1(2) |
| O(1)-B(1)-N(1)      | 117.8(2) |
| N(5)-B(1)-N(1)      | 102.9(2) |
| N(3)-B(1)-N(1)      | 102.6(2) |
| O(1)-B(2)-N(7)      | 118.0(2) |
| O(1)-B(2)-N(9)      | 115.8(2) |
| N(7)-B(2)-N(9)      | 102.3(2) |
| O(1)-B(2)-N(11)     | 114.9(2) |
| N(7)-B(2)-N(11)     | 101.8(2) |
| N(9)-B(2)-N(11)     | 101.7(2) |
| C(2S)-C(1S)-H(1SA)  | 109.5    |
| C(2S)-C(1S)-H(1SB)  | 109.5    |
| H(1SA)-C(1S)-H(1SB) | 109.5    |
| C(2S)-C(1S)-H(1SC)  | 109.5    |
| H(1SA)-C(1S)-H(1SC) | 109.5    |
| H(1SB)-C(1S)-H(1SC) | 109.5    |
| C(1S)-C(2S)-C(3S)   | 97.8(10) |
| C(1S)-C(2S)-H(2SA)  | 112.2    |
| C(3S)-C(2S)-H(2SA)  | 112.2    |
| C(1S)-C(2S)-H(2SB)  | 112.2    |
| C(3S)-C(2S)-H(2SB)  | 112.2    |
| H(2SA)-C(2S)-H(2SB) | 109.8    |
| C(4S)-C(3S)-C(2S)   | 110.5(8) |
| C(4S)-C(3S)-H(3SA)  | 109.5    |

|                     |           |
|---------------------|-----------|
| C(2S)-C(3S)-H(3SA)  | 109.5     |
| C(4S)-C(3S)-H(3SB)  | 109.5     |
| C(2S)-C(3S)-H(3SB)  | 109.5     |
| H(3SA)-C(3S)-H(3SB) | 108.1     |
| C(3S)-C(4S)-C(5S)   | 114.5(10) |
| C(3S)-C(4S)-H(4SA)  | 108.6     |
| C(5S)-C(4S)-H(4SA)  | 108.6     |
| C(3S)-C(4S)-H(4SB)  | 108.6     |
| C(5S)-C(4S)-H(4SB)  | 108.6     |
| H(4SA)-C(4S)-H(4SB) | 107.6     |
| C(6S)-C(5S)-C(4S)   | 113.3(8)  |
| C(6S)-C(5S)-H(5SA)  | 108.9     |
| C(4S)-C(5S)-H(5SA)  | 108.9     |
| C(6S)-C(5S)-H(5SB)  | 108.9     |
| C(4S)-C(5S)-H(5SB)  | 108.9     |
| H(5SA)-C(5S)-H(5SB) | 107.7     |
| C(5S)-C(6S)-C(7S)   | 105.2(8)  |
| C(5S)-C(6S)-H(6SA)  | 110.7     |
| C(7S)-C(6S)-H(6SA)  | 110.7     |
| C(5S)-C(6S)-H(6SB)  | 110.7     |
| C(7S)-C(6S)-H(6SB)  | 110.7     |
| H(6SA)-C(6S)-H(6SB) | 108.8     |
| C(6S)-C(7S)-H(7SA)  | 109.5     |
| C(6S)-C(7S)-H(7SB)  | 109.5     |
| H(7SA)-C(7S)-H(7SB) | 109.5     |
| C(6S)-C(7S)-H(7SC)  | 109.5     |
| H(7SA)-C(7S)-H(7SC) | 109.5     |
| H(7SB)-C(7S)-H(7SC) | 109.5     |

---

Symmetry transformations used to generate equivalent atoms:

**Table S9.** Anisotropic displacement parameters ( $\text{\AA}^2 \times 10^3$ ) for F<sub>12</sub>BsubPc-O-BsubPc. The anisotropic displacement factor exponent takes the form:  $-2p^2[ h^2 a^*2U^{11} + \dots + 2 h k a^* b^* U^{12} ]$

|       | U <sup>11</sup> | U <sup>22</sup> | U <sup>33</sup> | U <sup>23</sup> | U <sup>13</sup> | U <sup>12</sup> |
|-------|-----------------|-----------------|-----------------|-----------------|-----------------|-----------------|
| F(1)  | 41(1)           | 28(1)           | 45(1)           | 10(1)           | 11(1)           | 1(1)            |
| F(2)  | 57(1)           | 30(1)           | 47(1)           | 11(1)           | -4(1)           | 13(1)           |
| F(3)  | 36(1)           | 48(1)           | 52(1)           | 0(1)            | -10(1)          | 21(1)           |
| F(4)  | 21(1)           | 49(1)           | 55(1)           | -2(1)           | 4(1)            | 6(1)            |
| F(5)  | 19(1)           | 39(1)           | 50(1)           | -5(1)           | 10(1)           | 1(1)            |
| F(6)  | 26(1)           | 36(1)           | 45(1)           | -1(1)           | 5(1)            | -9(1)           |
| F(7)  | 36(1)           | 22(1)           | 45(1)           | 0(1)            | 0(1)            | -5(1)           |
| F(8)  | 28(1)           | 24(1)           | 49(1)           | -1(1)           | 9(1)            | 3(1)            |
| F(9)  | 36(1)           | 31(1)           | 54(1)           | -4(1)           | 20(1)           | 7(1)            |
| F(10) | 37(1)           | 55(1)           | 60(1)           | -8(1)           | 31(1)           | 8(1)            |
| F(11) | 34(1)           | 60(1)           | 58(1)           | 5(1)            | 31(1)           | -5(1)           |
| F(12) | 30(1)           | 35(1)           | 50(1)           | 13(1)           | 15(1)           | -2(1)           |
| O(1)  | 27(1)           | 22(1)           | 21(1)           | 1(1)            | 2(1)            | 5(1)            |
| N(1)  | 31(1)           | 20(1)           | 21(1)           | 1(1)            | 6(1)            | 3(1)            |
| N(2)  | 29(1)           | 25(1)           | 26(1)           | -3(1)           | 3(1)            | 3(1)            |
| N(3)  | 24(1)           | 18(1)           | 21(1)           | -1(1)           | 5(1)            | -1(1)           |
| N(4)  | 26(1)           | 20(1)           | 24(1)           | 1(1)            | 6(1)            | -1(1)           |
| N(5)  | 26(1)           | 22(1)           | 21(1)           | 1(1)            | 5(1)            | -2(1)           |
| N(6)  | 38(1)           | 27(1)           | 23(1)           | 4(1)            | 7(1)            | -4(1)           |
| N(7)  | 17(1)           | 22(1)           | 21(1)           | 0(1)            | 4(1)            | 2(1)            |
| N(8)  | 20(1)           | 26(1)           | 25(1)           | -3(1)           | 7(1)            | 2(1)            |
| N(9)  | 18(1)           | 22(1)           | 22(1)           | -1(1)           | 6(1)            | 1(1)            |
| N(10) | 20(1)           | 23(1)           | 22(1)           | 2(1)            | 5(1)            | 3(1)            |
| N(11) | 16(1)           | 21(1)           | 20(1)           | 2(1)            | 3(1)            | 2(1)            |
| N(12) | 21(1)           | 23(1)           | 24(1)           | 0(1)            | 4(1)            | 1(1)            |
| C(1)  | 41(2)           | 21(2)           | 21(1)           | 1(1)            | 5(1)            | -1(1)           |
| C(2)  | 51(2)           | 24(2)           | 20(1)           | 2(1)            | 2(1)            | 4(2)            |
| C(3)  | 67(2)           | 24(2)           | 37(2)           | 10(1)           | -1(2)           | -1(2)           |
| C(4)  | 83(3)           | 26(2)           | 54(2)           | 14(2)           | -5(2)           | 2(2)            |
| C(5)  | 74(3)           | 32(2)           | 50(2)           | 6(2)            | -9(2)           | 19(2)           |
| C(6)  | 54(2)           | 33(2)           | 32(2)           | 1(1)            | -5(2)           | 14(2)           |

|       |       |       |       |       |       |       |
|-------|-------|-------|-------|-------|-------|-------|
| C(7)  | 43(2) | 25(2) | 21(1) | 1(1)  | -1(1) | 8(1)  |
| C(8)  | 31(2) | 24(2) | 21(1) | -4(1) | 3(1)  | 4(1)  |
| C(9)  | 24(1) | 21(2) | 26(2) | -4(1) | 5(1)  | 2(1)  |
| C(10) | 32(2) | 19(2) | 29(2) | -5(1) | 10(1) | -4(1) |
| C(11) | 32(2) | 33(2) | 40(2) | -7(1) | 15(1) | -3(1) |
| C(12) | 37(2) | 38(2) | 48(2) | -7(2) | 25(2) | -7(2) |
| C(13) | 53(2) | 31(2) | 37(2) | -2(1) | 24(2) | -8(2) |
| C(14) | 43(2) | 23(2) | 27(2) | -1(1) | 10(1) | -7(1) |
| C(15) | 31(2) | 17(1) | 28(2) | -5(1) | 10(1) | -5(1) |
| C(16) | 28(2) | 17(1) | 23(1) | -1(1) | 6(1)  | 0(1)  |
| C(17) | 26(1) | 21(1) | 23(1) | 0(1)  | 5(1)  | 3(1)  |
| C(18) | 22(1) | 25(2) | 29(2) | -3(1) | 7(1)  | 2(1)  |
| C(19) | 24(2) | 30(2) | 32(2) | -1(1) | 5(1)  | 4(1)  |
| C(20) | 23(2) | 45(2) | 36(2) | -4(2) | 3(1)  | 4(1)  |
| C(21) | 20(2) | 40(2) | 46(2) | -7(2) | 7(1)  | -6(1) |
| C(22) | 29(2) | 30(2) | 40(2) | -2(1) | 14(1) | -5(1) |
| C(23) | 25(2) | 27(2) | 28(2) | -2(1) | 9(1)  | -1(1) |
| C(24) | 30(2) | 26(2) | 23(1) | 1(1)  | 7(1)  | -3(1) |
| C(25) | 22(1) | 20(1) | 18(1) | 1(1)  | 3(1)  | 2(1)  |
| C(26) | 25(2) | 22(2) | 21(1) | -3(1) | 1(1)  | 4(1)  |
| C(27) | 32(2) | 25(2) | 26(2) | -2(1) | 4(1)  | 3(1)  |
| C(28) | 45(2) | 19(2) | 30(2) | 2(1)  | -3(1) | 10(1) |
| C(29) | 32(2) | 32(2) | 33(2) | -6(1) | -6(1) | 16(1) |
| C(30) | 21(2) | 29(2) | 32(2) | -8(1) | 2(1)  | 5(1)  |
| C(31) | 23(1) | 24(2) | 22(1) | -6(1) | 2(1)  | 4(1)  |
| C(32) | 18(1) | 26(2) | 22(1) | -3(1) | 4(1)  | 4(1)  |
| C(33) | 19(1) | 28(2) | 23(1) | -1(1) | 9(1)  | 0(1)  |
| C(34) | 22(1) | 25(2) | 26(1) | 1(1)  | 8(1)  | -2(1) |
| C(35) | 21(1) | 29(2) | 29(2) | 2(1)  | 8(1)  | 0(1)  |
| C(36) | 21(1) | 31(2) | 29(2) | 3(1)  | 4(1)  | -9(1) |
| C(37) | 32(2) | 21(2) | 26(2) | 4(1)  | 3(1)  | -3(1) |
| C(38) | 25(2) | 22(2) | 28(2) | 4(1)  | 6(1)  | 1(1)  |
| C(39) | 20(1) | 23(2) | 25(1) | 2(1)  | 5(1)  | 1(1)  |
| C(40) | 20(1) | 21(2) | 20(1) | 1(1)  | 3(1)  | 2(1)  |
| C(41) | 18(1) | 22(2) | 19(1) | 3(1)  | 2(1)  | 4(1)  |
| C(42) | 16(1) | 28(2) | 25(1) | 2(1)  | 4(1)  | 3(1)  |



|       |         |         |         |         |         |         |
|-------|---------|---------|---------|---------|---------|---------|
| C(43) | 22(1)   | 30(2)   | 32(2)   | -1(1)   | 5(1)    | 3(1)    |
| C(44) | 22(2)   | 47(2)   | 36(2)   | -4(2)   | 14(1)   | 8(2)    |
| C(45) | 20(1)   | 50(2)   | 33(2)   | 6(2)    | 11(1)   | -1(1)   |
| C(46) | 21(1)   | 33(2)   | 30(2)   | 8(1)    | 6(1)    | 1(1)    |
| C(47) | 17(1)   | 31(2)   | 23(1)   | 4(1)    | 2(1)    | 2(1)    |
| C(48) | 16(1)   | 26(2)   | 24(1)   | 2(1)    | 2(1)    | -1(1)   |
| B(1)  | 25(2)   | 18(2)   | 21(2)   | 0(1)    | 5(1)    | 1(1)    |
| B(2)  | 18(2)   | 23(2)   | 22(2)   | 2(1)    | 5(1)    | 2(1)    |
| C(1S) | 167(10) | 283(15) | 299(18) | -41(12) | 45(10)  | -93(11) |
| C(2S) | 520(40) | 243(14) | 630(40) | -30(19) | 390(30) | 60(20)  |
| C(3S) | 300(14) | 234(9)  | 110(7)  | 13(7)   | 45(7)   | 189(9)  |
| C(4S) | 134(8)  | 260(10) | 253(14) | -41(10) | 1(8)    | 88(8)   |
| C(5S) | 177(9)  | 261(9)  | 130(7)  | -56(8)  | 50(6)   | 85(9)   |
| C(6S) | 89(5)   | 374(13) | 158(9)  | -92(10) | 7(5)    | 35(9)   |
| C(7S) | 128(7)  | 356(12) | 88(5)   | -55(8)  | 52(5)   | -25(10) |

---

**Table S10.** Hydrogen coordinates ( $\times 10^4$ ) and isotropic displacement parameters ( $\text{\AA}^2 \times 10^3$ ) for F<sub>12</sub>BsubPc-O-BsubPc.

|        | x     | y    | z    | U(eq) |
|--------|-------|------|------|-------|
| H(3A)  | 7243  | 6853 | 2096 | 53    |
| H(4A)  | 5593  | 7568 | 1828 | 68    |
| H(5A)  | 3714  | 7159 | 1891 | 64    |
| H(6A)  | 3418  | 6017 | 2249 | 49    |
| H(11A) | 2874  | 3995 | 3711 | 41    |
| H(12A) | 2661  | 3321 | 4557 | 47    |
| H(13A) | 4265  | 2786 | 5131 | 46    |
| H(14A) | 6163  | 2935 | 4911 | 37    |
| H(19A) | 10315 | 3965 | 4815 | 34    |
| H(20A) | 11911 | 4737 | 4995 | 42    |
| H(21A) | 12154 | 5642 | 4323 | 43    |
| H(22A) | 10796 | 5804 | 3447 | 38    |
| H(1SA) | -1219 | 1048 | 3511 | 373   |
| H(1SB) | -1376 | 1882 | 3593 | 373   |
| H(1SC) | -367  | 1464 | 4026 | 373   |
| H(2SA) | -171  | 1367 | 2799 | 518   |
| H(2SB) | 865   | 1532 | 3358 | 518   |
| H(3SA) | -1042 | 2512 | 2969 | 256   |
| H(3SB) | 57    | 2677 | 3482 | 256   |
| H(4SA) | 90    | 2563 | 2224 | 263   |
| H(4SB) | 1283  | 2522 | 2694 | 263   |
| H(5SA) | -215  | 3721 | 2463 | 224   |
| H(5SB) | 795   | 3691 | 3039 | 224   |
| H(6SA) | 1283  | 3593 | 1834 | 250   |
| H(6SB) | 2255  | 3659 | 2430 | 250   |
| H(7SA) | 1803  | 4792 | 1970 | 281   |
| H(7SB) | 1515  | 4773 | 2642 | 281   |
| H(7SC) | 474   | 4702 | 2083 | 281   |

**Table S11.** Torsion angles [°] for F<sub>12</sub>BsubPc-O-BsubPc.

---

|                      |           |
|----------------------|-----------|
| C(24)-N(6)-C(1)-N(1) | -8.4(4)   |
| C(24)-N(6)-C(1)-C(2) | 154.6(3)  |
| C(8)-N(1)-C(1)-N(6)  | 155.4(3)  |
| B(1)-N(1)-C(1)-N(6)  | -15.1(4)  |
| C(8)-N(1)-C(1)-C(2)  | -11.2(3)  |
| B(1)-N(1)-C(1)-C(2)  | 178.3(2)  |
| N(6)-C(1)-C(2)-C(3)  | 17.0(5)   |
| N(1)-C(1)-C(2)-C(3)  | -177.9(3) |
| N(6)-C(1)-C(2)-C(7)  | -158.8(3) |
| N(1)-C(1)-C(2)-C(7)  | 6.3(3)    |
| C(7)-C(2)-C(3)-C(4)  | -1.0(5)   |
| C(1)-C(2)-C(3)-C(4)  | -176.3(3) |
| C(2)-C(3)-C(4)-C(5)  | 0.7(6)    |
| C(3)-C(4)-C(5)-C(6)  | 0.7(6)    |
| C(4)-C(5)-C(6)-C(7)  | -1.8(5)   |
| C(5)-C(6)-C(7)-C(2)  | 1.5(5)    |
| C(5)-C(6)-C(7)-C(8)  | 176.4(3)  |
| C(3)-C(2)-C(7)-C(6)  | -0.1(5)   |
| C(1)-C(2)-C(7)-C(6)  | 176.2(3)  |
| C(3)-C(2)-C(7)-C(8)  | -176.1(3) |
| C(1)-C(2)-C(7)-C(8)  | 0.2(3)    |
| C(9)-N(2)-C(8)-N(1)  | 8.5(4)    |
| C(9)-N(2)-C(8)-C(7)  | -156.0(3) |
| C(1)-N(1)-C(8)-N(2)  | -156.4(3) |
| B(1)-N(1)-C(8)-N(2)  | 14.0(4)   |
| C(1)-N(1)-C(8)-C(7)  | 11.4(3)   |
| B(1)-N(1)-C(8)-C(7)  | -178.2(2) |
| C(6)-C(7)-C(8)-N(2)  | -15.6(5)  |
| C(2)-C(7)-C(8)-N(2)  | 159.8(3)  |
| C(6)-C(7)-C(8)-N(1)  | 177.9(3)  |
| C(2)-C(7)-C(8)-N(1)  | -6.6(3)   |
| C(8)-N(2)-C(9)-N(3)  | -8.1(4)   |
| C(8)-N(2)-C(9)-C(10) | 156.5(3)  |
| C(16)-N(3)-C(9)-N(2) | 155.6(3)  |

|                         |           |
|-------------------------|-----------|
| B(1)-N(3)-C(9)-N(2)     | -14.8(4)  |
| C(16)-N(3)-C(9)-C(10)   | -12.2(3)  |
| B(1)-N(3)-C(9)-C(10)    | 177.4(2)  |
| N(2)-C(9)-C(10)-C(11)   | 17.8(5)   |
| N(3)-C(9)-C(10)-C(11)   | -175.5(3) |
| N(2)-C(9)-C(10)-C(15)   | -160.0(3) |
| N(3)-C(9)-C(10)-C(15)   | 6.6(3)    |
| C(15)-C(10)-C(11)-C(12) | -4.5(4)   |
| C(9)-C(10)-C(11)-C(12)  | 177.9(3)  |
| C(10)-C(11)-C(12)-C(13) | 2.8(5)    |
| C(11)-C(12)-C(13)-C(14) | 1.4(5)    |
| C(12)-C(13)-C(14)-C(15) | -3.9(5)   |
| C(13)-C(14)-C(15)-C(10) | 2.2(4)    |
| C(13)-C(14)-C(15)-C(16) | -178.4(3) |
| C(11)-C(10)-C(15)-C(14) | 2.0(4)    |
| C(9)-C(10)-C(15)-C(14)  | -179.9(3) |
| C(11)-C(10)-C(15)-C(16) | -177.5(3) |
| C(9)-C(10)-C(15)-C(16)  | 0.6(3)    |
| C(17)-N(4)-C(16)-N(3)   | 7.7(4)    |
| C(17)-N(4)-C(16)-C(15)  | -156.3(3) |
| C(9)-N(3)-C(16)-N(4)    | -154.7(3) |
| B(1)-N(3)-C(16)-N(4)    | 15.8(4)   |
| C(9)-N(3)-C(16)-C(15)   | 12.7(3)   |
| B(1)-N(3)-C(16)-C(15)   | -176.9(2) |
| C(14)-C(15)-C(16)-N(4)  | -21.1(5)  |
| C(10)-C(15)-C(16)-N(4)  | 158.3(3)  |
| C(14)-C(15)-C(16)-N(3)  | 172.9(3)  |
| C(10)-C(15)-C(16)-N(3)  | -7.6(3)   |
| C(16)-N(4)-C(17)-N(5)   | -9.2(4)   |
| C(16)-N(4)-C(17)-C(18)  | 155.0(3)  |
| C(24)-N(5)-C(17)-N(4)   | 156.2(3)  |
| B(1)-N(5)-C(17)-N(4)    | -12.7(4)  |
| C(24)-N(5)-C(17)-C(18)  | -11.4(3)  |
| B(1)-N(5)-C(17)-C(18)   | 179.8(2)  |
| N(4)-C(17)-C(18)-C(19)  | 13.9(5)   |
| N(5)-C(17)-C(18)-C(19)  | -179.9(3) |

|                         |           |
|-------------------------|-----------|
| N(4)-C(17)-C(18)-C(23)  | -159.6(3) |
| N(5)-C(17)-C(18)-C(23)  | 6.5(3)    |
| C(23)-C(18)-C(19)-C(20) | -0.4(4)   |
| C(17)-C(18)-C(19)-C(20) | -173.3(3) |
| C(18)-C(19)-C(20)-C(21) | 0.8(5)    |
| C(19)-C(20)-C(21)-C(22) | 0.0(5)    |
| C(20)-C(21)-C(22)-C(23) | -1.2(5)   |
| C(21)-C(22)-C(23)-C(18) | 1.6(4)    |
| C(21)-C(22)-C(23)-C(24) | 173.5(3)  |
| C(19)-C(18)-C(23)-C(22) | -0.8(4)   |
| C(17)-C(18)-C(23)-C(22) | 173.7(3)  |
| C(19)-C(18)-C(23)-C(24) | -174.5(3) |
| C(17)-C(18)-C(23)-C(24) | 0.0(3)    |
| C(1)-N(6)-C(24)-N(5)    | 9.1(4)    |
| C(1)-N(6)-C(24)-C(23)   | -153.9(3) |
| C(17)-N(5)-C(24)-N(6)   | -155.1(3) |
| B(1)-N(5)-C(24)-N(6)    | 13.8(4)   |
| C(17)-N(5)-C(24)-C(23)  | 11.3(3)   |
| B(1)-N(5)-C(24)-C(23)   | -179.7(2) |
| C(22)-C(23)-C(24)-N(6)  | -14.1(5)  |
| C(18)-C(23)-C(24)-N(6)  | 158.7(3)  |
| C(22)-C(23)-C(24)-N(5)  | -179.3(3) |
| C(18)-C(23)-C(24)-N(5)  | -6.5(3)   |
| C(48)-N(12)-C(25)-N(7)  | 9.7(4)    |
| C(48)-N(12)-C(25)-C(26) | -154.3(3) |
| C(32)-N(7)-C(25)-N(12)  | -158.0(2) |
| B(2)-N(7)-C(25)-N(12)   | 12.9(4)   |
| C(32)-N(7)-C(25)-C(26)  | 9.3(3)    |
| B(2)-N(7)-C(25)-C(26)   | -179.8(2) |
| N(12)-C(25)-C(26)-C(27) | -11.9(5)  |
| N(7)-C(25)-C(26)-C(27)  | -178.0(3) |
| N(12)-C(25)-C(26)-C(31) | 161.7(3)  |
| N(7)-C(25)-C(26)-C(31)  | -4.4(3)   |
| C(31)-C(26)-C(27)-F(1)  | -177.9(2) |
| C(25)-C(26)-C(27)-F(1)  | -5.0(5)   |
| C(31)-C(26)-C(27)-C(28) | 1.3(4)    |

|                         |           |
|-------------------------|-----------|
| C(25)-C(26)-C(27)-C(28) | 174.2(3)  |
| F(1)-C(27)-C(28)-F(2)   | 1.7(4)    |
| C(26)-C(27)-C(28)-F(2)  | -177.5(3) |
| F(1)-C(27)-C(28)-C(29)  | -179.4(3) |
| C(26)-C(27)-C(28)-C(29) | 1.4(4)    |
| F(2)-C(28)-C(29)-F(3)   | -4.3(4)   |
| C(27)-C(28)-C(29)-F(3)  | 176.8(3)  |
| F(2)-C(28)-C(29)-C(30)  | 175.8(3)  |
| C(27)-C(28)-C(29)-C(30) | -3.2(5)   |
| F(3)-C(29)-C(30)-F(4)   | 1.2(4)    |
| C(28)-C(29)-C(30)-F(4)  | -178.8(3) |
| F(3)-C(29)-C(30)-C(31)  | -177.8(3) |
| C(28)-C(29)-C(30)-C(31) | 2.1(4)    |
| F(4)-C(30)-C(31)-C(26)  | -178.5(2) |
| C(29)-C(30)-C(31)-C(26) | 0.5(4)    |
| F(4)-C(30)-C(31)-C(32)  | 7.6(5)    |
| C(29)-C(30)-C(31)-C(32) | -173.4(3) |
| C(27)-C(26)-C(31)-C(30) | -2.3(4)   |
| C(25)-C(26)-C(31)-C(30) | -176.8(2) |
| C(27)-C(26)-C(31)-C(32) | 173.1(2)  |
| C(25)-C(26)-C(31)-C(32) | -1.5(3)   |
| C(33)-N(8)-C(32)-N(7)   | -9.5(4)   |
| C(33)-N(8)-C(32)-C(31)  | 153.9(3)  |
| C(25)-N(7)-C(32)-N(8)   | 156.7(2)  |
| B(2)-N(7)-C(32)-N(8)    | -14.1(4)  |
| C(25)-N(7)-C(32)-C(31)  | -10.2(3)  |
| B(2)-N(7)-C(32)-C(31)   | 178.9(2)  |
| C(30)-C(31)-C(32)-N(8)  | 15.8(5)   |
| C(26)-C(31)-C(32)-N(8)  | -158.7(3) |
| C(30)-C(31)-C(32)-N(7)  | -178.6(3) |
| C(26)-C(31)-C(32)-N(7)  | 6.8(3)    |
| C(32)-N(8)-C(33)-N(9)   | 7.8(4)    |
| C(32)-N(8)-C(33)-C(34)  | -151.7(3) |
| C(40)-N(9)-C(33)-N(8)   | -151.6(3) |
| B(2)-N(9)-C(33)-N(8)    | 17.2(4)   |
| C(40)-N(9)-C(33)-C(34)  | 12.1(3)   |

|                         |           |
|-------------------------|-----------|
| B(2)-N(9)-C(33)-C(34)   | -179.0(2) |
| N(8)-C(33)-C(34)-C(35)  | -18.5(5)  |
| N(9)-C(33)-C(34)-C(35)  | 179.1(3)  |
| N(8)-C(33)-C(34)-C(39)  | 154.7(3)  |
| N(9)-C(33)-C(34)-C(39)  | -7.6(3)   |
| C(39)-C(34)-C(35)-F(5)  | 177.7(3)  |
| C(33)-C(34)-C(35)-F(5)  | -9.8(5)   |
| C(39)-C(34)-C(35)-C(36) | -1.4(4)   |
| C(33)-C(34)-C(35)-C(36) | 171.1(3)  |
| F(5)-C(35)-C(36)-F(6)   | 1.9(4)    |
| C(34)-C(35)-C(36)-F(6)  | -179.0(3) |
| F(5)-C(35)-C(36)-C(37)  | -178.9(3) |
| C(34)-C(35)-C(36)-C(37) | 0.3(4)    |
| F(6)-C(36)-C(37)-F(7)   | 0.4(4)    |
| C(35)-C(36)-C(37)-F(7)  | -178.8(3) |
| F(6)-C(36)-C(37)-C(38)  | -179.9(3) |
| C(35)-C(36)-C(37)-C(38) | 0.9(4)    |
| F(7)-C(37)-C(38)-F(8)   | 0.0(4)    |
| C(36)-C(37)-C(38)-F(8)  | -179.7(3) |
| F(7)-C(37)-C(38)-C(39)  | 178.9(2)  |
| C(36)-C(37)-C(38)-C(39) | -0.8(4)   |
| F(8)-C(38)-C(39)-C(34)  | 178.5(2)  |
| C(37)-C(38)-C(39)-C(34) | -0.4(4)   |
| F(8)-C(38)-C(39)-C(40)  | 6.6(5)    |
| C(37)-C(38)-C(39)-C(40) | -172.3(3) |
| C(35)-C(34)-C(39)-C(38) | 1.5(4)    |
| C(33)-C(34)-C(39)-C(38) | -172.7(2) |
| C(35)-C(34)-C(39)-C(40) | 175.3(3)  |
| C(33)-C(34)-C(39)-C(40) | 1.1(3)    |
| C(41)-N(10)-C(40)-N(9)  | -7.7(4)   |
| C(41)-N(10)-C(40)-C(39) | 155.8(3)  |
| C(33)-N(9)-C(40)-N(10)  | 155.4(2)  |
| B(2)-N(9)-C(40)-N(10)   | -13.1(4)  |
| C(33)-N(9)-C(40)-C(39)  | -11.5(3)  |
| B(2)-N(9)-C(40)-C(39)   | 180.0(2)  |
| C(38)-C(39)-C(40)-N(10) | 12.8(5)   |

|                         |           |
|-------------------------|-----------|
| C(34)-C(39)-C(40)-N(10) | -159.9(3) |
| C(38)-C(39)-C(40)-N(9)  | 178.5(3)  |
| C(34)-C(39)-C(40)-N(9)  | 5.9(3)    |
| C(40)-N(10)-C(41)-N(11) | 6.6(4)    |
| C(40)-N(10)-C(41)-C(42) | -158.4(3) |
| C(48)-N(11)-C(41)-N(10) | -156.2(2) |
| B(2)-N(11)-C(41)-N(10)  | 15.3(4)   |
| C(48)-N(11)-C(41)-C(42) | 12.1(3)   |
| B(2)-N(11)-C(41)-C(42)  | -176.4(2) |
| N(10)-C(41)-C(42)-C(43) | -13.6(5)  |
| N(11)-C(41)-C(42)-C(43) | 179.5(3)  |
| N(10)-C(41)-C(42)-C(47) | 161.6(3)  |
| N(11)-C(41)-C(42)-C(47) | -5.4(3)   |
| C(47)-C(42)-C(43)-F(9)  | -179.3(3) |
| C(41)-C(42)-C(43)-F(9)  | -4.7(5)   |
| C(47)-C(42)-C(43)-C(44) | 2.2(4)    |
| C(41)-C(42)-C(43)-C(44) | 176.8(3)  |
| F(9)-C(43)-C(44)-F(10)  | -0.8(5)   |
| C(42)-C(43)-C(44)-F(10) | 177.7(3)  |
| F(9)-C(43)-C(44)-C(45)  | -179.0(3) |
| C(42)-C(43)-C(44)-C(45) | -0.5(5)   |
| F(10)-C(44)-C(45)-F(11) | 0.7(5)    |
| C(43)-C(44)-C(45)-F(11) | 178.9(3)  |
| F(10)-C(44)-C(45)-C(46) | -179.5(3) |
| C(43)-C(44)-C(45)-C(46) | -1.3(5)   |
| F(11)-C(45)-C(46)-F(12) | 0.8(5)    |
| C(44)-C(45)-C(46)-F(12) | -179.0(3) |
| F(11)-C(45)-C(46)-C(47) | -179.0(3) |
| C(44)-C(45)-C(46)-C(47) | 1.2(5)    |
| F(12)-C(46)-C(47)-C(42) | -179.2(2) |
| C(45)-C(46)-C(47)-C(42) | 0.6(4)    |
| F(12)-C(46)-C(47)-C(48) | 6.1(5)    |
| C(45)-C(46)-C(47)-C(48) | -174.1(3) |
| C(43)-C(42)-C(47)-C(46) | -2.3(4)   |
| C(41)-C(42)-C(47)-C(46) | -178.2(3) |
| C(43)-C(42)-C(47)-C(48) | 173.6(3)  |



|                         |           |
|-------------------------|-----------|
| C(41)-C(42)-C(47)-C(48) | -2.4(3)   |
| C(25)-N(12)-C(48)-N(11) | -6.2(4)   |
| C(25)-N(12)-C(48)-C(47) | 155.4(3)  |
| C(41)-N(11)-C(48)-N(12) | 151.7(3)  |
| B(2)-N(11)-C(48)-N(12)  | -20.0(4)  |
| C(41)-N(11)-C(48)-C(47) | -13.6(3)  |
| B(2)-N(11)-C(48)-C(47)  | 174.7(2)  |
| C(46)-C(47)-C(48)-N(12) | 20.4(5)   |
| C(42)-C(47)-C(48)-N(12) | -154.8(3) |
| C(46)-C(47)-C(48)-N(11) | -175.5(3) |
| C(42)-C(47)-C(48)-N(11) | 9.3(3)    |
| B(2)-O(1)-B(1)-N(5)     | -133.5(3) |
| B(2)-O(1)-B(1)-N(3)     | 108.1(3)  |
| B(2)-O(1)-B(1)-N(1)     | -12.7(5)  |
| C(24)-N(5)-B(1)-O(1)    | 97.6(3)   |
| C(17)-N(5)-B(1)-O(1)    | -94.6(3)  |
| C(24)-N(5)-B(1)-N(3)    | -137.6(3) |
| C(17)-N(5)-B(1)-N(3)    | 30.2(3)   |
| C(24)-N(5)-B(1)-N(1)    | -31.2(3)  |
| C(17)-N(5)-B(1)-N(1)    | 136.6(3)  |
| C(16)-N(3)-B(1)-O(1)    | 92.8(3)   |
| C(9)-N(3)-B(1)-O(1)     | -97.7(3)  |
| C(16)-N(3)-B(1)-N(5)    | -31.7(3)  |
| C(9)-N(3)-B(1)-N(5)     | 137.8(2)  |
| C(16)-N(3)-B(1)-N(1)    | -138.3(3) |
| C(9)-N(3)-B(1)-N(1)     | 31.1(3)   |
| C(1)-N(1)-B(1)-O(1)     | -94.4(3)  |
| C(8)-N(1)-B(1)-O(1)     | 96.0(3)   |
| C(1)-N(1)-B(1)-N(5)     | 31.9(3)   |
| C(8)-N(1)-B(1)-N(5)     | -137.6(2) |
| C(1)-N(1)-B(1)-N(3)     | 138.8(2)  |
| C(8)-N(1)-B(1)-N(3)     | -30.8(3)  |
| B(1)-O(1)-B(2)-N(7)     | 3.5(5)    |
| B(1)-O(1)-B(2)-N(9)     | -118.2(3) |
| B(1)-O(1)-B(2)-N(11)    | 123.6(3)  |
| C(32)-N(7)-B(2)-O(1)    | -95.6(3)  |

|                         |            |
|-------------------------|------------|
| C(25)-N(7)-B(2)-O(1)    | 94.5(3)    |
| C(32)-N(7)-B(2)-N(9)    | 32.8(3)    |
| C(25)-N(7)-B(2)-N(9)    | -137.2(2)  |
| C(32)-N(7)-B(2)-N(11)   | 137.7(2)   |
| C(25)-N(7)-B(2)-N(11)   | -32.2(3)   |
| C(40)-N(9)-B(2)-O(1)    | -96.6(3)   |
| C(33)-N(9)-B(2)-O(1)    | 95.8(3)    |
| C(40)-N(9)-B(2)-N(7)    | 133.7(2)   |
| C(33)-N(9)-B(2)-N(7)    | -34.0(3)   |
| C(40)-N(9)-B(2)-N(11)   | 28.7(3)    |
| C(33)-N(9)-B(2)-N(11)   | -138.9(2)  |
| C(41)-N(11)-B(2)-O(1)   | 96.0(3)    |
| C(48)-N(11)-B(2)-O(1)   | -93.2(3)   |
| C(41)-N(11)-B(2)-N(7)   | -135.2(2)  |
| C(48)-N(11)-B(2)-N(7)   | 35.6(3)    |
| C(41)-N(11)-B(2)-N(9)   | -29.9(3)   |
| C(48)-N(11)-B(2)-N(9)   | 140.9(2)   |
| C(1S)-C(2S)-C(3S)-C(4S) | -175.2(14) |
| C(2S)-C(3S)-C(4S)-C(5S) | -165.0(15) |
| C(3S)-C(4S)-C(5S)-C(6S) | 167.6(10)  |
| C(4S)-C(5S)-C(6S)-C(7S) | 173.1(10)  |

---

Symmetry transformations used to generate equivalent atoms:

### Crystal Structure Details of Cl<sub>6</sub>BsubPc-O-BsubPc

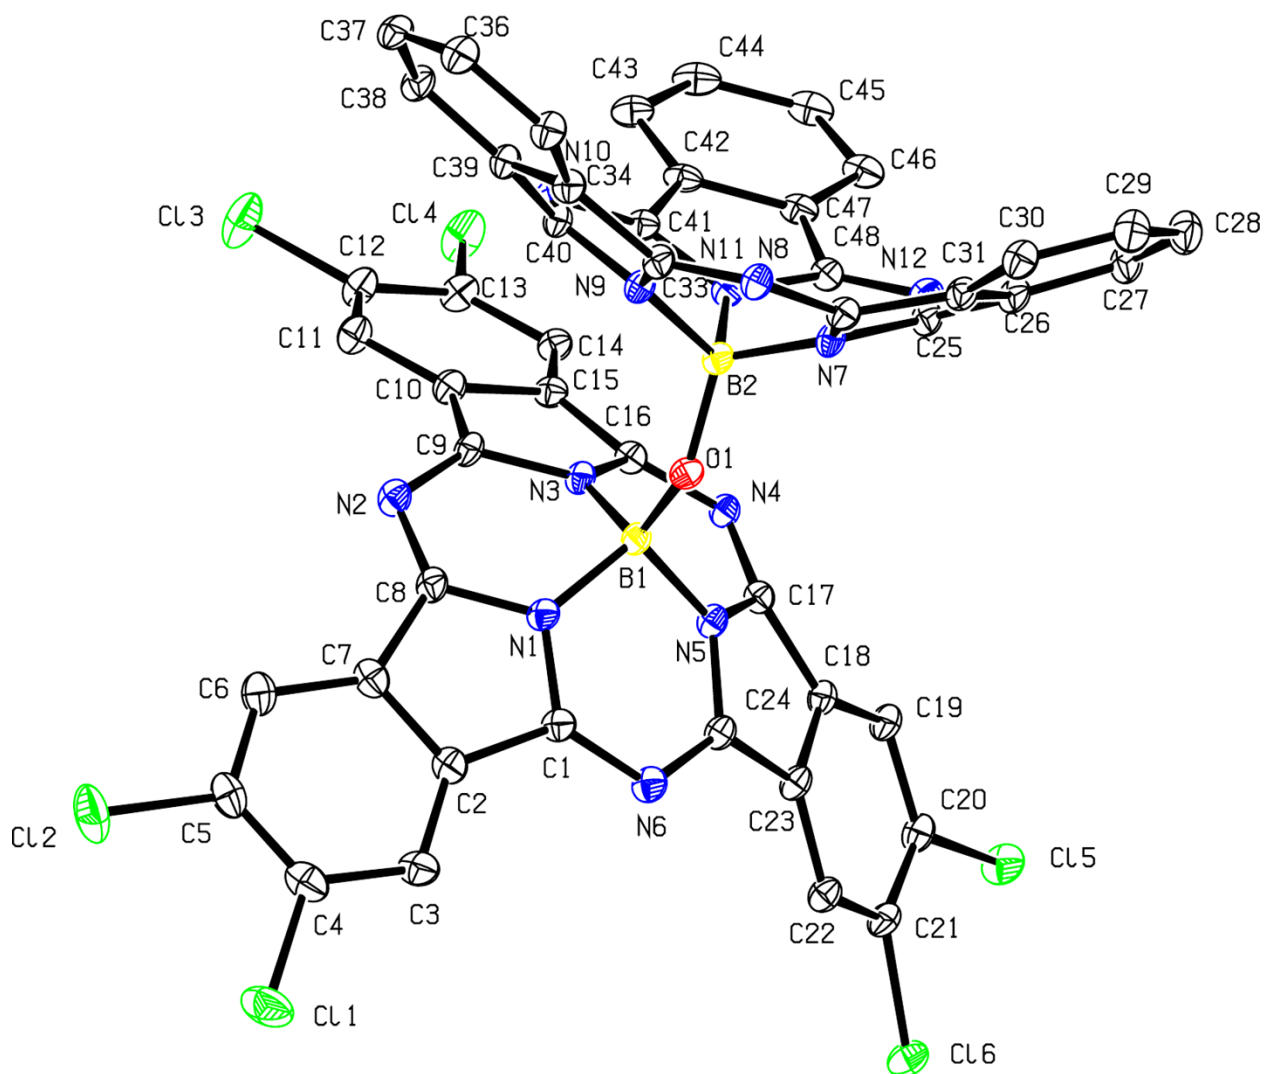

**Figure S14.** Ellipsoid plot (50 % probability) showing the structure and atom numbering scheme of Cl<sub>6</sub>BsubPc-O-BsubPc (CCDC deposition number: 1018458). Hydrogen atoms have been omitted for clarity. Colors: boron - yellow; nitrogen - blue; carbon - white; oxygen - red; chlorine - green.

**Table S12.** Crystal data and structure refinement for Cl<sub>6</sub>BsubPc-O-BsubPc.

|                                   |                                                                                                            |
|-----------------------------------|------------------------------------------------------------------------------------------------------------|
| Empirical formula                 | C <sub>48</sub> H <sub>18</sub> B <sub>2</sub> Cl <sub>6</sub> N <sub>12</sub> O                           |
| Formula weight                    | 1013.06                                                                                                    |
| Temperature                       | 147(2) K                                                                                                   |
| Wavelength                        | 1.54178 Å                                                                                                  |
| Crystal system                    | Monoclinic                                                                                                 |
| Space group                       | P 2 <sub>1</sub> /n                                                                                        |
| Unit cell dimensions              | a = 19.7916(7) Å      a = 90°.<br>b = 11.6134(3) Å      b = 117.050(2)°.<br>c = 20.9120(7) Å      g = 90°. |
| Volume                            | 4280.8(2) Å <sup>3</sup>                                                                                   |
| Z                                 | 4                                                                                                          |
| Density (calculated)              | 1.572 Mg/m <sup>3</sup>                                                                                    |
| Absorption coefficient            | 4.133 mm <sup>-1</sup>                                                                                     |
| F(000)                            | 2040                                                                                                       |
| Crystal size                      | 0.330 x 0.100 x 0.020 mm <sup>3</sup>                                                                      |
| Theta range for data collection   | 2.550 to 66.822°.                                                                                          |
| Index ranges                      | -23 ≤ h ≤ 23, -13 ≤ k ≤ 13, -24 ≤ l ≤ 24                                                                   |
| Reflections collected             | 61032                                                                                                      |
| Independent reflections           | 7540 [R(int) = 0.1163]                                                                                     |
| Completeness to theta = 67.679°   | 97.4 %                                                                                                     |
| Absorption correction             | Semi-empirical from equivalents                                                                            |
| Max. and min. transmission        | 0.7529 and 0.5170                                                                                          |
| Refinement method                 | Full-matrix least-squares on F <sup>2</sup>                                                                |
| Data / restraints / parameters    | 7540 / 0 / 622                                                                                             |
| Goodness-of-fit on F <sup>2</sup> | 1.043                                                                                                      |
| Final R indices [I > 2σ(I)]       | R1 = 0.0549, wR2 = 0.1200                                                                                  |
| R indices (all data)              | R1 = 0.0783, wR2 = 0.1319                                                                                  |
| Extinction coefficient            | n/a                                                                                                        |
| Largest diff. peak and hole       | 0.288 and -0.479 e.Å <sup>-3</sup>                                                                         |

**Table S13.** Atomic coordinates ( $\times 10^4$ ) and equivalent isotropic displacement parameters ( $\text{\AA}^2 \times 10^3$ ) for Cl<sub>6</sub>BsubPc-O-BsubPc. U(eq) is defined as one third of the trace of the orthogonalized U<sup>ij</sup> tensor.

|       | x       | y        | z        | U(eq) |
|-------|---------|----------|----------|-------|
| Cl(1) | 3551(1) | 8329(1)  | 10629(1) | 60(1) |
| Cl(2) | 4882(1) | 6744(1)  | 10755(1) | 60(1) |
| Cl(3) | 8340(1) | 9595(1)  | 8645(1)  | 52(1) |
| Cl(4) | 8034(1) | 12024(1) | 7884(1)  | 47(1) |
| Cl(5) | 3771(1) | 16893(1) | 7605(1)  | 38(1) |
| Cl(6) | 3051(1) | 16025(1) | 8586(1)  | 35(1) |
| O(1)  | 3608(1) | 9728(2)  | 6772(1)  | 24(1) |
| N(1)  | 4134(2) | 9795(2)  | 8083(2)  | 24(1) |
| N(2)  | 5334(2) | 8911(2)  | 8430(2)  | 28(1) |
| N(3)  | 4906(2) | 10441(2) | 7579(2)  | 23(1) |
| N(4)  | 4833(2) | 12395(2) | 7231(2)  | 25(1) |
| N(5)  | 3867(2) | 11559(2) | 7464(2)  | 23(1) |
| N(6)  | 3331(2) | 11153(2) | 8256(2)  | 29(1) |
| N(7)  | 2961(2) | 9545(2)  | 5457(2)  | 24(1) |
| N(8)  | 2575(2) | 7577(2)  | 5302(2)  | 26(1) |
| N(9)  | 3832(2) | 8095(2)  | 6131(2)  | 23(1) |
| N(10) | 5143(2) | 8349(2)  | 6436(2)  | 25(1) |
| N(11) | 4275(2) | 9919(2)  | 6010(2)  | 23(1) |
| N(12) | 3442(2) | 11171(2) | 5094(2)  | 27(1) |
| C(1)  | 3706(2) | 10147(3) | 8404(2)  | 26(1) |
| C(2)  | 3909(2) | 9391(3)  | 9020(2)  | 29(1) |
| C(3)  | 3620(3) | 9316(3)  | 9507(2)  | 35(1) |
| C(4)  | 3931(3) | 8489(3)  | 10043(2) | 38(1) |
| C(5)  | 4532(3) | 7792(4)  | 10099(2) | 38(1) |
| C(6)  | 4847(2) | 7907(3)  | 9631(2)  | 36(1) |
| C(7)  | 4521(2) | 8704(3)  | 9077(2)  | 30(1) |
| C(8)  | 4701(2) | 9050(3)  | 8501(2)  | 26(1) |
| C(9)  | 5448(2) | 9665(3)  | 7997(2)  | 25(1) |
| C(10) | 6145(2) | 10042(3) | 8002(2)  | 28(1) |
| C(11) | 6865(2) | 9570(3)  | 8312(2)  | 31(1) |
| C(12) | 7444(2) | 10186(3) | 8266(2)  | 33(1) |

|       |         |          |         |       |
|-------|---------|----------|---------|-------|
| C(13) | 7304(2) | 11267(3) | 7917(2) | 31(1) |
| C(14) | 6582(2) | 11737(3) | 7605(2) | 26(1) |
| C(15) | 5995(2) | 11122(3) | 7640(2) | 24(1) |
| C(16) | 5207(2) | 11397(3) | 7418(2) | 23(1) |
| C(17) | 4196(2) | 12485(3) | 7307(2) | 22(1) |
| C(18) | 3856(2) | 13502(3) | 7454(2) | 25(1) |
| C(19) | 3972(2) | 14668(3) | 7398(2) | 27(1) |
| C(20) | 3669(2) | 15436(3) | 7705(2) | 29(1) |
| C(21) | 3291(2) | 15061(3) | 8096(2) | 28(1) |
| C(22) | 3143(2) | 13896(3) | 8125(2) | 28(1) |
| C(23) | 3414(2) | 13116(3) | 7790(2) | 25(1) |
| C(24) | 3470(2) | 11874(3) | 7825(2) | 25(1) |
| C(25) | 2870(2) | 10459(3) | 5010(2) | 26(1) |
| C(26) | 2152(2) | 10271(3) | 4373(2) | 28(1) |
| C(27) | 1786(2) | 10875(3) | 3729(2) | 32(1) |
| C(28) | 1148(2) | 10393(3) | 3179(2) | 39(1) |
| C(29) | 885(2)  | 9304(3)  | 3259(2) | 37(1) |
| C(30) | 1252(2) | 8681(3)  | 3884(2) | 31(1) |
| C(31) | 1881(2) | 9173(3)  | 4448(2) | 27(1) |
| C(32) | 2439(2) | 8699(3)  | 5118(2) | 25(1) |
| C(33) | 3284(2) | 7294(3)  | 5770(2) | 24(1) |
| C(34) | 3674(2) | 6206(3)  | 5844(2) | 26(1) |
| C(35) | 3408(2) | 5115(3)  | 5564(2) | 29(1) |
| C(36) | 3939(2) | 4263(3)  | 5681(2) | 32(1) |
| C(37) | 4716(2) | 4486(3)  | 6049(2) | 31(1) |
| C(38) | 4989(2) | 5576(3)  | 6303(2) | 29(1) |
| C(39) | 4462(2) | 6443(3)  | 6204(2) | 24(1) |
| C(40) | 4547(2) | 7679(3)  | 6335(2) | 23(1) |
| C(41) | 4978(2) | 9448(3)  | 6220(2) | 24(1) |
| C(42) | 5396(2) | 10264(3) | 6004(2) | 26(1) |
| C(43) | 6137(2) | 10279(3) | 6108(2) | 30(1) |
| C(44) | 6363(2) | 11200(3) | 5820(2) | 35(1) |
| C(45) | 5843(2) | 12043(3) | 5408(2) | 35(1) |
| C(46) | 5093(2) | 12015(3) | 5275(2) | 32(1) |
| C(47) | 4867(2) | 11136(3) | 5589(2) | 27(1) |
| C(48) | 4140(2) | 10843(3) | 5558(2) | 25(1) |

|      |         |          |         |       |
|------|---------|----------|---------|-------|
| B(1) | 4087(2) | 10327(3) | 7405(2) | 24(1) |
| B(2) | 3668(2) | 9362(3)  | 6153(2) | 23(1) |

---

**Table S14.** Bond lengths [ $\text{\AA}$ ] and angles [ $^\circ$ ] for Cl<sub>6</sub>BsubPc-O-BsubPc.

---

|             |          |
|-------------|----------|
| Cl(1)-C(4)  | 1.717(4) |
| Cl(2)-C(5)  | 1.726(4) |
| Cl(3)-C(12) | 1.722(4) |
| Cl(4)-C(13) | 1.720(4) |
| Cl(5)-C(20) | 1.727(4) |
| Cl(6)-C(21) | 1.724(4) |
| O(1)-B(1)   | 1.412(5) |
| O(1)-B(2)   | 1.417(5) |
| N(1)-C(1)   | 1.362(4) |
| N(1)-C(8)   | 1.372(5) |
| N(1)-B(1)   | 1.511(5) |
| N(2)-C(8)   | 1.336(5) |
| N(2)-C(9)   | 1.351(5) |
| N(3)-C(9)   | 1.370(4) |
| N(3)-C(16)  | 1.373(4) |
| N(3)-B(1)   | 1.495(5) |
| N(4)-C(16)  | 1.335(4) |
| N(4)-C(17)  | 1.344(5) |
| N(5)-C(24)  | 1.364(5) |
| N(5)-C(17)  | 1.373(4) |
| N(5)-B(1)   | 1.517(5) |
| N(6)-C(1)   | 1.342(5) |
| N(6)-C(24)  | 1.346(5) |
| N(7)-C(32)  | 1.366(5) |
| N(7)-C(25)  | 1.371(4) |
| N(7)-B(2)   | 1.507(5) |
| N(8)-C(33)  | 1.336(5) |
| N(8)-C(32)  | 1.351(4) |
| N(9)-C(33)  | 1.367(5) |
| N(9)-C(40)  | 1.367(5) |
| N(9)-B(2)   | 1.512(5) |
| N(10)-C(41) | 1.344(4) |
| N(10)-C(40) | 1.346(5) |
| N(11)-C(41) | 1.368(5) |



|              |          |
|--------------|----------|
| N(11)-C(48)  | 1.374(4) |
| N(11)-B(2)   | 1.509(5) |
| N(12)-C(48)  | 1.333(5) |
| N(12)-C(25)  | 1.346(5) |
| C(1)-C(2)    | 1.456(5) |
| C(2)-C(3)    | 1.378(5) |
| C(2)-C(7)    | 1.411(5) |
| C(3)-C(4)    | 1.390(6) |
| C(3)-H(3A)   | 0.9500   |
| C(4)-C(5)    | 1.399(6) |
| C(5)-C(6)    | 1.385(6) |
| C(6)-C(7)    | 1.392(5) |
| C(6)-H(6A)   | 0.9500   |
| C(7)-C(8)    | 1.458(5) |
| C(9)-C(10)   | 1.442(5) |
| C(10)-C(11)  | 1.383(5) |
| C(10)-C(15)  | 1.425(5) |
| C(11)-C(12)  | 1.391(5) |
| C(11)-H(11A) | 0.9500   |
| C(12)-C(13)  | 1.415(5) |
| C(13)-C(14)  | 1.385(5) |
| C(14)-C(15)  | 1.394(5) |
| C(14)-H(14A) | 0.9500   |
| C(15)-C(16)  | 1.445(5) |
| C(17)-C(18)  | 1.460(5) |
| C(18)-C(19)  | 1.387(5) |
| C(18)-C(23)  | 1.421(5) |
| C(19)-C(20)  | 1.386(5) |
| C(19)-H(19A) | 0.9500   |
| C(20)-C(21)  | 1.405(5) |
| C(21)-C(22)  | 1.391(5) |
| C(22)-C(23)  | 1.394(5) |
| C(22)-H(22A) | 0.9500   |
| C(23)-C(24)  | 1.446(5) |
| C(25)-C(26)  | 1.457(5) |
| C(26)-C(27)  | 1.394(5) |

|                |          |
|----------------|----------|
| C(26)-C(31)    | 1.419(5) |
| C(27)-C(28)    | 1.382(6) |
| C(27)-H(27A)   | 0.9500   |
| C(28)-C(29)    | 1.406(6) |
| C(28)-H(28A)   | 0.9500   |
| C(29)-C(30)    | 1.377(6) |
| C(29)-H(29A)   | 0.9500   |
| C(30)-C(31)    | 1.389(5) |
| C(30)-H(30A)   | 0.9500   |
| C(31)-C(32)    | 1.443(5) |
| C(33)-C(34)    | 1.452(5) |
| C(34)-C(35)    | 1.395(5) |
| C(34)-C(39)    | 1.418(5) |
| C(35)-C(36)    | 1.382(5) |
| C(35)-H(35A)   | 0.9500   |
| C(36)-C(37)    | 1.396(6) |
| C(36)-H(36A)   | 0.9500   |
| C(37)-C(38)    | 1.384(5) |
| C(37)-H(37A)   | 0.9500   |
| C(38)-C(39)    | 1.396(5) |
| C(38)-H(38A)   | 0.9500   |
| C(39)-C(40)    | 1.456(5) |
| C(41)-C(42)    | 1.459(5) |
| C(42)-C(43)    | 1.381(5) |
| C(42)-C(47)    | 1.431(5) |
| C(43)-C(44)    | 1.397(5) |
| C(43)-H(43A)   | 0.9500   |
| C(44)-C(45)    | 1.397(6) |
| C(44)-H(44A)   | 0.9500   |
| C(45)-C(46)    | 1.381(6) |
| C(45)-H(45A)   | 0.9500   |
| C(46)-C(47)    | 1.393(5) |
| C(46)-H(46A)   | 0.9500   |
| C(47)-C(48)    | 1.452(5) |
| <br>           |          |
| B(1)-O(1)-B(2) | 134.7(3) |

|                   |          |
|-------------------|----------|
| C(1)-N(1)-C(8)    | 112.8(3) |
| C(1)-N(1)-B(1)    | 123.7(3) |
| C(8)-N(1)-B(1)    | 122.7(3) |
| C(8)-N(2)-C(9)    | 116.6(3) |
| C(9)-N(3)-C(16)   | 112.7(3) |
| C(9)-N(3)-B(1)    | 123.1(3) |
| C(16)-N(3)-B(1)   | 123.8(3) |
| C(16)-N(4)-C(17)  | 117.3(3) |
| C(24)-N(5)-C(17)  | 112.2(3) |
| C(24)-N(5)-B(1)   | 123.9(3) |
| C(17)-N(5)-B(1)   | 122.3(3) |
| C(1)-N(6)-C(24)   | 115.9(3) |
| C(32)-N(7)-C(25)  | 111.7(3) |
| C(32)-N(7)-B(2)   | 123.4(3) |
| C(25)-N(7)-B(2)   | 123.0(3) |
| C(33)-N(8)-C(32)  | 116.8(3) |
| C(33)-N(9)-C(40)  | 112.4(3) |
| C(33)-N(9)-B(2)   | 123.4(3) |
| C(40)-N(9)-B(2)   | 122.8(3) |
| C(41)-N(10)-C(40) | 115.7(3) |
| C(41)-N(11)-C(48) | 112.6(3) |
| C(41)-N(11)-B(2)  | 123.4(3) |
| C(48)-N(11)-B(2)  | 123.2(3) |
| C(48)-N(12)-C(25) | 116.8(3) |
| N(6)-C(1)-N(1)    | 123.3(3) |
| N(6)-C(1)-C(2)    | 129.1(3) |
| N(1)-C(1)-C(2)    | 105.8(3) |
| C(3)-C(2)-C(7)    | 122.1(4) |
| C(3)-C(2)-C(1)    | 130.7(4) |
| C(7)-C(2)-C(1)    | 107.2(3) |
| C(2)-C(3)-C(4)    | 117.3(4) |
| C(2)-C(3)-H(3A)   | 121.3    |
| C(4)-C(3)-H(3A)   | 121.3    |
| C(3)-C(4)-C(5)    | 121.0(4) |
| C(3)-C(4)-Cl(1)   | 118.3(3) |
| C(5)-C(4)-Cl(1)   | 120.7(3) |

|                    |          |
|--------------------|----------|
| C(6)-C(5)-C(4)     | 121.6(4) |
| C(6)-C(5)-Cl(2)    | 118.9(3) |
| C(4)-C(5)-Cl(2)    | 119.5(3) |
| C(5)-C(6)-C(7)     | 117.7(4) |
| C(5)-C(6)-H(6A)    | 121.1    |
| C(7)-C(6)-H(6A)    | 121.1    |
| C(6)-C(7)-C(2)     | 120.1(4) |
| C(6)-C(7)-C(8)     | 132.5(4) |
| C(2)-C(7)-C(8)     | 107.3(3) |
| N(2)-C(8)-N(1)     | 122.8(3) |
| N(2)-C(8)-C(7)     | 130.7(3) |
| N(1)-C(8)-C(7)     | 105.3(3) |
| N(2)-C(9)-N(3)     | 122.2(3) |
| N(2)-C(9)-C(10)    | 130.0(3) |
| N(3)-C(9)-C(10)    | 106.0(3) |
| C(11)-C(10)-C(15)  | 121.3(3) |
| C(11)-C(10)-C(9)   | 131.4(3) |
| C(15)-C(10)-C(9)   | 107.2(3) |
| C(10)-C(11)-C(12)  | 118.0(4) |
| C(10)-C(11)-H(11A) | 121.0    |
| C(12)-C(11)-H(11A) | 121.0    |
| C(11)-C(12)-C(13)  | 121.3(3) |
| C(11)-C(12)-Cl(3)  | 118.1(3) |
| C(13)-C(12)-Cl(3)  | 120.7(3) |
| C(14)-C(13)-C(12)  | 120.7(3) |
| C(14)-C(13)-Cl(4)  | 119.1(3) |
| C(12)-C(13)-Cl(4)  | 120.3(3) |
| C(13)-C(14)-C(15)  | 118.7(3) |
| C(13)-C(14)-H(14A) | 120.6    |
| C(15)-C(14)-H(14A) | 120.6    |
| C(14)-C(15)-C(10)  | 120.1(3) |
| C(14)-C(15)-C(16)  | 132.3(3) |
| C(10)-C(15)-C(16)  | 107.4(3) |
| N(4)-C(16)-N(3)    | 121.9(3) |
| N(4)-C(16)-C(15)   | 131.3(3) |
| N(3)-C(16)-C(15)   | 105.6(3) |

|                    |          |
|--------------------|----------|
| N(4)-C(17)-N(5)    | 122.7(3) |
| N(4)-C(17)-C(18)   | 129.4(3) |
| N(5)-C(17)-C(18)   | 105.6(3) |
| C(19)-C(18)-C(23)  | 120.9(3) |
| C(19)-C(18)-C(17)  | 131.4(3) |
| C(23)-C(18)-C(17)  | 107.2(3) |
| C(20)-C(19)-C(18)  | 117.7(3) |
| C(20)-C(19)-H(19A) | 121.1    |
| C(18)-C(19)-H(19A) | 121.1    |
| C(19)-C(20)-C(21)  | 121.8(3) |
| C(19)-C(20)-Cl(5)  | 118.4(3) |
| C(21)-C(20)-Cl(5)  | 119.8(3) |
| C(22)-C(21)-C(20)  | 120.4(3) |
| C(22)-C(21)-Cl(6)  | 119.0(3) |
| C(20)-C(21)-Cl(6)  | 120.5(3) |
| C(21)-C(22)-C(23)  | 118.2(3) |
| C(21)-C(22)-H(22A) | 120.9    |
| C(23)-C(22)-H(22A) | 120.9    |
| C(22)-C(23)-C(18)  | 120.5(3) |
| C(22)-C(23)-C(24)  | 131.4(3) |
| C(18)-C(23)-C(24)  | 106.9(3) |
| N(6)-C(24)-N(5)    | 123.2(3) |
| N(6)-C(24)-C(23)   | 128.3(3) |
| N(5)-C(24)-C(23)   | 106.8(3) |
| N(12)-C(25)-N(7)   | 123.0(3) |
| N(12)-C(25)-C(26)  | 128.6(3) |
| N(7)-C(25)-C(26)   | 106.1(3) |
| C(27)-C(26)-C(31)  | 120.1(3) |
| C(27)-C(26)-C(25)  | 132.1(3) |
| C(31)-C(26)-C(25)  | 107.2(3) |
| C(28)-C(27)-C(26)  | 118.5(4) |
| C(28)-C(27)-H(27A) | 120.7    |
| C(26)-C(27)-H(27A) | 120.7    |
| C(27)-C(28)-C(29)  | 120.8(4) |
| C(27)-C(28)-H(28A) | 119.6    |
| C(29)-C(28)-H(28A) | 119.6    |

|                    |          |
|--------------------|----------|
| C(30)-C(29)-C(28)  | 121.4(4) |
| C(30)-C(29)-H(29A) | 119.3    |
| C(28)-C(29)-H(29A) | 119.3    |
| C(29)-C(30)-C(31)  | 118.1(4) |
| C(29)-C(30)-H(30A) | 120.9    |
| C(31)-C(30)-H(30A) | 120.9    |
| C(30)-C(31)-C(26)  | 120.9(3) |
| C(30)-C(31)-C(32)  | 131.5(3) |
| C(26)-C(31)-C(32)  | 106.8(3) |
| N(8)-C(32)-N(7)    | 122.7(3) |
| N(8)-C(32)-C(31)   | 127.6(3) |
| N(7)-C(32)-C(31)   | 107.1(3) |
| N(8)-C(33)-N(9)    | 122.9(3) |
| N(8)-C(33)-C(34)   | 128.4(3) |
| N(9)-C(33)-C(34)   | 106.5(3) |
| C(35)-C(34)-C(39)  | 120.9(3) |
| C(35)-C(34)-C(33)  | 131.8(3) |
| C(39)-C(34)-C(33)  | 106.9(3) |
| C(36)-C(35)-C(34)  | 117.8(4) |
| C(36)-C(35)-H(35A) | 121.1    |
| C(34)-C(35)-H(35A) | 121.1    |
| C(35)-C(36)-C(37)  | 121.5(3) |
| C(35)-C(36)-H(36A) | 119.2    |
| C(37)-C(36)-H(36A) | 119.2    |
| C(38)-C(37)-C(36)  | 121.5(3) |
| C(38)-C(37)-H(37A) | 119.3    |
| C(36)-C(37)-H(37A) | 119.3    |
| C(37)-C(38)-C(39)  | 117.9(4) |
| C(37)-C(38)-H(38A) | 121.1    |
| C(39)-C(38)-H(38A) | 121.1    |
| C(38)-C(39)-C(34)  | 120.4(3) |
| C(38)-C(39)-C(40)  | 131.9(3) |
| C(34)-C(39)-C(40)  | 107.3(3) |
| N(10)-C(40)-N(9)   | 123.6(3) |
| N(10)-C(40)-C(39)  | 128.1(3) |
| N(9)-C(40)-C(39)   | 105.9(3) |

|                    |          |
|--------------------|----------|
| N(10)-C(41)-N(11)  | 123.0(3) |
| N(10)-C(41)-C(42)  | 129.5(3) |
| N(11)-C(41)-C(42)  | 106.2(3) |
| C(43)-C(42)-C(47)  | 121.2(3) |
| C(43)-C(42)-C(41)  | 132.1(4) |
| C(47)-C(42)-C(41)  | 106.6(3) |
| C(42)-C(43)-C(44)  | 117.8(4) |
| C(42)-C(43)-H(43A) | 121.1    |
| C(44)-C(43)-H(43A) | 121.1    |
| C(43)-C(44)-C(45)  | 120.8(4) |
| C(43)-C(44)-H(44A) | 119.6    |
| C(45)-C(44)-H(44A) | 119.6    |
| C(46)-C(45)-C(44)  | 122.0(4) |
| C(46)-C(45)-H(45A) | 119.0    |
| C(44)-C(45)-H(45A) | 119.0    |
| C(45)-C(46)-C(47)  | 117.9(4) |
| C(45)-C(46)-H(46A) | 121.1    |
| C(47)-C(46)-H(46A) | 121.1    |
| C(46)-C(47)-C(42)  | 120.1(4) |
| C(46)-C(47)-C(48)  | 132.4(4) |
| C(42)-C(47)-C(48)  | 107.4(3) |
| N(12)-C(48)-N(11)  | 122.4(3) |
| N(12)-C(48)-C(47)  | 130.1(3) |
| N(11)-C(48)-C(47)  | 105.9(3) |
| O(1)-B(1)-N(3)     | 117.7(3) |
| O(1)-B(1)-N(1)     | 114.0(3) |
| N(3)-B(1)-N(1)     | 102.1(3) |
| O(1)-B(1)-N(5)     | 116.4(3) |
| N(3)-B(1)-N(5)     | 102.5(3) |
| N(1)-B(1)-N(5)     | 101.9(3) |
| O(1)-B(2)-N(7)     | 114.5(3) |
| O(1)-B(2)-N(11)    | 117.3(3) |
| N(7)-B(2)-N(11)    | 102.7(3) |
| O(1)-B(2)-N(9)     | 115.4(3) |
| N(7)-B(2)-N(9)     | 103.0(3) |
| N(11)-B(2)-N(9)    | 102.0(3) |

---

Symmetry transformations used to generate equivalent atoms:



**Table S15.** Anisotropic displacement parameters ( $\text{\AA}^2 \times 10^3$ ) for Cl<sub>6</sub>BsubPc-O-BsubPc. The anisotropic displacement factor exponent takes the form:  $-2p^2[ h^2 a^*2U^{11} + \dots + 2 h k a^* b^* U^{12} ]$

|       | U <sup>11</sup> | U <sup>22</sup> | U <sup>33</sup> | U <sup>23</sup> | U <sup>13</sup> | U <sup>12</sup> |
|-------|-----------------|-----------------|-----------------|-----------------|-----------------|-----------------|
| Cl(1) | 103(1)          | 46(1)           | 53(1)           | 7(1)            | 56(1)           | 0(1)            |
| Cl(2) | 58(1)           | 68(1)           | 47(1)           | 32(1)           | 17(1)           | 5(1)            |
| Cl(3) | 32(1)           | 40(1)           | 84(1)           | 22(1)           | 27(1)           | 10(1)           |
| Cl(4) | 35(1)           | 34(1)           | 78(1)           | 12(1)           | 29(1)           | 0(1)            |
| Cl(5) | 52(1)           | 14(1)           | 52(1)           | -2(1)           | 28(1)           | -3(1)           |
| Cl(6) | 40(1)           | 23(1)           | 46(1)           | -5(1)           | 22(1)           | 1(1)            |
| O(1)  | 26(1)           | 20(1)           | 28(1)           | -3(1)           | 13(1)           | -1(1)           |
| N(1)  | 31(2)           | 14(1)           | 30(2)           | 1(1)            | 16(1)           | 0(1)            |
| N(2)  | 33(2)           | 18(2)           | 35(2)           | 4(1)            | 16(2)           | 0(1)            |
| N(3)  | 28(2)           | 14(1)           | 28(2)           | 1(1)            | 12(1)           | 1(1)            |
| N(4)  | 32(2)           | 16(1)           | 27(2)           | 2(1)            | 13(1)           | 2(1)            |
| N(5)  | 24(2)           | 16(1)           | 29(2)           | 2(1)            | 13(1)           | -1(1)           |
| N(6)  | 35(2)           | 18(2)           | 35(2)           | 1(1)            | 18(2)           | -1(1)           |
| N(7)  | 28(2)           | 12(1)           | 30(2)           | 2(1)            | 12(1)           | 2(1)            |
| N(8)  | 26(2)           | 18(2)           | 32(2)           | 1(1)            | 12(1)           | -1(1)           |
| N(9)  | 26(2)           | 14(1)           | 29(2)           | 0(1)            | 12(1)           | 0(1)            |
| N(10) | 28(2)           | 18(2)           | 30(2)           | -3(1)           | 14(1)           | -2(1)           |
| N(11) | 32(2)           | 12(1)           | 26(2)           | -1(1)           | 13(1)           | -1(1)           |
| N(12) | 38(2)           | 13(1)           | 32(2)           | -2(1)           | 16(2)           | -1(1)           |
| C(1)  | 32(2)           | 17(2)           | 32(2)           | 1(2)            | 18(2)           | -2(2)           |
| C(2)  | 40(2)           | 16(2)           | 32(2)           | 1(2)            | 17(2)           | -4(2)           |
| C(3)  | 53(3)           | 20(2)           | 39(2)           | -2(2)           | 28(2)           | -3(2)           |
| C(4)  | 57(3)           | 29(2)           | 34(2)           | -3(2)           | 24(2)           | -12(2)          |
| C(5)  | 43(2)           | 35(2)           | 30(2)           | 7(2)            | 11(2)           | -6(2)           |
| C(6)  | 38(2)           | 30(2)           | 36(2)           | 7(2)            | 14(2)           | 0(2)            |
| C(7)  | 36(2)           | 24(2)           | 29(2)           | 1(2)            | 13(2)           | -6(2)           |
| C(8)  | 32(2)           | 16(2)           | 30(2)           | 2(2)            | 13(2)           | 1(2)            |
| C(9)  | 26(2)           | 15(2)           | 31(2)           | 0(1)            | 11(2)           | 3(1)            |
| C(10) | 34(2)           | 18(2)           | 32(2)           | 0(2)            | 15(2)           | 2(2)            |
| C(11) | 29(2)           | 26(2)           | 39(2)           | 4(2)            | 15(2)           | 2(2)            |
| C(12) | 28(2)           | 28(2)           | 45(2)           | 5(2)            | 17(2)           | 5(2)            |

|       |       |       |       |        |       |        |
|-------|-------|-------|-------|--------|-------|--------|
| C(13) | 28(2) | 24(2) | 42(2) | -2(2)  | 17(2) | -3(2)  |
| C(14) | 29(2) | 20(2) | 30(2) | -2(2)  | 14(2) | -1(2)  |
| C(15) | 28(2) | 19(2) | 27(2) | -4(1)  | 13(2) | -2(1)  |
| C(16) | 27(2) | 16(2) | 26(2) | -1(1)  | 12(2) | -4(1)  |
| C(17) | 27(2) | 16(2) | 24(2) | 1(1)   | 12(2) | -2(1)  |
| C(18) | 26(2) | 19(2) | 28(2) | 3(1)   | 10(2) | 2(1)   |
| C(19) | 28(2) | 18(2) | 33(2) | 1(2)   | 12(2) | 2(2)   |
| C(20) | 31(2) | 15(2) | 37(2) | 1(2)   | 13(2) | 0(2)   |
| C(21) | 29(2) | 20(2) | 34(2) | -2(2)  | 14(2) | 4(2)   |
| C(22) | 29(2) | 20(2) | 35(2) | 1(2)   | 15(2) | 1(2)   |
| C(23) | 24(2) | 17(2) | 34(2) | 1(2)   | 13(2) | 1(1)   |
| C(24) | 27(2) | 18(2) | 30(2) | 1(2)   | 12(2) | 0(1)   |
| C(25) | 33(2) | 13(2) | 28(2) | 0(1)   | 12(2) | 1(2)   |
| C(26) | 34(2) | 14(2) | 32(2) | 0(2)   | 13(2) | 3(2)   |
| C(27) | 41(2) | 18(2) | 34(2) | 3(2)   | 13(2) | 3(2)   |
| C(28) | 43(2) | 29(2) | 36(2) | 4(2)   | 11(2) | 5(2)   |
| C(29) | 36(2) | 28(2) | 35(2) | -4(2)  | 7(2)  | -1(2)  |
| C(30) | 30(2) | 23(2) | 37(2) | -3(2)  | 12(2) | -2(2)  |
| C(31) | 30(2) | 19(2) | 29(2) | -1(2)  | 12(2) | 3(2)   |
| C(32) | 30(2) | 17(2) | 29(2) | -2(1)  | 13(2) | -2(1)  |
| C(33) | 30(2) | 14(2) | 30(2) | 2(1)   | 14(2) | -1(1)  |
| C(34) | 32(2) | 16(2) | 31(2) | 2(2)   | 17(2) | -2(2)  |
| C(35) | 33(2) | 15(2) | 36(2) | -2(2)  | 14(2) | -4(2)  |
| C(36) | 44(2) | 12(2) | 40(2) | -3(2)  | 20(2) | -3(2)  |
| C(37) | 39(2) | 18(2) | 37(2) | -2(2)  | 19(2) | 4(2)   |
| C(38) | 34(2) | 18(2) | 38(2) | 4(2)   | 19(2) | 3(2)   |
| C(39) | 28(2) | 16(2) | 29(2) | 2(1)   | 12(2) | 0(1)   |
| C(40) | 25(2) | 17(2) | 26(2) | 2(1)   | 11(2) | 2(1)   |
| C(41) | 28(2) | 17(2) | 27(2) | -5(1)  | 14(2) | -4(1)  |
| C(42) | 38(2) | 18(2) | 28(2) | -7(2)  | 22(2) | -7(2)  |
| C(43) | 36(2) | 23(2) | 36(2) | -11(2) | 20(2) | -8(2)  |
| C(44) | 43(2) | 30(2) | 43(2) | -15(2) | 28(2) | -14(2) |
| C(45) | 52(3) | 24(2) | 39(2) | -8(2)  | 30(2) | -14(2) |
| C(46) | 51(3) | 17(2) | 33(2) | -5(2)  | 25(2) | -8(2)  |
| C(47) | 42(2) | 14(2) | 29(2) | -6(1)  | 21(2) | -7(2)  |
| C(48) | 39(2) | 11(2) | 27(2) | -1(1)  | 15(2) | -2(2)  |

|      |       |       |       |      |       |      |
|------|-------|-------|-------|------|-------|------|
| B(1) | 28(2) | 16(2) | 27(2) | 2(2) | 12(2) | 3(2) |
| B(2) | 28(2) | 13(2) | 29(2) | 2(2) | 15(2) | 0(2) |

---

**Table S16.** Hydrogen coordinates ( $\times 10^4$ ) and isotropic displacement parameters ( $\text{\AA}^2 \times 10^3$ ) for Cl<sub>6</sub>BsubPc-O-BsubPc.

|        | x    | y     | z    | U(eq) |
|--------|------|-------|------|-------|
| H(3A)  | 3225 | 9811  | 9477 | 42    |
| H(6A)  | 5272 | 7457  | 9687 | 43    |
| H(11A) | 6962 | 8847  | 8551 | 38    |
| H(14A) | 6489 | 12464 | 7373 | 31    |
| H(19A) | 4251 | 14930 | 7157 | 33    |
| H(22A) | 2864 | 13640 | 8367 | 33    |
| H(27A) | 1971 | 11601 | 3670 | 39    |
| H(28A) | 884  | 10802 | 2741 | 47    |
| H(29A) | 444  | 8991  | 2873 | 44    |
| H(30A) | 1080 | 7936  | 3929 | 37    |
| H(35A) | 2880 | 4963  | 5301 | 34    |
| H(36A) | 3771 | 3507  | 5508 | 38    |
| H(37A) | 5065 | 3877  | 6127 | 37    |
| H(38A) | 5519 | 5729  | 6537 | 35    |
| H(43A) | 6482 | 9682  | 6366 | 36    |
| H(44A) | 6876 | 11255 | 5905 | 42    |
| H(45A) | 6011 | 12655 | 5214 | 42    |
| H(46A) | 4741 | 12577 | 4978 | 38    |

**Table S17.** Torsion angles [°] for Cl<sub>6</sub>BsubPc-O-BsubPc.

---

|                       |           |
|-----------------------|-----------|
| C(24)-N(6)-C(1)-N(1)  | -7.4(5)   |
| C(24)-N(6)-C(1)-C(2)  | 155.1(4)  |
| C(8)-N(1)-C(1)-N(6)   | 153.5(3)  |
| B(1)-N(1)-C(1)-N(6)   | -15.9(5)  |
| C(8)-N(1)-C(1)-C(2)   | -12.4(4)  |
| B(1)-N(1)-C(1)-C(2)   | 178.2(3)  |
| N(6)-C(1)-C(2)-C(3)   | 19.4(7)   |
| N(1)-C(1)-C(2)-C(3)   | -175.8(4) |
| N(6)-C(1)-C(2)-C(7)   | -158.2(4) |
| N(1)-C(1)-C(2)-C(7)   | 6.6(4)    |
| C(7)-C(2)-C(3)-C(4)   | -3.2(6)   |
| C(1)-C(2)-C(3)-C(4)   | 179.5(4)  |
| C(2)-C(3)-C(4)-C(5)   | 2.3(6)    |
| C(2)-C(3)-C(4)-Cl(1)  | -176.8(3) |
| C(3)-C(4)-C(5)-C(6)   | 0.9(6)    |
| Cl(1)-C(4)-C(5)-C(6)  | -180.0(3) |
| C(3)-C(4)-C(5)-Cl(2)  | -178.0(3) |
| Cl(1)-C(4)-C(5)-Cl(2) | 1.2(5)    |
| C(4)-C(5)-C(6)-C(7)   | -3.2(6)   |
| Cl(2)-C(5)-C(6)-C(7)  | 175.7(3)  |
| C(5)-C(6)-C(7)-C(2)   | 2.3(6)    |
| C(5)-C(6)-C(7)-C(8)   | 179.6(4)  |
| C(3)-C(2)-C(7)-C(6)   | 0.9(6)    |
| C(1)-C(2)-C(7)-C(6)   | 178.7(3)  |
| C(3)-C(2)-C(7)-C(8)   | -177.0(3) |
| C(1)-C(2)-C(7)-C(8)   | 0.8(4)    |
| C(9)-N(2)-C(8)-N(1)   | 9.5(5)    |
| C(9)-N(2)-C(8)-C(7)   | -155.8(4) |
| C(1)-N(1)-C(8)-N(2)   | -155.7(3) |
| B(1)-N(1)-C(8)-N(2)   | 13.9(5)   |
| C(1)-N(1)-C(8)-C(7)   | 12.8(4)   |
| B(1)-N(1)-C(8)-C(7)   | -177.6(3) |
| C(6)-C(7)-C(8)-N(2)   | -18.2(7)  |
| C(2)-C(7)-C(8)-N(2)   | 159.4(4)  |

|                         |           |
|-------------------------|-----------|
| C(6)-C(7)-C(8)-N(1)     | 174.5(4)  |
| C(2)-C(7)-C(8)-N(1)     | -7.9(4)   |
| C(8)-N(2)-C(9)-N(3)     | -8.0(5)   |
| C(8)-N(2)-C(9)-C(10)    | 154.1(4)  |
| C(16)-N(3)-C(9)-N(2)    | 154.9(3)  |
| B(1)-N(3)-C(9)-N(2)     | -17.4(5)  |
| C(16)-N(3)-C(9)-C(10)   | -10.9(4)  |
| B(1)-N(3)-C(9)-C(10)    | 176.8(3)  |
| N(2)-C(9)-C(10)-C(11)   | 18.3(7)   |
| N(3)-C(9)-C(10)-C(11)   | -177.4(4) |
| N(2)-C(9)-C(10)-C(15)   | -158.0(4) |
| N(3)-C(9)-C(10)-C(15)   | 6.3(4)    |
| C(15)-C(10)-C(11)-C(12) | 0.4(6)    |
| C(9)-C(10)-C(11)-C(12)  | -175.4(4) |
| C(10)-C(11)-C(12)-C(13) | 0.5(6)    |
| C(10)-C(11)-C(12)-Cl(3) | -179.4(3) |
| C(11)-C(12)-C(13)-C(14) | -0.6(6)   |
| Cl(3)-C(12)-C(13)-C(14) | 179.3(3)  |
| C(11)-C(12)-C(13)-Cl(4) | 178.6(3)  |
| Cl(3)-C(12)-C(13)-Cl(4) | -1.5(5)   |
| C(12)-C(13)-C(14)-C(15) | -0.3(6)   |
| Cl(4)-C(13)-C(14)-C(15) | -179.5(3) |
| C(13)-C(14)-C(15)-C(10) | 1.2(5)    |
| C(13)-C(14)-C(15)-C(16) | 175.2(4)  |
| C(11)-C(10)-C(15)-C(14) | -1.2(5)   |
| C(9)-C(10)-C(15)-C(14)  | 175.5(3)  |
| C(11)-C(10)-C(15)-C(16) | -176.6(3) |
| C(9)-C(10)-C(15)-C(16)  | 0.1(4)    |
| C(17)-N(4)-C(16)-N(3)   | 9.5(5)    |
| C(17)-N(4)-C(16)-C(15)  | -155.7(4) |
| C(9)-N(3)-C(16)-N(4)    | -157.6(3) |
| B(1)-N(3)-C(16)-N(4)    | 14.6(5)   |
| C(9)-N(3)-C(16)-C(15)   | 11.0(4)   |
| B(1)-N(3)-C(16)-C(15)   | -176.9(3) |
| C(14)-C(15)-C(16)-N(4)  | -14.0(7)  |
| C(10)-C(15)-C(16)-N(4)  | 160.6(4)  |

|                         |           |
|-------------------------|-----------|
| C(14)-C(15)-C(16)-N(3)  | 179.0(4)  |
| C(10)-C(15)-C(16)-N(3)  | -6.4(4)   |
| C(16)-N(4)-C(17)-N(5)   | -9.7(5)   |
| C(16)-N(4)-C(17)-C(18)  | 150.5(4)  |
| C(24)-N(5)-C(17)-N(4)   | 152.2(3)  |
| B(1)-N(5)-C(17)-N(4)    | -13.7(5)  |
| C(24)-N(5)-C(17)-C(18)  | -12.1(4)  |
| B(1)-N(5)-C(17)-C(18)   | -178.0(3) |
| N(4)-C(17)-C(18)-C(19)  | 16.8(7)   |
| N(5)-C(17)-C(18)-C(19)  | 179.6(4)  |
| N(4)-C(17)-C(18)-C(23)  | -154.7(4) |
| N(5)-C(17)-C(18)-C(23)  | 8.1(4)    |
| C(23)-C(18)-C(19)-C(20) | 2.4(5)    |
| C(17)-C(18)-C(19)-C(20) | -168.0(4) |
| C(18)-C(19)-C(20)-C(21) | 3.4(6)    |
| C(18)-C(19)-C(20)-Cl(5) | -177.1(3) |
| C(19)-C(20)-C(21)-C(22) | -6.5(6)   |
| Cl(5)-C(20)-C(21)-C(22) | 174.0(3)  |
| C(19)-C(20)-C(21)-Cl(6) | 169.9(3)  |
| Cl(5)-C(20)-C(21)-Cl(6) | -9.6(5)   |
| C(20)-C(21)-C(22)-C(23) | 3.3(6)    |
| Cl(6)-C(21)-C(22)-C(23) | -173.1(3) |
| C(21)-C(22)-C(23)-C(18) | 2.5(6)    |
| C(21)-C(22)-C(23)-C(24) | 168.1(4)  |
| C(19)-C(18)-C(23)-C(22) | -5.5(6)   |
| C(17)-C(18)-C(23)-C(22) | 167.0(3)  |
| C(19)-C(18)-C(23)-C(24) | -174.3(3) |
| C(17)-C(18)-C(23)-C(24) | -1.7(4)   |
| C(1)-N(6)-C(24)-N(5)    | 10.0(5)   |
| C(1)-N(6)-C(24)-C(23)   | -153.3(4) |
| C(17)-N(5)-C(24)-N(6)   | -155.3(3) |
| B(1)-N(5)-C(24)-N(6)    | 10.3(5)   |
| C(17)-N(5)-C(24)-C(23)  | 11.1(4)   |
| B(1)-N(5)-C(24)-C(23)   | 176.7(3)  |
| C(22)-C(23)-C(24)-N(6)  | -7.0(7)   |
| C(18)-C(23)-C(24)-N(6)  | 160.1(4)  |

|                         |           |
|-------------------------|-----------|
| C(22)-C(23)-C(24)-N(5)  | -172.4(4) |
| C(18)-C(23)-C(24)-N(5)  | -5.4(4)   |
| C(48)-N(12)-C(25)-N(7)  | 11.2(5)   |
| C(48)-N(12)-C(25)-C(26) | -149.3(4) |
| C(32)-N(7)-C(25)-N(12)  | -153.9(3) |
| B(2)-N(7)-C(25)-N(12)   | 10.8(5)   |
| C(32)-N(7)-C(25)-C(26)  | 10.4(4)   |
| B(2)-N(7)-C(25)-C(26)   | 175.0(3)  |
| N(12)-C(25)-C(26)-C(27) | -13.0(7)  |
| N(7)-C(25)-C(26)-C(27)  | -176.1(4) |
| N(12)-C(25)-C(26)-C(31) | 157.6(4)  |
| N(7)-C(25)-C(26)-C(31)  | -5.4(4)   |
| C(31)-C(26)-C(27)-C(28) | 1.7(6)    |
| C(25)-C(26)-C(27)-C(28) | 171.3(4)  |
| C(26)-C(27)-C(28)-C(29) | -1.7(6)   |
| C(27)-C(28)-C(29)-C(30) | -0.1(6)   |
| C(28)-C(29)-C(30)-C(31) | 2.0(6)    |
| C(29)-C(30)-C(31)-C(26) | -2.0(6)   |
| C(29)-C(30)-C(31)-C(32) | -170.2(4) |
| C(27)-C(26)-C(31)-C(30) | 0.2(6)    |
| C(25)-C(26)-C(31)-C(30) | -171.8(3) |
| C(27)-C(26)-C(31)-C(32) | 171.0(3)  |
| C(25)-C(26)-C(31)-C(32) | -1.0(4)   |
| C(33)-N(8)-C(32)-N(7)   | -8.8(5)   |
| C(33)-N(8)-C(32)-C(31)  | 150.5(4)  |
| C(25)-N(7)-C(32)-N(8)   | 151.9(3)  |
| B(2)-N(7)-C(32)-N(8)    | -12.7(5)  |
| C(25)-N(7)-C(32)-C(31)  | -11.1(4)  |
| B(2)-N(7)-C(32)-C(31)   | -175.7(3) |
| C(30)-C(31)-C(32)-N(8)  | 14.7(7)   |
| C(26)-C(31)-C(32)-N(8)  | -154.8(4) |
| C(30)-C(31)-C(32)-N(7)  | 176.5(4)  |
| C(26)-C(31)-C(32)-N(7)  | 7.1(4)    |
| C(32)-N(8)-C(33)-N(9)   | 9.0(5)    |
| C(32)-N(8)-C(33)-C(34)  | -151.9(4) |
| C(40)-N(9)-C(33)-N(8)   | -154.7(3) |



|                         |           |
|-------------------------|-----------|
| B(2)-N(9)-C(33)-N(8)    | 12.2(5)   |
| C(40)-N(9)-C(33)-C(34)  | 9.8(4)    |
| B(2)-N(9)-C(33)-C(34)   | 176.7(3)  |
| N(8)-C(33)-C(34)-C(35)  | -13.5(7)  |
| N(9)-C(33)-C(34)-C(35)  | -176.8(4) |
| N(8)-C(33)-C(34)-C(39)  | 158.4(4)  |
| N(9)-C(33)-C(34)-C(39)  | -5.0(4)   |
| C(39)-C(34)-C(35)-C(36) | 3.2(5)    |
| C(33)-C(34)-C(35)-C(36) | 174.1(4)  |
| C(34)-C(35)-C(36)-C(37) | -1.8(6)   |
| C(35)-C(36)-C(37)-C(38) | -1.0(6)   |
| C(36)-C(37)-C(38)-C(39) | 2.4(6)    |
| C(37)-C(38)-C(39)-C(34) | -1.0(5)   |
| C(37)-C(38)-C(39)-C(40) | -172.8(4) |
| C(35)-C(34)-C(39)-C(38) | -1.8(5)   |
| C(33)-C(34)-C(39)-C(38) | -174.8(3) |
| C(35)-C(34)-C(39)-C(40) | 171.8(3)  |
| C(33)-C(34)-C(39)-C(40) | -1.1(4)   |
| C(41)-N(10)-C(40)-N(9)  | -9.8(5)   |
| C(41)-N(10)-C(40)-C(39) | 150.2(4)  |
| C(33)-N(9)-C(40)-N(10)  | 153.3(3)  |
| B(2)-N(9)-C(40)-N(10)   | -13.7(5)  |
| C(33)-N(9)-C(40)-C(39)  | -10.5(4)  |
| B(2)-N(9)-C(40)-C(39)   | -177.4(3) |
| C(38)-C(39)-C(40)-N(10) | 16.7(7)   |
| C(34)-C(39)-C(40)-N(10) | -156.0(4) |
| C(38)-C(39)-C(40)-N(9)  | 179.4(4)  |
| C(34)-C(39)-C(40)-N(9)  | 6.8(4)    |
| C(40)-N(10)-C(41)-N(11) | 9.5(5)    |
| C(40)-N(10)-C(41)-C(42) | -155.1(4) |
| C(48)-N(11)-C(41)-N(10) | -155.7(3) |
| B(2)-N(11)-C(41)-N(10)  | 14.4(5)   |
| C(48)-N(11)-C(41)-C(42) | 11.9(4)   |
| B(2)-N(11)-C(41)-C(42)  | -178.0(3) |
| N(10)-C(41)-C(42)-C(43) | -17.5(6)  |
| N(11)-C(41)-C(42)-C(43) | 176.0(4)  |

|                         |           |
|-------------------------|-----------|
| N(10)-C(41)-C(42)-C(47) | 159.6(4)  |
| N(11)-C(41)-C(42)-C(47) | -6.9(4)   |
| C(47)-C(42)-C(43)-C(44) | 2.7(5)    |
| C(41)-C(42)-C(43)-C(44) | 179.4(4)  |
| C(42)-C(43)-C(44)-C(45) | -3.4(5)   |
| C(43)-C(44)-C(45)-C(46) | 0.8(6)    |
| C(44)-C(45)-C(46)-C(47) | 2.6(6)    |
| C(45)-C(46)-C(47)-C(42) | -3.3(5)   |
| C(45)-C(46)-C(47)-C(48) | -179.2(4) |
| C(43)-C(42)-C(47)-C(46) | 0.7(5)    |
| C(41)-C(42)-C(47)-C(46) | -176.8(3) |
| C(43)-C(42)-C(47)-C(48) | 177.5(3)  |
| C(41)-C(42)-C(47)-C(48) | 0.0(4)    |
| C(25)-N(12)-C(48)-N(11) | -9.2(5)   |
| C(25)-N(12)-C(48)-C(47) | 154.5(4)  |
| C(41)-N(11)-C(48)-N(12) | 155.3(3)  |
| B(2)-N(11)-C(48)-N(12)  | -14.8(5)  |
| C(41)-N(11)-C(48)-C(47) | -11.8(4)  |
| B(2)-N(11)-C(48)-C(47)  | 178.0(3)  |
| C(46)-C(47)-C(48)-N(12) | 17.3(6)   |
| C(42)-C(47)-C(48)-N(12) | -159.0(4) |
| C(46)-C(47)-C(48)-N(11) | -176.9(4) |
| C(42)-C(47)-C(48)-N(11) | 6.8(4)    |
| B(2)-O(1)-B(1)-N(3)     | -14.8(6)  |
| B(2)-O(1)-B(1)-N(1)     | -134.4(4) |
| B(2)-O(1)-B(1)-N(5)     | 107.5(4)  |
| C(9)-N(3)-B(1)-O(1)     | -91.4(4)  |
| C(16)-N(3)-B(1)-O(1)    | 97.2(4)   |
| C(9)-N(3)-B(1)-N(1)     | 34.2(4)   |
| C(16)-N(3)-B(1)-N(1)    | -137.2(3) |
| C(9)-N(3)-B(1)-N(5)     | 139.4(3)  |
| C(16)-N(3)-B(1)-N(5)    | -31.9(4)  |
| C(1)-N(1)-B(1)-O(1)     | -96.1(4)  |
| C(8)-N(1)-B(1)-O(1)     | 95.5(4)   |
| C(1)-N(1)-B(1)-N(3)     | 135.9(3)  |
| C(8)-N(1)-B(1)-N(3)     | -32.5(4)  |

|                       |           |
|-----------------------|-----------|
| C(1)-N(1)-B(1)-N(5)   | 30.2(4)   |
| C(8)-N(1)-B(1)-N(5)   | -138.2(3) |
| C(24)-N(5)-B(1)-O(1)  | 97.1(4)   |
| C(17)-N(5)-B(1)-O(1)  | -98.7(4)  |
| C(24)-N(5)-B(1)-N(3)  | -133.0(3) |
| C(17)-N(5)-B(1)-N(3)  | 31.2(4)   |
| C(24)-N(5)-B(1)-N(1)  | -27.5(4)  |
| C(17)-N(5)-B(1)-N(1)  | 136.7(3)  |
| B(1)-O(1)-B(2)-N(7)   | -137.7(4) |
| B(1)-O(1)-B(2)-N(11)  | -17.2(5)  |
| B(1)-O(1)-B(2)-N(9)   | 103.0(4)  |
| C(32)-N(7)-B(2)-O(1)  | -97.7(4)  |
| C(25)-N(7)-B(2)-O(1)  | 99.4(4)   |
| C(32)-N(7)-B(2)-N(11) | 134.0(3)  |
| C(25)-N(7)-B(2)-N(11) | -28.8(4)  |
| C(32)-N(7)-B(2)-N(9)  | 28.3(4)   |
| C(25)-N(7)-B(2)-N(9)  | -134.6(3) |
| C(41)-N(11)-B(2)-O(1) | 95.4(4)   |
| C(48)-N(11)-B(2)-O(1) | -95.5(4)  |
| C(41)-N(11)-B(2)-N(7) | -138.2(3) |
| C(48)-N(11)-B(2)-N(7) | 30.9(4)   |
| C(41)-N(11)-B(2)-N(9) | -31.6(4)  |
| C(48)-N(11)-B(2)-N(9) | 137.4(3)  |
| C(33)-N(9)-B(2)-O(1)  | 97.3(4)   |
| C(40)-N(9)-B(2)-O(1)  | -97.1(4)  |
| C(33)-N(9)-B(2)-N(7)  | -28.1(4)  |
| C(40)-N(9)-B(2)-N(7)  | 137.4(3)  |
| C(33)-N(9)-B(2)-N(11) | -134.4(3) |
| C(40)-N(9)-B(2)-N(11) | 31.2(4)   |

---

Symmetry transformations used to generate equivalent atoms:

## References

- (1) I. Noviandri, K. N. Brown, D. S. Fleming, P. T. Gulyas, P. A. Lay, A. F. Masters and L. Phillips, *J. Phys. Chem. B*, 1999, **103**, 6713-6722.
- (2) J. D. Dang, J. D. Virido, B. H. Lessard, E. Bultz, A. S. Paton and T. P. Bender, *Macromolecules*, 2012, **45**, 7791-7798.
- (3) M. V. Fulford, A. J. Lough and T. P. Bender, *Acta Cryst. B*, 2012, **68**, 636-645.
- (4) G. E. Morse, M. G. Helander, J. F. Maka, Z.-H. Lu and T. P. Bender, *ACS Appl. Mater. Interfaces*, 2010, **2**, 1934-1944.
- (5) P. Sullivan, A. Duraud, I. Hancox, N. Beaumont, G. Mirri, J. H. R. Tucker, R. A. Hatton, M. Shipman and T. S. Jones, *Adv. Energy Mater.*, 2011, **1**, 352-355.
- (6) G. E. Morse and T. P. Bender, *Inorg. Chem.*, 2012, **51**, 6460-6467.
- (7) M. Geyer, F. Plenzig, J. Rauschnabel, M. Hanack, B. del Rey, A. Sastre and T. Torres, *Synthesis*, 1996, **9**, 1139-1151.
- (8) Y. Yamasaki and T. Mori, *Bull. Chem. Soc. Jpn.*, 2011, **84**, 1208-1214.
- (9) M. V. Fulford, D. Jaidka, A. S. Paton, G. E. Morse, E. R. L. Brisson, A. J. Lough and T. P. Bender, *J. Chem. Eng. Data*, 2012, **57**, 2756-2765.
- (10) T. Mori, F. Furuya and Y. Yamasaki, US Patent Application **2008/210128 A1**.
- (11) D. Gonzalez-Rodriguez, T. Torres, D. M. Guldi, J. Rivera, M. A. A. Herranz and L. Echegoyen *J. Am. Chem. Soc.*, 2004, **126**, 6301-6313.
